# Supplementary material
Source: publisher figshare collection journal article supplement (https://diabetesjournals.figshare.com/ndownloader/files/22262490)
Supplement: Supplementary file 1 [file 22262490]

**Online-Only Supplemental Material**

**Cardiovascular risk reduction with liraglutide: an exploratory mediation analysis of the LEADER trial**

John B Buse MD PhD, Stephen C Bain FRCP, Johannes FE Mann MD, Michael A Nauck MD, Steven E Nissen MD, Stuart Pocock PhD, Neil R Poulter F.Med.Sci., Richard E Pratley MD, Martin Linder MSc, Tea Monk Fries MD PhD, David D Ørsted MD PhD, Bernard Zinman MD; on behalf of the LEADER Trial Investigators.

**CONTENTS:**

[**Supplementary Figure S1.** Probability of no MACE occurring in patients treated with liraglutide and placebo, and with adjustment for HbA1c as a candidate mediator, and body weight, UACR, systolic blood pressure, LDL, confirmed hypoglycemic episodes, insulin use and sulfonylurea use as confounders, using the Vansteelandt method. 2](#_Toc30411567)

[**Supplementary Figure S2.** On-treatment analysis for the probability of no MACE in patients treated with liraglutide and placebo, and with adjustment for HbA1c as a candidate mediator using the Vansteelandt method. 3](#_Toc30411568)

[**Supplementary Figure S3.** Analysis of time to first MACE with reversed adjustment for HbA1c using the Vansteelandt method. 4](#_Toc30411569)

[**Supplementary Figure S4.** Probability of no (A) all-cause death, and (B) CV death occurring in patients treated with liraglutide and placebo, and with adjustment for HbA1c as a candidate mediator using the Vansteelandt method. 5](#_Toc30411570)

[**LEADER Trial Committee Members and Investigators** 6](#_Toc30411571)

# **Supplementary Figure S1. Probability of no MACE occurring in patients treated with liraglutide and placebo, and with adjustment for HbA1c as a candidate mediator, and body weight, UACR, systolic blood pressure, LDL, confirmed hypoglycemic episodes, insulin use and sulfonylurea use as confounders, using the Vansteelandt method.**


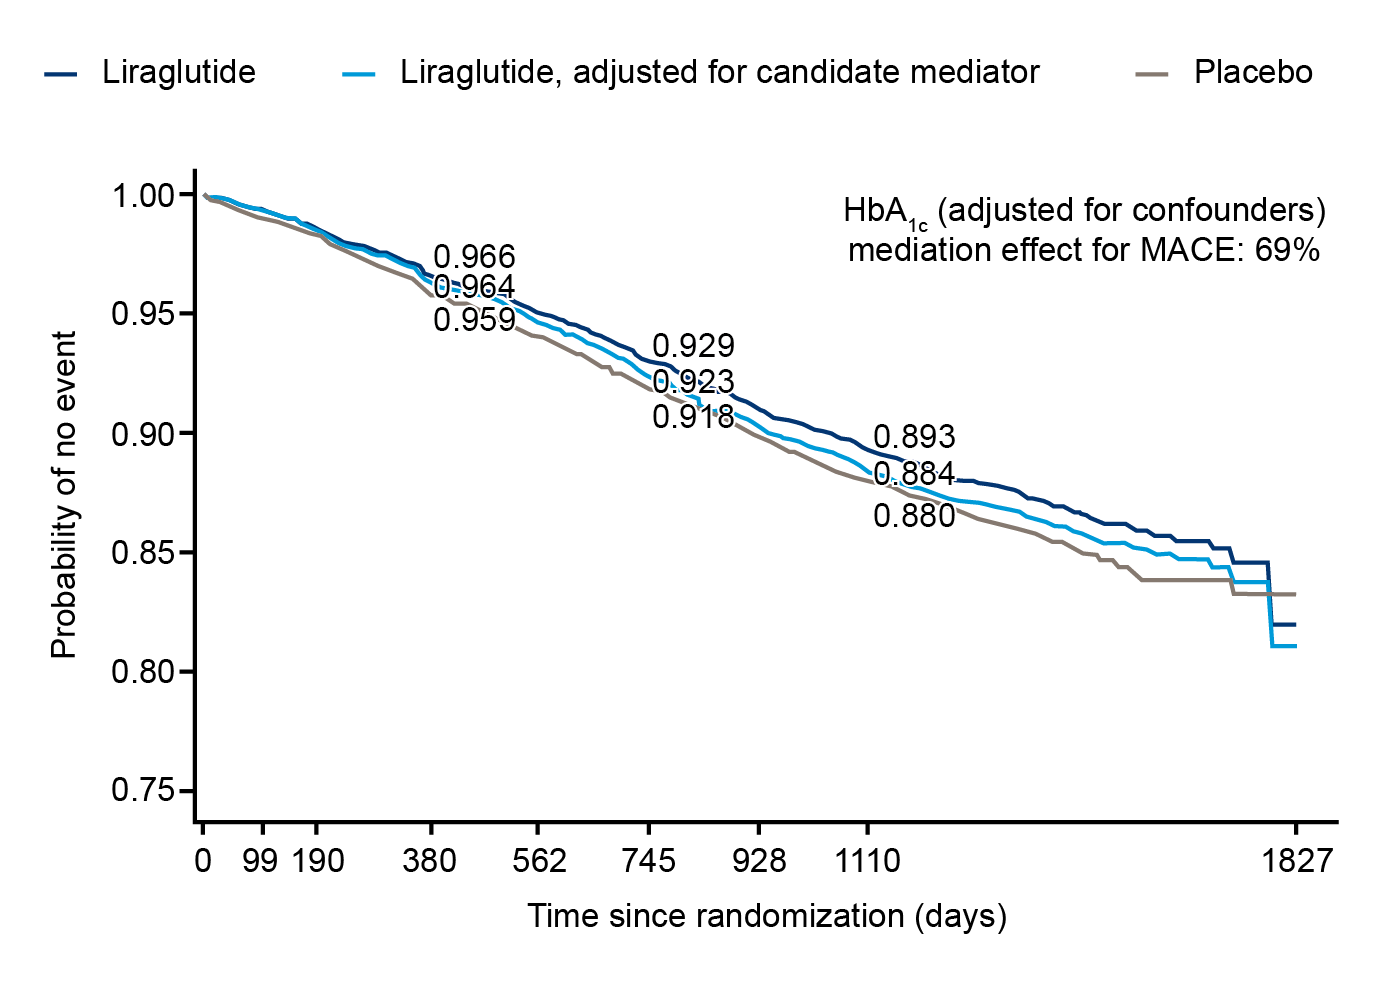
HbA1c, glycated hemoglobin; MACE, major adverse cardiovascular event; UACR, urinary albumin-to-creatinine ratio

# **Supplementary Figure S2. On-treatment analysis for the probability of no MACE in patients treated with liraglutide and placebo, and with adjustment for HbA1c as a candidate mediator using the Vansteelandt method.**


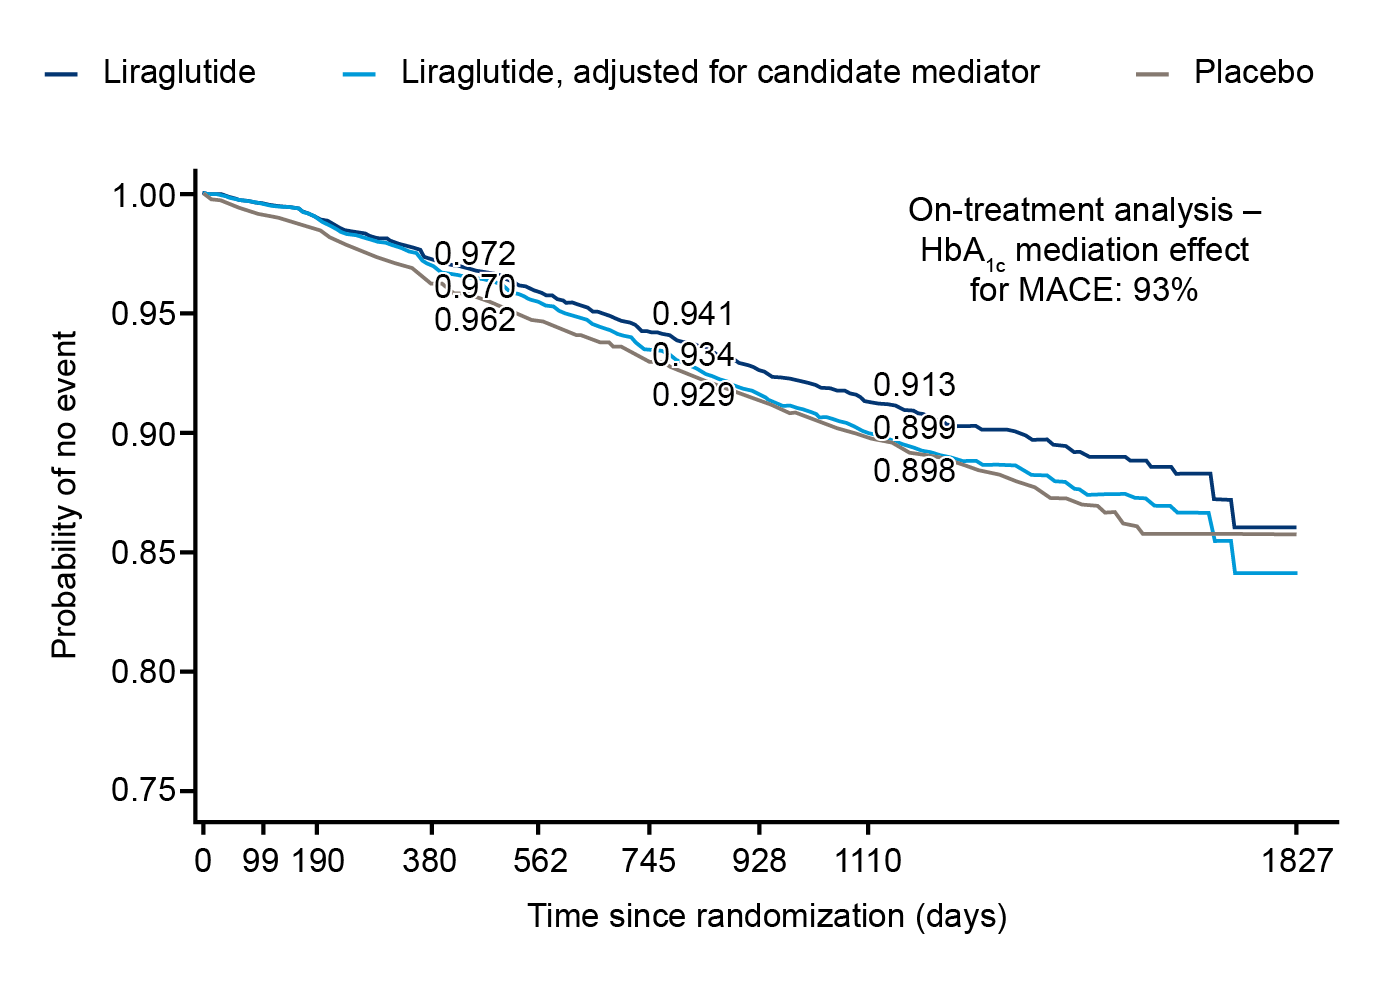
HbA1c, glycated hemoglobin; MACE, major adverse cardiovascular event

# **Supplementary Figure S3. Analysis of time to first MACE with reversed adjustment for HbA1c using the Vansteelandt method.**


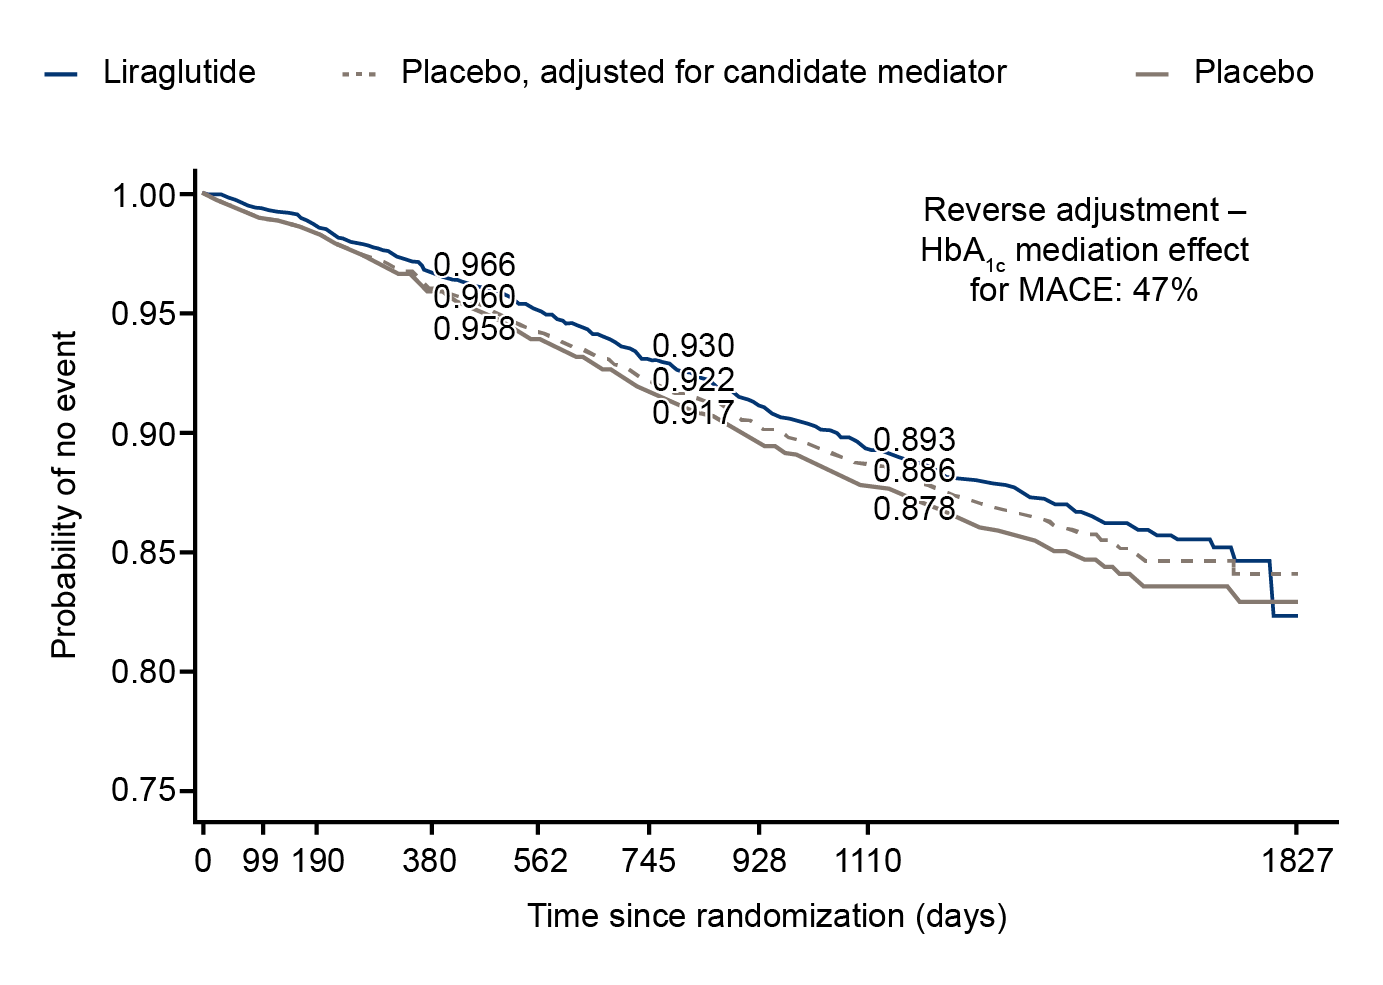


HbA1c, glycated hemoglobin; MACE, major adverse cardiovascular event

# **Supplementary Figure S4. Probability of no (A) all-cause death, and (B) CV death occurring in patients treated with liraglutide and placebo, and with adjustment for HbA1c as a candidate mediator using the Vansteelandt method.**


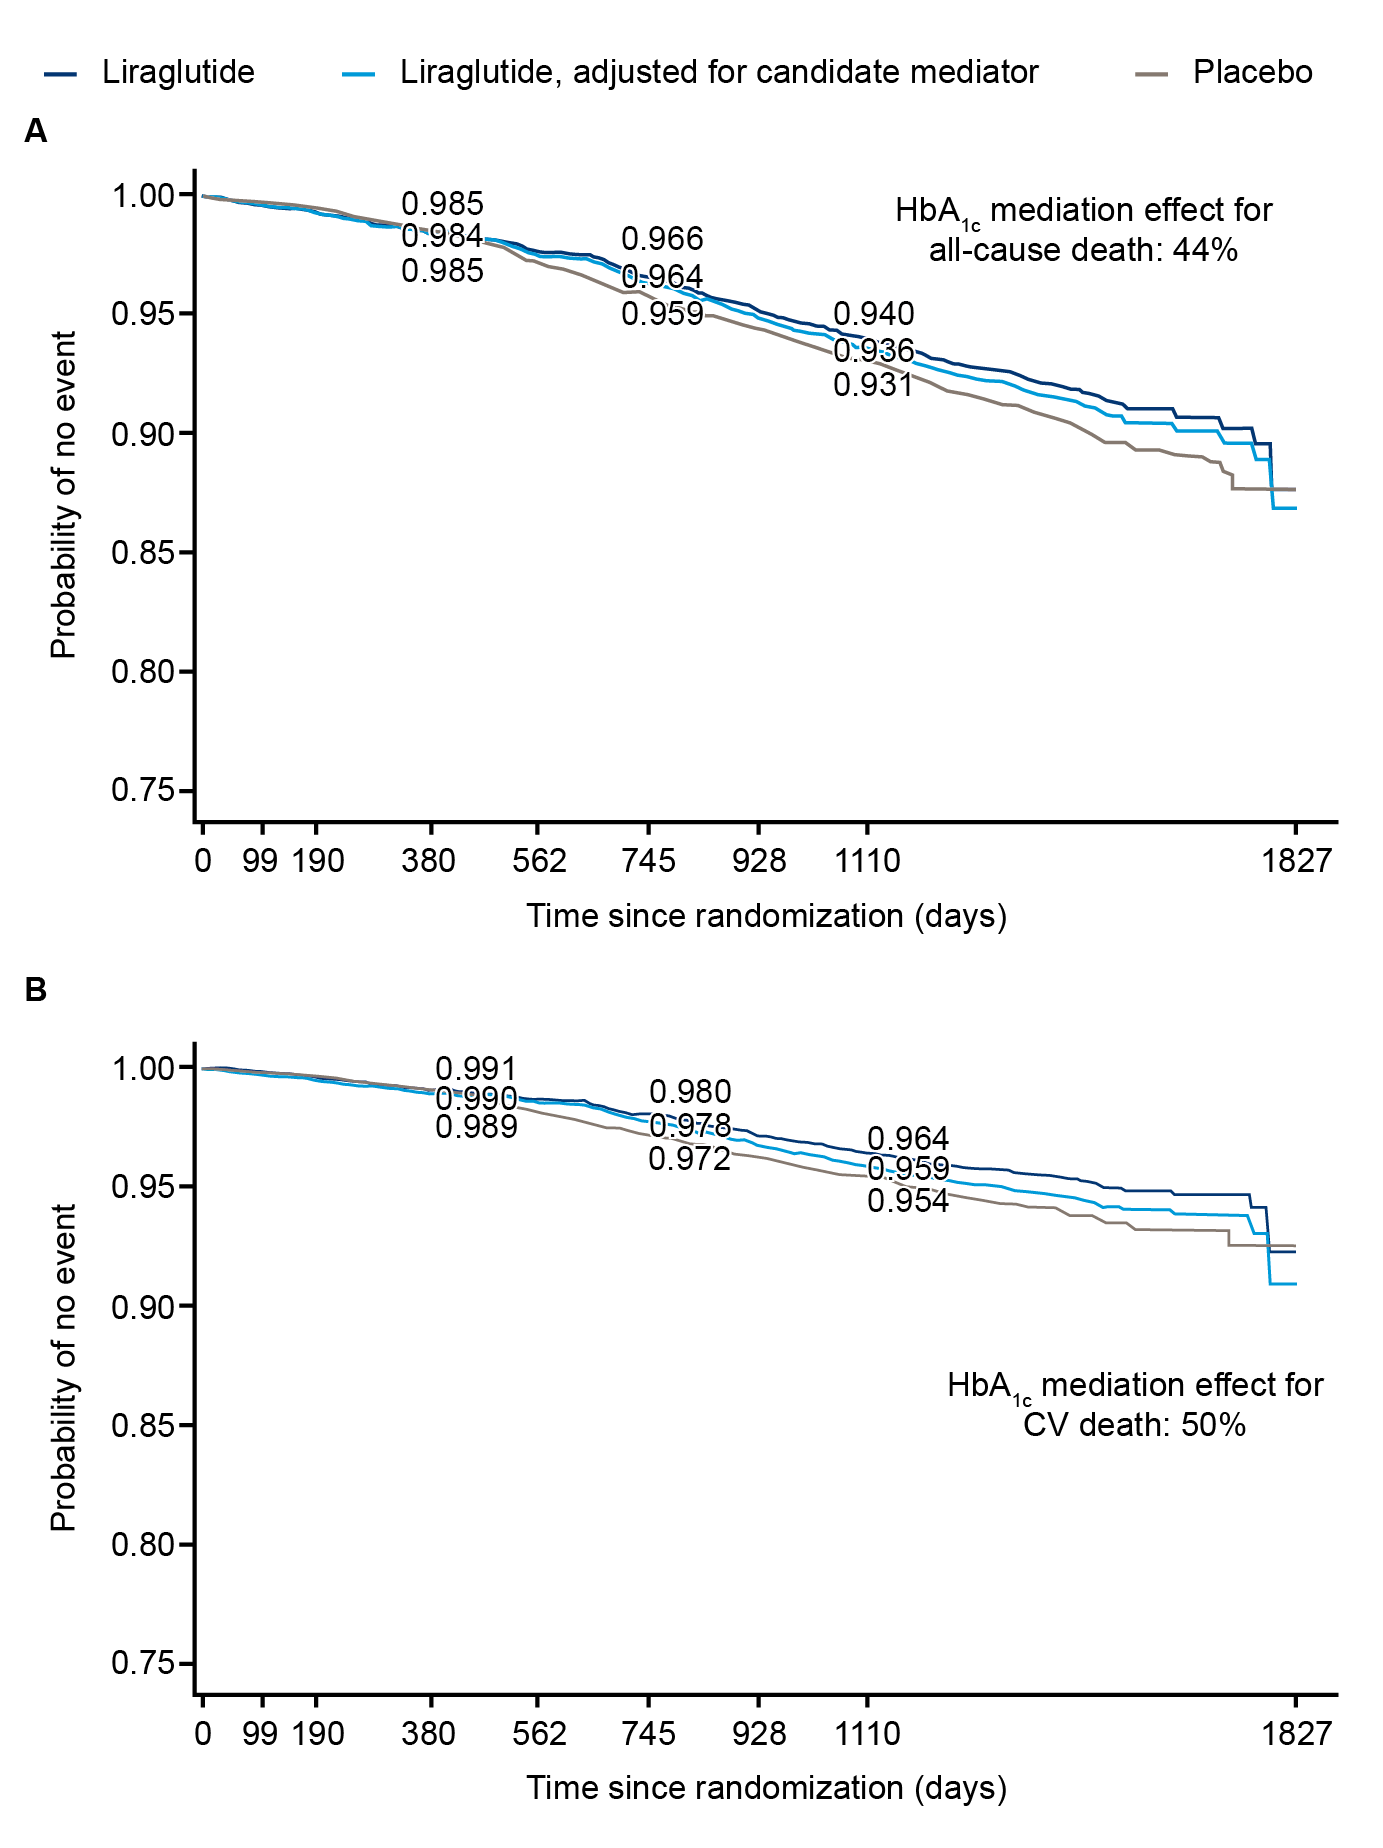


CV, cardiovascular; HbA1c, glycated hemoglobin

# **LEADER Trial Committee Members and Investigators**

*Steering Committee:* Richard Bergenstal, Park Nicollet Institute, International Diabetes Center, Minneapolis, MN, USA; John Buse, The University of North Carolina School of Medicine, Chapel Hill, NC, USA; Gilbert Daniels, Massachusetts General Hospital, Boston, MA, USA; Johannes Mann, Friedrich Alexander University of Erlangen, Erlangen, Germany; Steven P Marso, UT Southwestern, Clinical Heart Center, Dallas, TX, USA; Allan Charles Moses, Novo Nordisk A/S, Søborg, Denmark (2009-2014); Michael Nauck, Medizinishe Klinik, St Josef Hospital (Ruhr-Universität Bochum), Bohum, Germany; Steven Nissen, Cleveland Clinic, Cleveland, OH, USA; Stuart Pocock, London School of Hygiene and Tropical Medicine, London, UK; Neil Poulter, International Centre for Circulatory Health, Imperial College, London, UK; William Steinberg, George Washington University Medical Center, MD, USA; Bernard Zinman, Samuel Lunenfeld Research Institute, Mount Sinai Hospital, Toronto, Canada; Kirstine Brown Frandsen, Novo Nordisk A/S, Søborg, Denmark; Mette Stockner, Novo Nordisk A/S, Søborg, Denmark; Peter Kristensen, Novo Nordisk A/S, Søborg, Denmark (2015-2016); Lasse Steen Ravn, Novo Nordisk A/S, Søborg, Denmark (2011-2016); Marcin Zychma, Novo Nordisk A/S, Søborg, Denmark (2009-2011).

*Data Monitoring Committee:* Allan Flyvbjerg, Aarhus University, Aarhus, Denmark; Ian Ford, University of Glasgow, Glasgow, United Kingdom; Richard T. Kloos, Veracyte, Inc, South San Francisco, CA, USA; Mark J. Schactman, (External Independent Statistician), Statistics Collaborative, Inc., Washington DC, USA; Peter Sleight, John Radcliffe Hospital, Oxford, United Kingdom; Karl Swedberg, Sahlgrenska University Hospital/Östra, Gothenburg, Sweden; Scott M. Tenner, State University of New York, NY, USA.

*Global Expert Panel*: Sema Akalın, Marmara University Medical FacultyIstanbul, Turkey (2010); Rosario Arechavaleta, Colonia Monraz, Guadalajara, Mexico; Steve Bain, Swansea University Medical School, Swansea, UK; Miguel Camafort Babkowski, Comité Español Interdisciplinario de Prevención Cardiovascular España, Sociedad Española de Medicina Interna, Madrid, Spain (2010–2011); Marian Benroubi, Athens Polyclinic General Hospital, Athens, Greece; Lori Berard, Health Sciences Centre Winnipeg, University of Manitoba, Winnipeg, Canada; Abdurrahman Comlekci, Dokuz Eylul University, Izmir, Turkey; Leszek Czupryniak, Medical University of Lodz, Lodz, Poland; Björn Eliasson, Sahlgrenska University Hospital, Gothenburg, Sweden; Mats Eriksson, Karolinska University Hospital, Stockholm, Sweden; Vivian Fonseca, Tulane University Health Sciences Center, New Orleans, LA, USA; Edward Franek, Central Clinical Hospital MSW, Warsaw, Poland; Jorge Gross, Hospital de Clinicas de Porto Alegre, Porto Alegre, Brazil; Khadija Hafidh, Rashid Hospital, Dubai, United Arab Emirates; Martin Haluzik, Charles University, Praha, Czech Republic; Frances Hayes, Dept. of Endocrinology, St. Vinent's University Hospital, Dublin , Ireland (2010-2013); Yu-Yao Huang, Chang Gung Memorial Hospital and Chang Gung University, Taoyuan, Taiwan; Stephan Jacob, Kardio Metabolischen Instituts, VillingenSchwenningen, Germany; Ghaida Kaddaha, Rashid Hospital, Dubai, United Arab Emirates (2011-2014); Ali Khalil, Center for Diabetes and Endocrinology, Sheikh Khalifa Medical City, Abu Dhabi, United Arab Emirates (2010); Bente Kilhovd, Oslo University Hospital, Oslo, Norway; Markku Laakso, University of Eastern Finland and Kuopio University Hospital, Kuopio, Finland; Lawrence Leiter, St. Michael's Hospital, University of Toronto, Toronto, Canada; Nebojsa Lalic, University Medical Center and Belgrade School of Medicine, Belgrade, Serbia; Linong Ji, Peking University People’s Hospital, Beijing, China; Joerg Luedemann, Medicine and Nutrition Diabetes and Foot Care Centre, Falkensee, Germany; Eduardo Mannucci, Diabetes Section Geriatric Unit, Careggi Hospital, Florence, Italy; Michel Marre, Groupe Hospitalier Bichat, Paris, France; Luis Masmiquel, Universitat de les Illes Balears, Palma de Mallorca, Spain; Maria Mota, University of Medicine and Pharmacy of Craiova, Craiova, Romania; Mahomed Omar, Nelson R Mandela School of Medicine, University of KwaZulu Natal, South Africa; Donal O’Shea, St Vincent’s Hospital, Dublin, Ireland; Changyu Pan, Chinese PLA General Hospital, Beijing, China; John Petrie, BHF Glasgow Cardiovascular Research Centre, University of Glasgow, Glasgow, UK; Thomas Pieber, Medical University of Graz, Graz, Austria; Richard Pratley, Florida Hospital, Diabetes Institute, Orlando, FL, USA; Itamar Raz, Hadassah Hebrew University Hospital, Jerusalem, Israel; Rosangela Rea, Clinical Hospital of the Federal University of Parana, Curitiba, Brazil; Guy Rutten, University Medical Center Utrecht, Utrecht, The Netherlands; Ilhan Satman, Istanbul University, Istanbul, Turkey; Marina Shestakova, Endocrinology Research Centre and M.I., Sechenov First Moscow State Medical University, Moscow, Russia; Richard Simpson, Eastern Clinical Research Unit, Monash University and Eastern Health, Victoria, Australia; Diarmuid Smith, Beaumont Hospital, Dublin, Ireland; Cornelis Tack, Radboud University Nijmegen Medical Centre, Nijmegen, Netherlands; Lise Tarnow, Nordsjællands Hospital, Hillerød, Denmark; Nihal Thomas, Endocrinology, Diabetes and Metabolism, Christian Medical College and Hospital, Vellore, Tamil Nadu, India; Luc Van Gaal, Antwerp University Hospital, Antwerp, Belgium; Florence Travert, Groupe Hospitalier Bichat, Paris, France (2010-2015); Josep Vidal, Hospital Clínic de Barcelona, Barcelona, Spain; Mark Warren, Endocrinology and Metabolism Physicians East, PA, Greenville, SC, USA; Kun-Ho Yoon, Seoul St. Mary's Hospital, The Catholic University of Korea, Seoul, Republic of Korea.

*Calcitonin Monitoring Committee*: Robert Michael Tuttle, Memorial Sloan-Kettering Cancer Center and Weill Medical College of Cornell University, Brewster, NY, USA; Stephen I. Sheerman, The University of Texas MD Anderson Cancer Center, Houston, TX, USA; Laszlo Hegedüs, Odense University Hospital, Odense, Denmark.

*Patient Retention Panel*: Heike Baerwald, Diabetologische Schwerpunktpraxis, Gifhorn, Germany; Lori Berard, Health Sciences Centre, University of Manitoba, Winnipeg, Canada; Margit Bergenstal, Region Skåne, Endokrinologiska kliniken, Malmo, Sweden (2012–2013); Selda Celik, Istanbul Medical Faculty, Istanbul University, Istanbul, Turkey; Cristiane Dias, Hospital Santa Casa, Curitiba, Brazil; Michaela Eder, Klinische Studienkoordinatorin, Diabetes-und Stoffwechselambulanz Medizinische Universität Graz, Austria (2010-2013); Stacey Fitzgibbons, USA (2010- 2011); Lena Irvhage, Avdelningen för Kliniska Prövningar, Universitetssjukhuset Örebro, Sweden (2010-2011); Jana Kloluckova, Charles University and General University Hospital, Prague, Czech Republic; Rozalin Kriulianski, Institute of Endocrinology , Diabetes and Metabolism, Rambam Medical Center, Haifa, Israel (2010-2013); Roberta McDuffie, Tulane University, New Orleans, LA, USA; Solfrid Moen, Stavanger Helseforskning, Stavanger, Norway; Ayana Paster, Sheba Medical Center, Tel-Hashomer, Israel; Rosangela Maria Saalfeld, General Carneiro, Curitiba, Brazil (2010-2013); Kavitha Sankar, Christian Medical College, Vellore, India; Ermal Shehaj, Istituto Scientifico San Raffaele, Italy (2010-2011); Patrycja Swierzewska, Niepubliczny Zakład Opieki Zdrowotnej OmniMed, ul. Rzgowska, Łódź, Poland (2010-2012); Margaret Tiktin, Case Western Reserve University, Cleveland, OH, USA; Sharon Tovey, Southmead Hospital, Bristol, UK.

*Event Adjudication Committees*

*Chair*: C. Michael Gibson, Harvard Medical School, Boston, MA, USA.

*Cardiology*: Anjan K. Chakrabarti, Eastern Virginia Medical School, Chesapeake, VA, USA; John Francis Dashe, St. Elizabeth’s Medical Center, Boston/Waltham, MA, USA; Judith Hinchey, St. Elisabeth’s Medical Center, Boston, MA, USA; Megan Carroll Leary, Lehigh Valley Hospital, Allentown, PA, USA; Yuri Pride, Gwinnett Medical Center, Lawrenceville, GA, USA; Steve Wiviott, Brigham and Women’s Hospital, Boston, MA, USA.

*Microvascular*: Samuel Allen, Tallman Eye Association, Lawrence, MA, USA; Ali Poyan Mehr, Beth Israel Deaconess Medical Center, Boston, MA, USA; Walter P. Mutter, Newton-Wellesley Hospital, Newton, MA, USA; Samir Parikh, Harvard Medical School, Newton, MA, USA; Subhransu Ray, Bay Area Retina Associates, CA, USA.

*Pancreatitis*: Adam Cheifetz, Beth Israel Deaconess Medical Center, Boston, MA, USA; Daniel Leffler, Beth Israel Deaconess Medical Centre, Boston, MA, USA; Sunil Sheth, Beth Israel Deaconess Medical Centre, Boston, MA, USA

*Oncology*: Erik Alexander, Brigham and Women’s Hospital, Boston, MA, USA; Jason L. Gaglia, Harvard Medical School, Boston, MA, USA; Wolfram Goessling, Harvard Medical School, Boston, MA, USA; Lyle D Mitzner (Former), Joslin Diabetes Center, Boston, MA, USA; Carol Rosenberg, Harvard Vanguard/ Boston University School of Medicine, Boston, MA, USA; Kenneth J. Snow (Former), Joslin Diabetes Center, Boston, MA, USA; Andrew Wagner, Dana-Farber Cancer Institute, Boston, MA, USA.

*ECG reviewer*: Gregory Piazza, Brigham and Women’s Hospital, Boston, MA, USA

*Study Investigators*

*Australia*: Sally Abell, St. Vincent's Hospital, Fitzroy, VIC; Tim Davis, University of Western Australia, School of Medicine and Pharmacology, Fremantle Hospital, Fremantle, WA; Michael D'Emden, Royal Brisbane & Womens Hospital, Herston, QLD; Su Ann Ding, Blacktown Hospital Clinical Trials Centre, University of Western Sydney, Blacktown, NSW; Christopher Gilfillan, Eastern Health Clinical School, Monash University, Melbourne, VIC; Tim Greenaway, Diabetes Centre, Royal Hobart Hospital, Hobart, TAS; Florence Gunawan, Eastern Health Clinical School, Monash University, Melbourne, VIC; Jui Ho, South Australian Endocrine Research Pty Ltd, Keswick, SA; Richard Jackson, Logan Hospital, Griffith University, Griffith University, Meadowbrook, QLD; Balvinder Kalra, Eastern Health Clinical School, Monash University, Melbourne, VIC; Sue-Lynn Lau, Blacktown Hospital Clinical Trials Centre, University of Western Sydney, Blacktown, NSW; Jaime Lin, Blacktown Hospital Clinical Trials Centre, University of Western Sydney, Blacktown, NSW; Richard MacIsaac, St. Vincent's Hospital, Fitzroy, VIC; Ashley Makepeace, University of Western Australia, School of Medicine and Pharmacology, Fremantle Hospital, Fremantle, WA; Usman Malabu, Townsville Hospital, Douglas, QLD; Joanne Marjason, Royal Brisbane & Women’s Hospital, Herston, QLD; Roland McCallum, Diabetes Centre, Royal Hobart Hospital, Hobart, TAS; Mark McLean, Blacktown Hospital Clinical Trials Centre, University of Western Sydney, Blacktown, NSW; Naswrin Moin, Blacktown Hospital Clinical Trials Centre, University of Western Sydney, Blacktown, NSW; Carolyn Petersons, Southern Adelaide Diabetes & Endocrine Services, Repatriation General Hospital, Adelaide, SA; Sarah Price, Eastern Health Clinical School, Monash University, Melbourne, VIC; Anthony Roberts, South Australian Endocrine Research Pty Ltd, Keswick, SA; David Roberts, Logan Hospital, Meadowbrook, QLD; Kunwarjit Sangla, Townsville Hospital, Douglas, QLD; Richard Simpson, Eastern Health Clinical School, Monash University, Melbourne, VIC; Stephen Stranks, Southern Adelaide Diabetes & Endocrine Services, Repatriation General Hospital, Adelaide, SA; Yong Tan, Townsville Hospital, Douglas, QLD; Tilenka Thynne, Southern Adelaide Diabetes & Endocrine Services, Repatriation General Hospital, Adelaide, SA; Jacqueline Walters, St. Vincent's Hospital, Fitzroy, VIC; Glenn Ward, St. Vincent's Hospital, Fitzroy, VIC; Wanling Wen, Eastern Health Clinical School, Monash University, Melbourne, VIC; Jane Zhang, Blacktown Hospital Clinical Trials Centre, University of Western Sydney, Blacktown, NSW.

*Austria*: Johanna Brix, Rudolfstiftung Hospital, Vienna; Astrid Feder, Rudolfstiftung Hospital, Vienna; Clemens Höbaus, Medical University of Vienna, Vienna; Florian Höllerl, Rudolfstiftung Hospital, Vienna; Vera Höller, Medical University of Graz, Graz; Torsten Kotter, Hanusch Hospital, Vienna; Eva Kratz, Rudolfstiftung Hospital, Vienna; Eva-Christina Krzizek, Rudolfstiftung Hospital, Vienna; Ulrike Leb-Stoeger, Medical University of Graz, Graz; Julia Mader, Medical University of Graz, Graz; Nikolaus Mras, Hanusch Hospital, Vienna; Eva Novak, Medical University of Graz, Graz; Florian Obendorf, Medical University of Vienna, Vienna; Slobodan Peric, Hietzing Hospital, Vienna; Gerfried Pesau, Medical University of Vienna, Vienna; Thomas Pieber, Medical University of Graz, Graz; Rudolf Prager, Hietzing Hospital, Vienna; Anja Ribitsch, Medical University of Graz, Graz; Christoph Schnack, Rudolfstiftung Hospital, Vienna; Guntram Schernthaner, Rudolfstiftung Hospital, Vienna; Gerit Schernthaner, Medical University of Vienna, Vienna; Thomas Wascher, Hanusch Hospital, Vienna.

*Belgium*: Arsène-Hélène Batens, Ghent University Hospital, De Pintelaan, Ghent; Katrien Benhalima, University Hospital Leuven, Leuven; Christophe De Block, Faculty of Medicine, Antwerp University Hospital, Edegem, Antwerp; Philippe Ernest, CHU de Liège, Liège; Alice Fouckova, Ghent University Hospital, De Pintelaan, Ghent; Bernard Jandrain, Pharmacology Clinic, CHU de Liège, Liège; Bruno Lapauw, Ghent University Hospital, De Pintelaan, Ghent; Michel Letiexhe, CHU de Liège, Liège; Chantal Mathieu, University Hospital Leuven, Leuven; Sophie Neven, University Hospital Leuven, Leuven; Frida Peiffer, Faculty of Medicine, Antwerp University Hospital, Edegem, Antwerp; Johannes Ruige, Ghent University Hospital, De Pintelaan, Ghent; André Scheen, CHU de Liège, Liège; Youri Taes, Ghent University Hospital, De Pintelaan, Ghent; Inge Van Boxelaer, University Hospital Leuven, Leuven; Greet Vandistel, University Hospital Leuven, Leuven; Yannick Van Durme, Ghent University Hospital, De Pintelaan, Ghent; Luc Van Gaal, Faculty of Medicine, Antwerp University Hospital, Edegem, Antwerp; Ann Verhaegen, Faculty of Medicine, Antwerp University Hospital, Edegem, Antwerp.

*Brazil*: Eveline Alencar, Centro de Pesquisas em Diabetes e Doenças Endócrino-metabólicas, Fortaleza, CE; Renata Alencar, Instituto Cearense de Endocrinologia, Fortaleza, CE; Ana Cristina Almeida, Irmandade da Santa Casa de Misericórdia de Curitiba, Unidade de Pesquisa Clínica, Curitiba, PR; Breno Alves, Hospital das Clinicas da Faculdade de Medicina de Universidade de Sao Paulo, São Paulo, SP; Erica Alves, Centro de Pesquisas Clínicas Ltda, São Paulo, SP; Graciella Alves, Hospital Geral de Goiânia Dr. Alberto Rassi, RDM Pesquisas Clínicas, Goiânia, GO; Jacy Alves, Hospital de Clínicas/UFPR, Curitiba, PR; Leticia Araujo, Hospital Geral de Goiânia Dr. Alberto Rassi, RDM Pesquisas Clínicas, Goiânia, GO; Vivian Arruda, Clínica de Endocrinologia Prof. Dr. Fadlo Fraige Filho, São Paulo, SP; Gustavo Akerman Augusto, CPQuali Pesquisa Clínica Ltda, São Paulo, SP; Rejane Baggentoss, Instituto de Endocrinologia e Diabetes de Joinville, Joinville, SC; Luíza Balestrassi, Hospital São Joaquim, Beneficência Portuguesa de São Paulo, São Paulo, SP; Marcus Barbosa, Instituto de Endocrinologia e Diabetes de Joinville, Joinville, SC; Igor Barcelos, Hospital Geral de Goiânia Dr. Alberto Rassi, RDM Pesquisas Clínicas, Goiânia, GO; Lucia Belem, Instituto Cearense de Endocrinologia, Fortaleza, CE; Anke de Bem, Hospital de Clinicas, Curitiba, PR; Roberto Tadeu Betti, Instituto do Coração do Hospital das Clínicas da Faculdade de Medicina da Universidade de São Paulo,, São Paulo, SP; Renata Bona, Centro de Pesquisas Clínicas Ltda, São Paulo, SP; Adriana Bosco, Centro de Estudos e Pesquisa da Clinica de Endocrinologia e Metabologia, Belo Horizonte, MG; Julia Branda, Hospital São Joaquim, Beneficência Portuguesa, São Paulo, SP; Marcello Bronstein, CPQuali Pesquisa Clínica Ltda., São Paulo, SP; Thiago Bueno, Clínica de Endocrinologia Prof. Dr. Fadlo Fraige Filho, São Paulo, SP; Tania Bulcão, Instituto de Estudos e Pesquisas Clínicas do Ceará, Fortaleza, CE; Fátima Caiado, Instituto de Ciências Farmacêuticas de Estudos e Pesquisas, Aparecida de Goiânia, GO; Fabio Camazzola, Instituto de Pesquisas Clínicas para Estudos Multicêntricos, Universidade de Caxias do Sul, Caxias do Sul, RS; Maria Fernanda Cambréa, Clínica de Endocrinologia Prof Dr Fadlo Fraige Filho, São Paulo, SP; Simone Campos, Centro de Estudos e Pesquisa da Clinica de Endocrinologia e Metabologia, Belo Horizonte, MG; Stela Campos, Instituto Estadual de Diabetes e Endocrinologia, Rio de Janeiro, RJ; Luis Canani, Centro de Pesquisas em Diabetes, Porto Alegre, RS; Mario Kehdi Carra, Hospital das Clínicas da Faculdade de Medicina da Universidade de São Paulo, São Paulo, SP; Salvador Caruso, Hospital São Joaquim, Beneficência Portuguesa de São Paulo, São Paulo, SP; Nara Carvalho, Centro de Pesquisas Medicas Básica e Clínica Ltda., Recife, PE; Angela Casillo, Instituto de Ensino e Pesquisa do Hospital da Cruz Vermelha Brasileira, Curitiba, PR; Denise Castro, Centro de Pesquisas Clínicas Ltda., São Paulo, SP; Taciana Cavalcanti, Centro de Pesquisas Medicas Básica e Clínica Ltda., Recife, PE; Vinicius Cavichioli, Centro de Endocrinologia Geloneze, Campinas, SP; Cintia Cercato, Hospital das Clinicas da Faculdade de Medicina de Universidade de Sao Paulo, São Paulo, SP; Antonio Chacra, Centro de Pesquisa Clínica em Diabetes, Hospital São Paulo UNIFESP, São Paulo, SP; William Challela, Instituto do Coração do Hospital das Clínicas da Faculdade de Medicina da Universidade de São Paulo,, São Paulo, SP; Helaine Silva Charchar, Hospital Universitário João de Barros Barreto, Belém, PA; Camila Chaves, Núcleo de Medicina Integrada, Mogi das Cruzes, SP; Carlos Chrisman, Núcleo de Medicina Integrada, Mogi das Cruzes, SP; Carolina Chrisman, Núcleo de Medicina Integrada, Mogi das Cruzes, SP; Joya Correia-Deur, Centro de Pesquisas Clínicas Ltda., São Paulo, SP; Augusto da Costa Junior, CPQuali Pesquisa Clínica Ltda,São Paulo, SP; Midiã Costa, Pontifícia Universidade Católica de Campinas, Campinas, SP; Bruna Costi, Centro de Pesquisas Medicas Básica e Clínica Ltda., Recife, PE; Priscilla Coutinho, Centro de Diabetes Curitiba, Curitiba, PR; Walmir Coutinho, Instituto Estadual de Diabetes e Endocrinologia, Rio de Janeiro, RJ; Maria Rosaria Cunha, Hospital das Clínicas da Faculdade de Medicina da Universidade de São Paulo, São Paulo, SP; Jorge Daher Junior, Hospital Geral de Goiânia Dr. Alberto Rassi, RDM Pesquisas Clínicas, Goiânia, GO; Elaine Davini, Hospital das Clínicas da Faculdade de Medicina da Universidade de São Paulo, São Paulo, SP; Dimas Democh Junior, Centro de Pesquisa Clínica em Diabetes, Hospital São Paulo UNIFESP, São Paulo, SP; Freddy Eliaschewitz, Centro de Pesquisas Clínicas Ltda., São Paulo, SP; Giuseppe Esmanhoto Facin, Instituto de Ensino e Pesquisa do Hospital da Cruz Vermelha Brasileira, Curitiba, PR; Francisco Farias, Centro de Pesquisas Medicas Básica e Clínica Ltda., Recife, PE; João Felício, Hospital Universitário João de Barros Barreto, Belém, PA; Virgínia Fernandes, Instituto Cearense de Endocrinologia, Fortaleza, CE; Celso Sallum Filho, Centro de Pesquisa Clínica em Diabetes, Hospital São Paulo UNIFESP, São Paulo, SP; Fadlo Fraige Filho, Clínica de Endocrinologia Prof. Dr. Fadlo Fraige Filho, São Paulo, SP; Manoel Filho, Centro de Pesquisas Medicas Básica e Clínica Ltda., Recife, PE; Daniele Fontan, Centro de Pesquisas Medicas Básica e Clínica Ltda., Recife, PE; Ana Paula Fontenele, Centro de Pesquisas em Diabetes e Doenças Endócrino-metabólicas, Fortaleza, CE; Adriana Forti, Centro de Estudos em Diabetes e Hipertensão, Fortaleza, CE; Denise Franco, Centro de Pesquisas Clínicas Ltda., São Paulo, SP; Kyara Freire, Centro de Pesquisas Medicas Básica e Clínica Ltda., Recife, PE; Annunziata Fusaro, Centro de Pesquisa Clínica em Diabetes, Hospital São Paulo UNIFESP, São Paulo, SP; Paulo Genestreti, Centro de Pesquisas Clínicas Ltda., São Paulo, SP; Fernando Gerchman, Hospital Moinhos de Vento, Porto Alegre, RS; Ana Godi, Hospital de Clinicas da Faculdade de Medicina de Marília, Marília, SP; Karla Fabiana Gomes, Hospital das Clínicas da Faculdade de Medicina da Universidade de São Paulo, São Paulo, SP; Pedro Gonçalves, Instituto Estadual de Diabetes e Endocrinologia, Rio de Janeiro, RJ; Rodrigo Gonçalves, Centro de Pesquisas Clínicas Ltda, São Paulo, SP; Luiz Griz, Centro de Pesquisas Medicas Básica e Clínica Ltda., Recife, PE; Jorge Gross, Centro de Pesquisas em Diabetes, Porto Alegre, RS; Michelle Grossman, Centro de Pesquisas Clínicas Ltda, São Paulo, SP; Maria Helane Gurgel, Instituto Cearense de Endocrinologia, Fortaleza, CE; Amine Wiener Vasconcellos Haddad, Clínica de Endocrinologia Prof. Dr. Fadlo Fraige Filho, São Paulo, SP; Alfredo Halpern, Hospital das Clinicas da Faculdade de Medicina de Universidade de Sao Paulo, São Paulo, SP; Miguel Hissa, Centro de Pesquisas em Diabetes e Doenças Endócrinometabólicas, Fortaleza, CE; Alinne Inuy, Clínica de Endocrinologia Prof. Dr. Fadlo Fraige Filho, São Paulo, SP; Juliana Jaime, Hospital Geral de Goiânia Dr. Alberto Rassi, RDM Pesquisas Clínicas, Goiânia, GO; Thaisa Jonasson, Hospital de Clínicas/UFPR, Curitiba, PR; José Carlos Jorge, Irmandade da Santa Casa de Misericórdia de Curitiba, Unidade de Pesquisa Clínica, Curitiba, PR; Fernanda Justus Malucelli, Hospital de Clinicas, Curitiba, PR; Suely Kohara, Instituto de Endocrinologia e Diabetes de Joinville, Joinville, SC; Caroline Kramer, Centro de Pesquisas em Diabetes, Porto Alegre, RS; Claudio Lacerda, Centro de Diabetes Curitiba, Curitiba, PR; Suzanny Ladeira, Hospital Universitário João de Barros Barreto, Belém, PA; Janaína Lana, Centro de Pesquisas Clínicas Ltda., São Paulo, SP; Flavio Lastebasse, Centro de Pesquisas Clínicas Ltda, São Paulo, SP; Andressa Leitão, Centro de Diabetes Curitiba, Curitiba, PR; Silmara Leite, Instituto de Ensino e Pesquisa do Hospital da Cruz Vermelha Brasileira, Curitiba, PR; Antonio Carlos Lerário, Instituto do Coração do Hospital das Clínicas da Faculdade de Medicina da Universidade de São Paulo, São Paulo, SP; Denise Lima, Centro de Pesquisas Medicas Básica e Clínica Ltda., Recife, PE; Marcelo Lima, Centro de Endocrinologia Geloneze, Campinas, SP; Vinicius Lippi, Hospital São Joaquim, Beneficência Portuguesa de São Paulo, São Paulo, SP; Maria Lunardi, Núcleo de Medicina Integrada, Mogi das Cruzes, SP; Evelyn Machado, Centro de Diabetes de Sergipe, Aracaju, SE; Frederico Maia, CPQuali Pesquisa Clínica Ltda., São Paulo, SP; Juliana Maia, Centro de Pesquisas Medicas Básica e Clínica Ltda., Recife, PE; Kleisson Pontes Maia, Centro de Estudos e Pesquisa da Clinica de Endocrinologia e Metabologia, Belo Horizonte, MG; Nadila Mañas, Hospital de Clinicas, Curitiba, PR; Frederico Marchisotti, CPQuali Pesquisa Clínica Ltda., São Paulo, SP; Carlos Marinho, Centro de Pesquisas Medicas Básica e Clínica Ltda., Recife, PE; Carliane Martins, Hospital Universitário João de Barros Barreto, Belém, PA; Fabrícia Figueiredo de Medeiros, Hospital Geral de Goiânia Dr. Alberto Rassi, RDM Pesquisas Clínicas, Goiânia, GO; Amanda Melo, Centro de Pesquisas Medicas Básica e Clínica Ltda., Recife, PE; Franciane Melo, Hospital Universitário João de Barros Barreto, Belém, PA; Eurico Mendonca, Centro de Pesquisa Clínica em Diabetes, Hospital São Paulo UNIFESP, São Paulo, SP; Paulo Mendonça, Hospital Geral de Goiânia Dr. Alberto Rassi, RDM Pesquisas Clínicas, Goiânia, GO; Raimundo Menezes Filho, Centro de Diabetes de Sergipe, Aracaju, SE; Marianna Miguel, Hospital Geral de Goiânia Dr. Alberto Rassi, RDM Pesquisas Clínicas, Goiânia, GO; Karem Miléo, Hospital Universitário João de Barros Barreto, Belém, PA; Margareth Miyahara, Hospital Universitário João de Barros Barreto, Belém, PA; Ana Paula Montenegro, Instituto Cearense de Endocrinologia, Fortaleza, CE; Aline Moraes, Instituto Estadual de Diabetes e Endocrinologia, Rio de Janeiro, RJ; Alessandro Moreira, Instituto de Ciências Farmacêuticas de Estudos e Pesquisas, Aparecida de Goiânia, GO; José Ítalo Mota, Instituto de Estudos e Pesquisas Clínicas do Ceará, Fortaleza, CE; Flávia Silvia Mothe, Pontifícia Universidade Católica de Campinas, Campinas, SP; Ada Murro, Universidade Estadual de Campinas, Campinas, SP; Viviane Nakatani, Hospital de Clinicas, Curitiba, PR; Thiago Fraga Napoli, Instituto de Pesquisa Clínica, São Paulo, SP; Bruno Geloneze Neto, Centro de Endocrinologia Geloneze, Campinas, SP; Oscar Queiroz Neto, Instituto de Estudos e Pesquisas Clínicas do Ceará, Fortaleza, CE; Edgard Niclewicz, Centro de Diabetes Curitiba, Curitiba, PR; Louis Nakayama Ohe, Centro de Pesquisa Clínica em Diabetes, Hospital São Paulo UNIFESP, São Paulo, SP; Francisco Oliveira, Hospital São Joaquim, BeneficênciaPortuguesa de São Paulo, São Paulo, SP; Marcela Oliveira, Centro de Pesquisas Medicas Básica e Clínica Ltda., Recife, PE; Daniel Panarotto, Instituto de Pesquisas Clínicas para Estudos Multicêntricos, Universidade de Caxias do Sul, Caxias do Sul, RS; Erika Parente, Hospital das Clínicas da Faculdade de Medicina da Universidade de São Paulo, São Paulo, SP; Salma Parolin, Irmandade da Santa Casa de Misericórdia de Curitiba, Unidade de Pesquisa Clínica, Curitiba, PR; Luciana Pechmann, Centro de Diabetes Curitiba, Curitiba, PR; Paula Costa da Penha, Hospital Universitário João de Barros Barreto, Belém, PA; Lidiane Perlamagna, Centro de Pesquisas Clínicas Ltda., São Paulo, SP; Bruno Perotta, Clínica de Endocrinologia Prof. Dr. Fadlo Fraige Filho, São Paulo, SP; Larissa Pimentel, Centro de Pesquisas Medicas Básica e Clínica Ltda., Recife, PE; Mauro Pinto, Centro de Diabetes Curitiba, Curitiba, PR; Christiani Poço, Instituto de Pesquisa Clínica, São Paulo, SP; Clarisse Ponte, Instituto Cearense de Endocrinologia Fortaleza, CE; Paula Prazeres, Centro de Pesquisas Medicas Básica e Clínica Ltda., Recife, PE; Eder Quintao, CPQuali Pesquisa Clínica Ltda., São Paulo, SP; Roberto Raduan, Hospital São Joaquim, Beneficência Portuguesa de São Paulo, São Paulo, SP; Danilo Teixeira Rassi, Hospital Geral de Goiânia Dr. Alberto Rassi, RDM Pesquisas Clínicas, Goiânia, GO; Nelson Rassi, Hospital Geral de Goiânia Dr. Alberto Rassi, RDM Pesquisas Clínicas, Goiânia, GO; Rosangela Rea, Universidade Federal do Parana, Curitiba, PR; Luciana Reck, Centro de Pesquisas em Diabetes, Porto Alegre, RS; Renan Montenegro Jr., Instituto Cearense de Endocrinologia, Fortaleza, CE; Rochele Ribeiro, Instituto Cearense de Endocrinologia, Fortaleza, CE; Sylka Rodovalho, Centro de Endocrinologia Geloneze, Campinas, SP; Goretti Silveira Rodrigues, Instituto de Endocrinologia e Diabetes de Joinville, Joinville, SC; Guilherme Rollin, Hospital Moinhos de Vento, Porto Alegre, RS; Sarah Rossi, Clínica de Endocrinologia Prof. Dr. Fadlo Fraige Filho, São Paulo, SP; Cleide Sabino, Centro de Pesquisas Clínicas Ltda., São Paulo, SP; Ana Paula Sales, Instituto Cearense de Endocrinologia, Fortaleza, CE; João Salles, Instituto de Pesquisa Clínica, São Paulo, SP; Celia Regina Sampaio, Centro de Pesquisas Clínicas Ltda., São Paulo, SP; Lidiana Santana, Hospital Universitário João de Barros Barreto, Belém, PA; Victor Sato, Centro de Pesquisas Clínicas Ltda., São Paulo, SP; Mariana da Silva Santos, Hospital Geral de Goiânia Dr. Alberto Rassi, RDM Pesquisas Clínicas, Goiânia, GO; Norma Lúcia Santos, Centro de Diabetes de Sergipe, Aracaju, SE; Rosa Santos, Hospital das Clínicas da Faculdade de Medicina da Universidade de São Paulo, São Paulo, SP; José Saraiva, Pontifícia Universidade Católica de Campinas, Campinas, SP; Carla Sartori, Centro de Pesquisas em Diabetes, Porto Alegre, RS; Rita Sena, Centro de Estudos em Diabetes e Hipertensão, Fortaleza, CE; Marcela Sevilha, Hospital São Joaquim, Beneficência Portuguesa de São Paulo, São Paulo, SP; José Sgarbi, Hospital de Clinicas da Faculdade de Medicina de Marília, Marília, SP; Dalisbor Silva, Instituto de Endocrinologia e Diabetes de Joinville, Joinville, SC; Daniel Silva, Centro de Estudos e Pesquisa da Clinica de Endocrinologia e Metabologia, Belo Horizonte, MG; Lilian D'albuquerque Silva, Hospital Universitário João de Barros Barreto, Belém, PA; Maria Elizabeth Silva, Hospital das Clínicas da Faculdade de Medicina da Universidade de São Paulo, São Paulo, SP; Kátia Siqueira, Centro de Pesquisas Clínicas Ltda, São Paulo, SP; Samuel Soares, Hospital Geral de Goiânia Dr. Alberto Rassi, RDM Pesquisas Clínicas, Goiânia, GO; Wladia Sobreira, Instituto de Estudos e Pesquisas Clínicas do Ceará, Fortaleza, CE; Bruno Sousa, Hospital das Clínicas da Faculdade de Medicina da Universidade de São Paulo, São Paulo, SP; Ana Carolina Souza, Hospital Universitário João de Barros Barreto, Belém, PA; Barbara Souza, Instituto de Endocrinologia e Diabetes de Joinville, Joinville, SC; Marcos Tambascia, Universidade Estadual de Campinas, Campinas, SP; Roberta Tarantino, Instituto Estadual de Diabetes e Endocrinologia, Rio de Janeiro, RJ; Fernanda Tenor, CPQuali Pesquisa Clínica Ltda., São Paulo, SP; Maithe Tomarchio, Clínica de Endocrinologia Prof. Dr. Fadlo Fraige Filho, São Paulo, SP; Cristina Triches, Instituto de Pesquisas Clínicas para Estudos Multicêntricos, Universidade de Caxias do Sul, Caxias do Sul, RS; Lívia Justen Tristão, Instituto de Ensino e Pesquisa do Hospital da Cruz Vermelha Brasileira, Curitiba, PR; Adriana Valenti, Centro de Pesquisas em Diabetes, Porto Alegre, RS; Enio Vasques, Núcleo de Medicina Integrada, Mogi das Cruzes, SP; Sergio Vencio, Instituto de Ciências Farmacêuticas de Estudos e Pesquisas, Aparecida de Goiânia, GO; André Vianna, Centro de Diabetes Curitiba, Curitiba, PR; Thiago Munhoz Vidotto, Centro de Pesquisa Clínica em Diabetes, Hospital São Paulo UNIFESP, São Paulo, SP; Suélen Vieira, Instituto de Ensino e Pesquisa do Hospital da Cruz Vermelha Brasileira, Curitiba, PR; Heloisa Villar, Hospital de Clinicas da Faculdade de Medicina de Marília, Marília, SP; Guilherme Visconti, Centro de Pesquisas Clínicas Ltda, São Paulo, SP; Alexei Volaco, Irmandade da Santa Casa de Misericórdia de Curitiba, Unidade de Pesquisa Clínica, Curitiba, PR; Bernardo Wajchenberg, Instituto do Coração do Hospital das Clínicas da Faculdade de Medicina da Universidade de São Paulo, São Paulo, SP; Leila Zanatta, Hospital de Clinicas, Curitiba, PR; Leila Zimmerman, Instituto de Pesquisa Clínica, São Paulo, SP.

*Canada*: E. Carl Abbott, Nova Scotia Health Authority, Halifax, Nova Scotia; Asiru Abu-Bakare, Port Arthur, Ontario; Andrew Advani, St. Michael’s Health Centre, Toronto, Ontario; Roy Allison, Canadian Centre for Research on Diabetes, Smith Falls, Ontario; Phoebe Bishara, Medicine Professional Corporation, Cambridge, Ontario; C. Keith Bowering, Baker Clinic, Edmonton, Alberta; Alice Cheng, Credit Valley Hospital, Mississauga, Ontario; Sylvain Chouinard, Institut Universitaire de Cardiologie et de Pneumologie de Quebec, Quebec; Dale Clayton, Nova Scotia Health Authority, Halifax, Nova Scotia; James Conway, Canadian Centre for Research on Diabetes, Smith Falls, Ontario; Martin D'Amours, CHUL Research Center, Québec; Barna de Tugwell, Nova Scotia Health Authority, Halifax, Nova Scotia; Paul DeYoung, McConnell Medical Centre, Cornwall; Giuseppe D'Ignazio, Canadian Centre for Research on Diabetes, Smith Falls, Ontario; Francois Dube, Institut Universitaire de Cardiologie et de Pneumologie de Quebec, Quebec; Jean-Marie Ekoe, Institut de Recherches Cliniques de Montréal, Montréal, Québec; Susan Fagan, St. John's, Newfoundland; Claude Garceau, Institut Universitaire de Cardiologie et de Pneumologie de Quebec, Quebec; Irving Gottesman, Credit Valley Hospital, Mississauga, Ontario; Amir Hanna, St. Michael’s Health Centre, Toronto, Ontario; Stewart Harris, The Western Centre for Public Health and Family Medicine, London, Ontario; Irene M. Hramiak, St. Joseph's Health Care, London, Ontario; Carmen Hurd, Health Sciences Centre, Winnipeg, Manitoba; S. Imran, Nova Scotia Health Authority, Halifax, Nova Scotia; Robert Josse, St. Michael’s Health Centre, Toronto, Ontario; Carol Joyce, Memorial University of Newfoundland, St. John's, Newfoundland; Stephanie Kaiser, Nova Scotia Health Authority, Halifax, Nova Scotia; Farrukh Khan, Rouge Valley Metabolic Research Centre, Scarborough, Ontario; Isabelle Kirouac, Institut Universitaire de Cardiologie et de Pneumologie de Quebec, Quebec; Christopher Kovacs, Memorial University of Newfoundland, St. John's, Newfoundland; Isabelle Labonte, Institut Universitaire de Cardiologie et de Pneumologie de Quebec, Quebec; W. John Langlois, Credit Valley Hospital, Mississauga, Ontario; Lawrence Leiter, St. Michael’s Health Centre, Toronto, Ontario; Marie-France Levac, McConnell Medical Centre, Cornwall, Canada; Joanne Liutkus, Medicine Professional Corporation, Cambridge, Ontario; Charlotte McDonald, St. Joseph's Health Care, London, Ontario; Vladimir Milosevic, Credit Valley Hospital, Mississauga, Ontario; Bulangu Lukuki Nyomba, Health Sciences Centre, Winnipeg, Manitoba; Terri Paul, St. Joseph's Health Care, London, Ontario; Kathleen Raby, Institut Universitaire de Cardiologie et de Pneumologie de Quebec, Quebec; Thomas Ransom, Nova Scotia Health Authority, Halifax, Nova Scotia; Sonja M. Reichert, The Western Centre for Public Health and Family Medicine, London, Ontario; Ravi Retnakaran, Mount Sinai Hospital, Toronto, Canada; Remi Rabasa-Lhoret, Institut de Recherches Cliniques de Montréal, Montréal, Québec; Errol Raff, Baker Clinic Edmonton, Alberta; Roya Shaikholeslami, Cambridge, Ontario; John Sigalas, Rouge Valley Metabolic Research Centre, Scarborough, Ontario; Churn-Ern Yip, Nova Scotia Health Authority, Halifax, Nova Scotia; S. John Weisnagel, CHUL Research Center, Québec, Canada; Vincent Woo, Health Sciences Centre, Winnipeg, Manitoba; Bernard Zinman, Mount Sinai Hospital, Toronto, Canada.

*China*: Yi Bao, Shanghai Changzheng Hospital, Shanghai; Xiaoling Cai, Peking University People’s Hospital, Beijing; Jiangtian Chen, Peking University People’s Hospital, Beijing; Kang Chen, Chinese PLA General Hospital, Beijing; Meiling Chen, Chinese PLA General Hospital, Beijing; Xia Chen, the Affiliated Hospital of Jiangsu University, Jiangsu; Yingli Chen, Peking University People’s Hospital, Beijing; Linong Ji, Peking University People’s Hospital, Beijing; Yang Ji, The affiliated hospital of Qingdao University, Shandong Province; Juan Lei, Sun Yat-sen memorial Hospital, Sun Yat-sen University, Guangzhou; Hongbing Li, Beijing Tongren Hospital, Beijing; Peijing Liu, the Affiliated Hospital of Jiangsu University, Jiangsu; Yiming Mu, Chinese PLA General Hospital, Beijing; Changyu Pan, Chinese PLA General Hospital, Beijing; Meng Ren, Sun Yat-sen memorial Hospital, Sun Yat-sen University, Guangzhou; Yusheng Ren, Shanghai Changzheng Hospital, Shanghai; Yongquan Shi, Shanghai Changzheng Hospital, Shanghai; Dong Wang, the Affiliated Hospital of Jiangsu University, Jiangsu; Fang Wang, The affiliated hospital of Qingdao University, Shandong Province; Jingjing Wang, Chinese PLA General Hospital, Beijing; Yangang Wang, The affiliated hospital of Qingdao University, Shandong Province; Li Yan, Sun Yat-sen memorial Hospital, Sun Yat-sen University, Guangzhou; Guoqing Yang, Chinese PLA General Hospital, Beijing; Jinkui Yang, Beijing Tongren Hospital, Beijing; Xiaolong Yu, The affiliated hospital of Qingdao University, Shandong Province; Guoyue Yuan, the Affiliated Hospital of Jiangsu University, Jiangsu; Mingtong Xu, Sun Yat-sen memorial Hospital, Sun Yat-sen University, Guangzhou; Xiuli Zhao, Beijing Tongren Hospital, Beijing; Jiaoyang Zheng, Shanghai Changzheng Hospital, Shanghai; Lingli Zhou, Peking University People’s Hospital, Beijing.

*Czech Republic*: Kateřina Anderlová, III. Interní klinika VFN v Praze, U Nemocnice 1, Prague; Jitka Brožová, Diabetologické centrum I. interní kliniky FN Plzeň, Alej Svobody 80, Plzeň; Martin Haluzík, III. Interní klinika VFN a 1. LF UK v Praze, U Nemocnice 1, Prague; Věra Hanušová, III. Interní klinika VFN v Praze, U Nemocnice 1, Praha; Mikuláš Kosák, III. Interní klinika VFN v Praze, U Nemocnice 1, Prague; Jarmila Křížová, III. Interní klinika VFN v Praze, U Nemocnice 1, Prague; Miloš Mráz, III. Interní klinika VFN v Praze, U Nemocnice 1, Prague; Klára Owen, III. Interní klinika VFN v Praze, U Nemocnice 1, Prague; Zdenek Rušavý, Diabetologické centrum I. interní kliniky FN Plzeň, Alej Svobody 80, PIzeň; Jitka Tomešová, Diabetologické centrum I. interní kliniky FN Plzeň, Alej Svobody 80, Plzeň; Pavel Trachta, III. Interní klinika VFN v Praze, U Nemocnice 1, Prague; Michal Žourek, Diabetologické centrum I. interní kliniky FN Plzeň, Alej Svobody 80, PIzeň.

*Denmark*: Per Heden Andersen, Endokrinologisk Ambulatorium, Sydvestjysk Sygehus, Esbjerg; Trine Boesgaard, Steno Diabetes Centre, Gentofte; Sidsel Christensen, Steno Diabetes Centre, Gentofte; Jeppe Gram, Endokrinologisk Ambulatorium, Sydvestjysk Sygehus, Esbjerg; Søren Gregersen, Endokrinologisk Afdeling Medicinsk, MEA, Århus Universitetshospital THG, Århus; Jan Erik Henriksen, Endokrinologisk afdeling M, Odense Universitets Hospital, Odense; Kjeld Hermansen, Endokrinologisk Afdeling Medicinsk, MEA, Århus Universitetshospital THG, Århus; Poul Erik Jakobsen, Endokrinologisk Afdeling , Aalborg Sygehus, Aalborg; Jens Jensen, Endokrinologisk Afdeling Medicinsk, MEA, Århus Universitetshospital THG, Århus; Peter Kristensen, Steno Diabetes Centre, Gentofte; Annesofie Krogsaa, Steno Diabetes Centre, Gentofte; Mette Larsen, Endokrinologisk Afdeling Medicinsk, MEA, Århus Universitetshospital THG, Århus; Hans Henrik Lervang, Endokrinologisk Afdeling, Aalborg Sygehus Aalborg; Sten Madsbad, Medicinsk endokrinologisk amubalatorium, Hvidovre Hospital, Hvidovre; Lene Mortensen, Endokrinologisk Afdeling Medicinsk, MEA, Århus Universitetshospital THG, Århus; Thomas Olesen, Endokrinologisk afdeling M, Odense Universitets Hospital, Odense; Anna Pietraszek, Endokrinologisk Afdeling, Aalborg Sygehus, Aalborg; Martin Ridderstråle, Steno Diabetes Centre, Gentofte; Narges Safai, Steno Diabetes Centre, Gentofte; Anne Grethe Schioldan, Endokrinologisk Afdeling Medicinsk, MEA, Århus Universitetshospital THG, Århus; Christina Schmidt, Endokrinologisk afdeling M, Odense Universitets Hospital, Odense; Ole Snorgaard, Medicinsk endokrinologisk amubalatorium, Hvidovre Hospital, Hvidovre; Jacob Stidsen, Endokrinologisk afdeling M, Odense Universitets Hospital, Odense; Lise Tarnow, Steno Diabetes Center, Gentofte.

*Finland*: Henna Cederberg, Kuopio University Hospital, Kuopio; Hannu Haapamäki, Mehiläinen, Lahti; Janne Hukkanen, Oulu Sisätautien tutkimusyksikkö, Oulu; Raimo Jauhiainen, Kuopio University Hospital, Kuopio; Mona-Lisa Kujari, Oulu Sisätautien tutkimusyksikkö, Oulu; Markku Laakso, Kuopio University Hospital, Kuopio; Jorma Lahtela, Finn-Medi Research Ltd., Tampere; Merja Laine, Myyrmäki Health Centre, Vantaa; Jyrki Mäkelä, Mehiläinen, Lahti; Manna Miilunpohja, Kuopio University Hospital, Kuopio; Markku Savolainen, Oulu Sisätautien tutkimusyksikkö, Oulu; Jyrki Taurio, Finn-Medi Research Ltd., Tampere; Markku Vänttinen, Kuopio University Hospital, Kuopio.

*France*: Christine Creton, Nancy; Valeria Cosma, Hôpital Caremeau, Nîmes; Jean Dillinger, Mondelange; Jean-Luc Jacques, Mars-la-Tour; AnneMarie Guedj, Hôpital Caremeau, Nîmes; Michel Marre, Hôpital Bichat, Paris; Mustapha Moulla, Pont-à-Mousson; Catherine Petit, Centre Hospitalier Général Sud Francilien, Corbeil-Essonnes; Victor Ratsianoharana, Bousse; Dominique Richter, Jarny; Michel Rodier, Hôpital Caremeau, Nimes; Ronan Roussel, Service de Diabétologie, Hôpital Bichat, Paris; Florence Travert, Service de Diabétologie, Hôpital Bichat, Paris.

*Germany*: Andrea Hinz, Diabetologische Schwerpunktpraxis, Gifhorn; Eberhard Politz, Diabetologische Schwerpunktpraxis, Gifhorn; Michael Esser, Praxis Esser, Essen; Ulrich Deuse, Praxis Esser, Essen; Dirk Mittag, Zentrum für Klinische Studien Südbrandenburg GmbH, Elsterwerda; Andreas Hagenow, Zentrum für Klinische Studien Südbrandenburg GmbH, Elsterwerda; Frohmut Jacob, Praxis für Prävention und Therapie, Villingen-Schwenningen; Stephan Jacob, Praxis für Prävention und Therapie, Villingen-Schwenningen; Ralf Jordan, Clintrial Berlin Praxis für Medizinische Studien, Berlin; Dominique Gantke, Clintrial Berlin Praxis für Medizinische Studien, Berlin; Ulrike Venschott-Jordan, ClinTrial Berlin c/o Diabetologie Steglitz, Berlin; Carmen Löhr, Studienzentrum, Aschaffenburg; Gerhard Klausmann, Studienzentrum, Aschaffenburg; Karin Eschenbrücher, Studienzentrum, Aschaffenburg; Mahir Karakas, Universitätsklinikum Ulm Innere Medizin II, Ulm; Bernd Jahrsdörfer, Universitätsklinikum Ulm Innere Medizin II, Ulm; Markus Rolf Kunze, Universitätsklinikum Ulm Innere Medizin II, Ulm; Jochen Wöhrle, Universitätsklinikum Ulm Innere Medizin II, Ulm; Wolfgang König, Universitätsklinikum Ulm Innere Medizin II, Ulm; Heike Spielhagen, Praxis Dr. med. J Lüdemann, Falkensee; Adam Kilimnik, Praxis Dr. med. J Lüdemann, Falkensee; Hans-Peter Lüdemann, Praxis Dr. med. J Lüdemann, Falkensee; Jörg Lüdemann, Praxis Dr. med. J Lüdemann, Falkensee; Andrea Mölle, Diabetologicum Dresden, Dresden; Matthias Mölle, Diabetologicum Dresden, Dresden; Joachim Müller, Ambulanzzentrum, Schweinfurt; Steffi Appelt, Ambulanzzentrum, Schweinfurt; Anke Sauter, Praxis Sauter & Sauter & Hartmann, Wangen; Joachim Sauter, Praxis Sauter & Sauter & Hartmann, Wangen; Ulrike Hartmann, Praxis Sauter & Sauter & Hartmann, Wangen; Anja Löw, Medizinische Klinik LMU Präventive Kardiologie, München; Florian Krötz, Medizinische Klinik LMU Präventive Kardiologie, München; Hae-Young Sohn, Medizinische Klinik LMU Präventive Kardiologie, München; Clemens von Schacky, Medizinische Klinik LMU Präventive Kardiologie, München; Volker Klauss, Medizinische Klinik LMU Präventive Kardiologie, München; Desiree Braun, Gemeinschaftspraxis Segner & Braun, St. Ingbert; Alexander Segner, Gemeinschaftspraxis Segner & Braun, St. Ingbert; Elizaveta Degtyareva, Synexus Clinical Research GmbH, Leipzig; Kristin Kreutzmann, GWT-TUD GmbH, Zentrum für Klinische Studien Forschungsbereich Endokrinologie und Stoffwechsel, Dresden; Rita Paschmionka, Synexus Clinical Research GmbH, Leipzig; Nora Hauck, Synexus Clinical Research GmbH, Leipzig; Olena Sihal, Synexus Clinical Research GmbH, Leipzig; Anne-Kathrin Busch, Synexus Clinical Research GmbH, Leipzig; Olga Maus, Synexus Clinical Research GmbH, Leipzig; Petra Stübler, Landteilstr 24, 68163 Mannheim; Sabine Füllgraf-Horst, Landteilstr 24, 68163 Mannheim; Angelika Vietzke, Studienzentrum in Berlin, Berlin; Christine Müller, Studienzentrum in Berlin, Berlin; Regina Tosch-Sisting, Studienzentrum in Berlin, Berlin; Bianca Lengsfeld, RED-Institut für medizinische Studien und Fortbildung GmbH, Oldenburg; Julia Thaler, RED-Institut für medizinische Studien und Fortbildung GmbH, Oldenburg; Thomas Schaum, RED-Institut für medizinische Studien und Fortbildung GmbH, Oldenburg; Joerg Steindorf, Diabetes-Schwerpunktpraxis, Schkeuditz; Sandra Steindorf, Diabetes-Schwerpunktpraxis, Schkeuditz; Alexander König, Klemens-Mengele Str. 10, 89407 Dillingen; Stefan Reitschuster, Klemens-Mengele Str. 10, 89407 Dillingen; Daniel Schlott, Blankeneser Bahnhofstr 23, 22587 Hamburg; Hans-Ulrich Clever, Blankeneser Bahnhofstr 23, 22587 Hamburg; Peter Witzel, Blankeneser Bahnhofstr 23, 22587 Hamburg; Hans-Peter Kempe, Gemeinschaftspraxis Dr. med. Kempe Dr. med. Stemler, Ludwigshafen; Lutz Stemler, Gemeinschaftspraxis Dr. med. Kempe Dr. med. Stemler, Ludwigshafen.

*Greece*: Apostolos Benis, “Thermi” Private Hospital, Thessaloniki; Marian Benroubi, Athens Polyclinic General Hospital, Athens; Evanthia Diakoumopoulou, Diabetes Centre, Laiko General Hospital of Athens, Athens; Kyriakos Kazakos, “Thermi” Private Hospital, Thessaloniki; Nikolaos Kypraios, Athens Polyclinic General Hospital, Athens; Stavros Liatis, Diabetes Centre, Laiko General Hospital of Athens, Athens; Emmanouil Pagkalos, “Thermi” Private Hospital, Thessaloniki; Evangelia Siami, Laiko General Hospital of Athens, Athens; Nikolaos Tentolouris, Diabetes Centre, Laiko General Hospital of Athens, Athens.

*India*: Varun Chandra Alur, Department of Endocrinology and Diabetes, Amrita Institute of Medical Sciences, Kerala; Megha Agrawal, TOTALL Diabetes Hormone Institute, Indore; Mazher Ali, CARE Outpatient Centre, Babu Khan Chambers, Hyderabad; Arthur Asirvatham, Kuruvikaran Salai, Madurai, Tamil Nadu; Evelyn Asirvatham, Kuruvikaran Salai, Madurai, Tamil Nadu; Tushar R Bandgar, Seth GS Medical College & KEM Hospital, Parel, Mumbai; Madhuri Balaji, Diabetes Research Institute, Chennai; Neil Bardoloi, Excel Care Hospitals, Ulubari, Guwahati; Manash Baruah, Excel Care Hospitals, Ulubari, Guwahati; Ragini Bekur, Kasturba Hospital, Manipal, Karnataka; Anil Bhansali, Postgraduate Institute of Medical Education and Research, Chandigarh; Sumith Bhatia, Kasturba Hospital, Manipal, Karnataka; Suchitra Bhonsley, Bangalore Clinisearch, Kalyan Nagar, Bangalore, Karnataka; Sonali Bhuyan, Excel Care Hospitals, Ulubari, Guwahati; Bidyut Borah, Christian Medical College, Vellore, Tamil Nadu; Nancy Bright, Bangalore Clinisearch, Kalyan Nagar, Bangalore, Karnataka; Ambrish C, Bangalore Clinisearch, Kalyan Nagar, Bangalore, Karnataka; Tirthankar Chaudhury, Apollo Gleneagles Hospital, Kolkata, West Bengal; Sapna Choudhury, TOTALL Diabetes Hormone Institute, Indore; Gopi Chellan, Department of Endocrinology and Diabetes, Amrita Institute of Medical Sciences, Kerala; Mrinal Das, Apollo Gleneagles Hospital, Kolkata, West Bengal; Mala Dharmalingam, Bangalore Endocrinology & Diabetes Research Centre, Malleshwaram, Bangalore, Karnataka; Pinaki Dutta, Postgraduate Institute of Medical Education and Research, Chandigarh; Anil Erugu, Christian Medical College, Vellore, Tamil Nadu; Vinutha F P, Bangalore Endocrinology & Diabetes Research Centre, Malleshwaram, Bangalore, Karanataka; Prasad Gunasekaran, Christian Medical College, Vellore, Tamil Nadu; Riddhi Das Gupta, Christian Medical College, Vellore, Tamil Nadu; Asif Iqbal, Kasturba Hospital, Manipal, Karnataka; Padoor Jagadish, Madras Diabetes Research Foundation, Chennai, Tamil Nadu; Sanjay Jain, TOTALL Diabetes Hormone Institute, Indore; Sunil Jain, TOTALL Diabetes Hormone Institute, Indore; Helen Jebasingh, Kuruvikaran Salai, Madurai, Tamil Nadu; Anulekha John, Christian Medical College, Vellore, Tamil Nadu; Maya John, Jothydev's Diabetes & Research Center, Kerala; Bharti Kalra, Bharti Research Institute of Diabetes & Endocrinology, Karnal, Haryana; Sanjay Kalra, Bharti Research Institute of Diabetes & Endocrinology, Karnal, Haryana; Prakash Kasaragod, Department of Endocrinology and Diabetes, Amrita Institute of Medical Sciences, Kerala; Jothydev Kesavadev, Jothydev's Diabetes & Research Center, Kerala; Harish Kumar, Department of Endocrinology and Diabetes, Amrita Institute of Medical Sciences, Kerala; Prasanna Kumar, Bangalore Diabetes Hospital, Vasanth Nagar Bangalore, Karnataka; Vivek Lakshmanan, Department of Endocrinology and Diabetes, Amrita Institute of Medical Sciences, Kerala; Anurag Ranjan Lila, Seth GS Medical College & KEM Hospital, Parel, Mumbai; Tom Mathew, Jothydev's Diabetes & Research Center, Kerala; Hameed Miyen, Bangalore Clinisearch, Kalyan Nagar, Bangalore, Karnataka; Tara Mohan, Jothydev's Diabetes & Research Center, Kerala; Ashwin Motha, Christian Medical College, Vellore, Tamil Nadu; Chaithanya Murthy, Christian Medical College, Vellore, Tamil Nadu; Shivashankara N, Kasturba Hospital, Manipal, Karnataka; Amrit Nanaiah, Christian Medical College, Vellore, Tamil Nadu; Tittu Ommen, Department of Endocrinology and Diabetes, Amrita Institute of Medical Sciences, Kerala; Keshava Pani, Bangalore Clinisearch, Kalyan Nagar Bangalore, Karnataka; Kirnesh Pandey, TOTALL Diabetes Hormone Institute, Indore; Shamanna Paramesh, Bangalore Clinisearch, Kalyan Nagar, Bangalore, Karnataka; Vijayalakshmi Paramesh, Bangalore Diabetes Centre, Kalyan Nagar Bangalore, Karnataka; Binu Pillai, Department of Endocrinology and Diabetes, Amrita Institute of Medical Sciences, Kerala; Mukhyaprana Prabhu, Kasturba Hospital, Manipal, Karnataka; Kalki R.C, Christian Medical College, Vellore, Tamil Nadu; Saritha Ramachandran, Bangalore Diabetes Hospital, Vasanth Nagar Bangalore, Karnataka; Muthu Ramu, Madras Diabetes Research Foundation, Chennai, Tamil Nadu; Yashwanth Rao, Kasturba Hospital, Manipal, Karnataka; Sanjay Reddy, Bangalore Diabetes Hospital, Bangalore Vasanth Nagar, Bangalore, Karnataka; Padma Saikia, Bangalore Clinisearch, Kalyan Nagar, Bangalore, Karnataka; Kavitha Saravu, Kasturba Hospital, Manipal, Karnataka; Kasthuri Selvam, Madras Diabetes Research Foundation, Chennai, Tamil Nadu; Bipin Sethi, CARE Outpatient Centre, Babu Khan Chambers, Hyderabad; Arun Shankar, Jothydev's Diabetes & Research Center, Karala; Amit Sharma, Bharti Research Institute of Diabetes & Endocrinology, Karnal, Haryana ; Nalini Shah, Seth GS Medical College & KEM Hospital, Parel, Mumbai; Priti Shankar, Bangalore Endocrinology & Diabetes Research Centre, Malleshwaram, Bangalore, Karanataka; Ranjan Shetty, Kasturba Hospital, Manipal, Karnataka; Vyankatesh Shivane, Seth GS Medical College & KEM Hospital, Parel, Mumbai; Sudha Srivalli, Bangalore Clinisearch, Kalyan Nagar, Bangalore, Karnataka; Sufiya Thaseen, Christian Medical College, Vellore, Tamil Nadu; Nihal Thomas, Christian Medical College, Vellore, Tamil Nadu; Sarada S, Christian Medical College, Vellore, Tamil Nadu; Amanchi Shirisha, Christian Medical College, Vellore, Tamil Nadu; Manvizhi Subramani, Christian Medical College, Vellore, Tamil Nadu; Balaji V, Diabetes Research Institute, Chennai; Mohan V, Madras Diabetes Research Foundation, Chennai, Tamil Nadu; Padmanaban V, Christian Medical College, Vellore, Tamil Nadu; Muralidhar Verma, Kasturba Hospital, Manipal, Karnataka; Sudha Vidyasagar, Kasturba Hospital, Manipal, Karnataka; Vidya Walinjkar, Madras Diabetes Research Foundation, Chennai, Tamil Nadu; Rama Walia, Postgraduate Institute of Medical Education and Research, Chandigarh.

*Ireland*: Colin Davenport, Beaumont Hospital, Dublin; Hannah Forde, Beaumont Hospital, Dublin; Gaoatswe Gadintshware, Diabetes Day Centre, St Vincent's University Hospital, Dublin; KJ Gan, St Vincent's University Hospital, Dublin; Frances Hayes, St Vincent's University Hospital, Dublin; Aftab Khattak, St Vincent's University Hospital, Dublin; Jean O'Connell, St Vincent's University Hospital, Dublin; Donal O'Shea, St Vincent's University Hospital, Dublin; Diarmuid Smith, Beaumont Hospital, Dublin.

*Israel*: Victorya Beilin, Rabin Medical Center, Hasharon Hospital, Petah Tikva; Avivit Cahn, Diabetes Unit, Hadassah Ein Karem Medical Center, Jerusalem; Ohad Cohen, Institute of Endocrinology Sheba Medical Center, Tel HaShomer; Tali Cukierman-Yaffe, Institute of Endocrinology, Sheba Medical Center, Tel HaShomer; Deeb Daoud, Rambam Medical Center, Haifa; Mahmud Darawsha, Lin Medical Center, Haifa; Dror Dicker, Rabin Medical Center, Hasharon Hospital, Petah Tikva; Alex Gavish, Diabetes Unit, Hadassah Ein Karem Medical Center, Jerusalem; Irit Hochberg, Rambam Medical Center, Haifa; Jacob Ilany, Institute of Endocrinology Sheba Medical Center, Tel HaShomer; Uri Inbal, Institute of Endocrinology, Sheba Medical Center, Tel HaShomer; Baruch Itzhak, Lin Medical Center, Haifa; Avraham Karasik, Institute of Endocrinology, Sheba Medical Center, Tel HaShomer; Eddy Karnieli, Rambam Medical Center, Haifa; Nader Khader, Lin Medical Center, Haifa; Mogher Khamaisi, Rambam Medical Center, Haifa; Dan Lender, Diabetes Unit, Hadassah Ein Karem Medical Center, Jerusalem; Gabriella Segal Lieberman, Institute of Endocrinology, Sheba Medical Center, Tel HaShomer; Riad Mahamid, Rambam Medical Center, Haifa; Dana Marcoviciu, Rabin Medical Center - Hasharon Hospital, Petah Tikva; Leonid Michael, Institute of Endocrinology, Sheba Medical Center, Tel HaShomer; Oscar Minuchin, Lin Medical Center, Haifa; Ofri Mosenzon, Diabetes Unit, Hadassah Ein Karem Medical Center, Jerusalem; Feige Narevichius, Rambam Medical Center, Haifa; Ruth Percik, Institute of Endocrinology, Sheba Medical Center, Tel HaShomer; Marina Potekhin, Diabetes Unit, Hadassah Ein Karem Medical Center, Jerusalem; Itamar Raz, Diabetes Unit, Hadassah Ein Karem Medical Center, Jerusalem; Muhammad Sabbah, Lin Medical Center, Haifa; Said Sawaed, Lin Medical Center, Haifa; Daniel Schurr, Diabetes Unit, Hadassah Ein Karem Medical Center, Jerusalem; Elena Segal, Rambam Medical Center, Haifa; Ladislav Slezak, Lin Medical Center, Haifa; Ira Vollach, Institute of Endocrinology, Sheba Medical Center, Tel HaShomer; Adnan Zaina, Rambam Medical Center, Haifa; Moshe Zloczower, Rambam Medical Center, Haifa; Sagit Zolotov, Rambam Medical Center, Haifa.

*Italy*: Alessandro Antenore, Azienda Ospedaliero Universitaria Careggi, Firenze; Mariangela Arnone, Azienda Ospedaliera Universitaria Policlinico Paolo Giaccone, Palermo; Franco Arturi, Policlinico Mater Domini Università di Catanzaro Campus Germaneto, Catanzaro; Valeria Barbaro, Azienda Ospedaliero Universitaria Careggi, Firenze; Milena Barone, Policlinico Mater Domini Università di Catanzaro Campus Germaneto, Catanzaro; Rosamaria Di Biagio, Università degli Studi Gabriele d'Annunzio, Chieti; Chiara Buscemi, Azienda Ospedaliera Universitaria Policlinico Paolo Giaccone, Palermo; Silvio Buscemi, Azienda Ospedaliera Universitaria Policlinico Paolo Giaccone, Palermo; Raffaella Buzzetti, Ospedale Santa Maria Goretti, Latina; Alberto Di Carlo, Ospedale Civile Campo di Marte, Lucca; Angela Carlone, Ospedale Santa Maria Goretti, Latina; Vittoria Caruso, Policlinico Mater Domini Università di Catanzaro Campus Germaneto, Catanzaro; Ilaria Casadidio, Ospedale Civile Campo di Marte, Lucca; Fernanda Cerrelli, Policlinico Sant Orsola-Malpighi, Bologna; Adolfo Ciavarella, Policlinico Sant Orsola-Malpighi, Bologna; Laura Cipolloni, Ospedale Santa Maria Goretti, Latina; Alessandra Colella, Umberto I - Policlinico di Roma, Roma; Marco Colotto, Umberto I - Policlinico di Roma, Roma; Agostino Consoli, Università degli Studi Gabriele d'Annunzio, Chieti; Valentina Giulia Crippa, Ospedale San Raffaele, Milano; Ilaria Cuccuru, Ospedale Civile Campo di Marte, Lucca; Sabrina Cufone, Policlinico Mater Domini Università di Catanzaro Campus Germaneto, Catanzaro; Carla Desideri, Azienda Ospedaliero Universitaria Careggi, Firenze; Mara Fallarino, Umberto I - Policlinico di Roma, Roma; Fabrizio Febo, Università degli Studi Gabriele d'Annunzio, Chieti; Sebastiano Filetti, Umberto I - Policlinico di Roma, Roma; Chiara Foffi, Ospedale Santa Maria Goretti, Latina; Gloria Formoso, Università degli Studi Gabriele d'Annunzio, Chieti; Laura Frosio, Ospedale San Raffaele, Milano; Patrizia Di Fulvio, Università degli Studi Gabriele d'Annunzio, Chieti; Alessandra Gambineri, Università di Bologna, Azienda Ospedaliera S. Orsola Malpighi, Bologna; Federica Ginestra, Università degli Studi Gabriele d'Annunzio, Chieti; Michele Salvatore Grimaldi, Policlinico Sant Orsola-Malpighi, Bologna; Caterina Lamanna, Azienda Ospedaliero Universitaria Careggi, Firenze; Gaetano Leto, Ospedale Santa Maria Goretti, Latina; Pietro Lucotti, Ospedale San Raffaele, Milano; Marina Lugarà, Policlinico Mater Domini Università di Catanzaro Campus Germaneto, Catanzaro; Gabriella Lumera, Ospedale San Raffaele, Milano; Andrea Magistro, Ospedale San Raffaele, Milano; Edoardo Mannucci, Azienda Ospedaliero Universitaria Careggi, Firenze; Marianna Maranghi, Umberto I - Policlinico di Roma, Roma; Daniele Martelli, Azienda Ospedaliero Universitaria Careggi, Firenze; Alessandro Mattina, Azienda Ospedaliera Universitaria Policlinico Paolo Giaccone, Palermo; Lucilla D. Monti, Ospedale San Raffaele, Milano; Martina Parise, Policlinico Mater Domini Università di Catanzaro Campus Germaneto, Catanzaro; Elisabetta Pedace, Policlinico Mater Domini Università di Catanzaro Campus Germaneto, Catanzaro; Francesca Perticone, Ospedale San Raffaele, Milano; PierMarco Piatti, Ospedale San Raffaele, Milano; Maria Pompea Antonia Baldassarre, Università degli Studi Gabriele d'Annunzio, Chieti; Benedetta Ragghianti, Azienda Ospedaliero Universitaria Careggi, Firenze; Andrea Repaci, Università di Bologna, Azienda Ospedaliera S. Orsola Malpighi, Bologna; Danilo Ribichini, Università di Bologna, Azienda Ospedaliera S. Orsola Malpighi, Bologna; Silvia Da Ros, Umberto I - Policlinico di Roma, Roma; Margherita Rossi, Ospedale San Raffaele, Milano; Marcella Santilli, Umberto I - Policlinico di Roma, Roma; Giorgio Sesti, Policlinico Mater Domini Università di Catanzaro Campus Germaneto, Catanzaro; Emanuela Setola, Ospedale San Raffaele, Milano; Ermal Shehaj, Ospedale San Raffaele, Milano; Elena Succurro, Policlinico Mater Domini Università di Catanzaro Campus Germaneto, Catanzaro; Elodia Sussolano, Umberto I - Policlinico di Roma, Roma; Giovanna Tarquini, Umberto I - Policlinico di Roma, Roma; Salvatore Verga, Azienda Ospedaliera Universitaria Policlinico Paolo Giaccone, Palermo; Valentina Vitale, Azienda Ospedaliero Universitaria Careggi, Firenze.

*Mexico*: Ricardo Rodríguez Alanis, Hospital Universitario Dr. José Eleuterio González, Monterrey; María del Rosario Arechavaleta-Granell, Unidad de Patologia Clínica, Guadalajara; Teresita de Jesús Beltran Jaramillo, Unidad de Patologia Clínica, Guadalajara; David Amador de Jesús Rodríguez Berrones, Hospital Universitario Dr. José Eleuterio González, Monterrey; Ignacio Rodríguez Briones, Cardioarritmias e Investigación, S.C., San Luis Potosí; Rocio Rodríguez Briones, Cardioarritmias e Investigación, S.C., San Luis Potosí; Eduardo Saúl Acevedo Castañeda, Instituto Jalisciense de Investigación en Diabetes y Obesidad, S.C., Guadalajara; Jesus Benito Chapa Grimaldo, Hospital Universitario Dr. José Eleuterio González, Monterrey; Claudia Aida Flores-Moreno, Hospital Universitario Dr. José Eleuterio González, Monterrey; Sandra Garza Felix, Hospital Universitario Dr. José Eleuterio González, Monterrey; Jesus Nieto Flores, Instituto Jalisciense de Investigación en Diabetes y Obesidad, Guadalajara; Guadalupe Morales Franco, Centro de Diabetes Durango, Durango; Ricardo Aarón Garza Morán, Hospital Universitario Dr. José Eleuterio Gonzalez, Monterrey; Sandra Ofelia Hernández González, Investigación Clínica Especializada, Guadalajara; Guillermo González-Gálvez, Instituto Jalisciense de Investigación en Diabetes y Obesidad, S.C., Guadalajara; José Gerardo González González, Hospital Universitario Dr. José Eleuterio González, Monterrey; Eduardo Hernández Salazar, Unidad de Patologia Clínica, Guadalajara; Pedro Alberto García Hernández, Hospital Universitario Dr. José Eleuterio González, Monterrey; Sandra Campos Hurtado, Centro de Diabetes Durango, Durango; Martha Leticia López-Velázco, Instituto Jalisciense de Investigación en Diabetes y Obesidad, S.C., Guadalajara; Ernesto Germán Cardona Muñóz, Investigación Clínica Especializada, Guadalajara; Ricardo Nuñez Márquez, Unidad de Patologia Clínica, Guadalajara; Oscar Vladimir Campos Moreno, Centro de Diabetes Durango, Durango; Francisco Javier Cavazos Oliveros, Hospital Universitario Dr. José Eleuterio González, Monterrey; Jose Alfredo Haro Ortiz, Cardioarritmias e Investigación, S.C., San Luis Potosí; Emilia Susana Pelayo-Orozco, Instituto Jalisciense de Investigación en Diabetes y Obesidad, S.C., Guadalajara; Paulina Sida Perez, CardioPrevent S.C., Durango; Roxana Vazquez Ramírez, Hospital Universitario Dr. José Eleuterio González, Monterrey; Marittza A. Uribe Rios, CardioPrevent S.C., Durango; Julio César López Rodríguez, Hospital Universitario Dr. José Eleuterio González, Monterrey; Mónica Rodríguez Rosales, Hospital Universitario Dr. José Eleuterio Gonzalez, Monterrey; Israel Robledo Durón, Unidad de Patologia Clínica, Guadalajara; Ricardo Alvarado Ruíz, CardioPrevent S.C., Durango; Gerardo González Saldivar, Hospital Universitario Dr. José Eleuterio González, Monterrey; Roxana Reyes Sánchez, CardioPrevent S.C., Durango; Blanca Leticia Sánchez-Michel, Instituto Jalisciense de Investigación en Diabetes y Obesidad, S.C, Guadalajara; Aleida Yael Contreras Sandoval, Unidad de Patologia Clínica, Guadalajara; Arturo Velasco Gutiérrez, Instituto Jalisciense de Investigación en Diabetes y Obesidad, S.C., Guadalajara; Ana Elena Perez Verdín, Instituto Jalisciense de Investigación en Diabetes y Obesidad, S.C., Guadalajara; María Guadalupe Ramos Zavala, Investigación Clínica Especializada, Guadalajara.

*Netherlands*: Evertine Abbink-Zandbergen, Radboud University Medical Centre, Nijmegen; Mohamed Ahdi, Slotervaart Ziekenhuis, Amsterdam; Annemiek Bugter, SHL-Groep, Etten-Leur; Marcel van Dijk, University Medical Center Utrecht, Utrecht; Geert Eisma, SHL-Groep, Etten-Leur; Ronald Erdtsieck, Máxima Medisch Centrum, Eindhoven; Maaike Gerards, Slotervaart Ziekenhuis, Amsterdam; Victor Gerdes, Slotervaart Ziekenhuis, Amsterdam; Harm Haak, Máxima Medisch Centrum, Eindhoven; Veroniek Harbers, Radboud University Medical Centre, Nijmegen; Klaas Hoogenberg, Martini Ziekenhuis, Groningen; Frank Huvers, Bethesda Diabetes Research Center, Hoogeveen; Wilbert Janssen, Martini Ziekenhuis, Groningen; Marleen Kars, Academic Hospital Maastricht, Maastricht; Adriaan Kooy, Bethesda Diabetes Research Center, Hoogeveen; M. Lafeber, University Medical Center Utrecht, Utrecht; Sabine Landewé-Cleuren, Academic Hospital Maastricht, Maastricht; Aloysius Lieverse, Máxima Medisch Centrum, Eindhoven; Eelco Meesters, Slotervaart Ziekenhuis, Amsterdam; Sharon Moerman, Divisie Julius Centrum, University Medical Center Utrecht, Utrecht; Dirk van Moorsel, Academic Hospital Maastricht, Maastricht; Jeroen Nijhuis, Academic Hospital Maastricht, Maastricht; Guy Rutten, University Medical Center Utrecht, Utrecht; C.J Smit, Martini Ziekenhuis, Groningen; Cornelius Tack, Radboud University Medical Centre, Nijmegen; Kristof Thevissen, Máxima Medisch Centrum, Eindhoven; Dirk Meijer Timmerman Thijssen, SHL-Groep, Etten-Leur; Annelieke Willemsen, Máxima Medisch Centrum, Eindhoven.

*Norway*: Kåre Birkeland, Endokrinologisk Avdeling, Oslo Universitetssykehus, Oslo; John Cooper, Stavanger Helseforskning, Stavanger; Hanne Gulseth, Oslo Universitetssykehus, Oslo; Jøran Hjelmesæth, Senter for Sykelig Overvekt, Tønsberg; Pål Jørgensen, Endokrinologisk Seksjon, Medisinsk avdeling, Trondheim; Bente K. Kilhovd, Oslo Universitetssykehus, Oslo; Bård Kulseng, Endokrinologisk Seksjon, Medisinsk Avdeling, Trondheim; Bjørn Nicolaisen, Endokrinologisk Seksjon, Medisinsk Avdeling, Trondheim; Øivind Skadberg, Stavanger Helseforskning, Stavanger, Njord Nordstrand, Senter for sykelig overvekt, Tønsberg; Cecilie Wium, Endokrinologisk Avdeling, Oslo Universitetssykehus, Oslo.

*Poland*: Karolina Antkowiak-Piatyszek, Synexus Polska Sp, Warszawa; Malgorzata Arciszewska, NZOZ Specjalistyczny Ośrodek InternistycznoDiabetologiczny, Białystok; Agnieszka Bajkowska-Fiedziukiewicz, Centrum Medyczne OmniMed, Lodz; Pawel Bogdanski, Oddział Nadciśnienia Tętniczego i Zaburzeń Metabolicznych, Katedra i Klinika Chorób Wewnętrznych, Zaburzeń Metabolicznych i Nadciśnienia Tętniczego Uniwersytetu Medycznego im. K. Marcinkowskiego w Poznaniu, Poznan; Urszula Czubek, UNICARDIA Specjalistyczne Centrum Leczenia Chorob Serca i Naczyn & UNIMEDICA Specjalistyczne Centrum Medyczne, Kraków; Katarzyna Cypryk, Centrum Medyczne OmniMed, Lodz; Jan Dabrowski, Centrum Medyczne OmniMed, Lodz; Magda Dabrowska, Synexus Polska Sp, Warszawa;Marek Dwojak, Synexus Polska Sp, Wrocław; Szymon Dziedzic, Śląskie Centrum Osteoporozy, Katowice; Tomasz Dziewit, Śląskie Centrum Osteoporozy, Katowice; Magdalena Faligowska, Synexus Polska Sp, Warszawa; Grazyna Fedor-Plenkowska, Medyczne Centrum Diabetologiczno-Endokrynologiczno-Metaboliczne “Diab-EndoMet”, Kraków; Edward Franek, Centralny Szpital Kliniczny MSW w Warszawie, Warszawa; Grzegorz Gajos, UNICARDIA Specjalistyczne Centrum Leczenia Chorob Serca i Naczyn & UNIMEDICA Specjalistyczne Centrum Medyczne, Kraków; Danuta Galicka-Latala, SPZOZ Uniwersytecki Szpital w Krakowie, Kraków; Alicja Galuszka-Bilinska, Samodzielny Publiczny Zaklad Opieki Zdrowotnej, Ruda Śląska; Izabella Gladysz, Synexus Polska Sp, Warszawa; Joanna Grycewicz, Centrum Medyczne OmniMed, Lodz; Grzegorz Hachula, Śląskie Centrum Osteoporozy, Katowice; Izabela Janas, SPZOZ Uniwersytecki Szpital w Krakowie, Kraków; Ewa Jazwinska-Tarnawska, Synexus Polska Sp, Wrocław; Krystyna Jedynasty, Centralny Szpital Kliniczny MSW w Warszawie, Warszawa; Malgorzata Jozefowska, Centrum Medyczne OmniMed, Lodz; Anna Kaminska, Bydgoskie Centrum Diabetologii i Endokrynologii, Bydgoszcz; Beata Katra, SPZOZ Uniwersytecki Szpital w Krakowie, Kraków; Jolanta Kitowska-Koterla, Śląskie Centrum Osteoporozy, Katowice; Tomasz Klupa, SPZOZ Uniwersytecki Szpital w Krakowie, Kraków; Teresa Koblik, SPZOZ Uniwersytecki Szpital w Krakowie, Kraków; Ewa Konduracka, UNICARDIA Specjalistyczne Centrum Leczenia Chorob Serca i Naczyn & UNIMEDICA Specjalistyczne Centrum Medyczne, Kraków; Jan Konieczny, KO-MED Marek Konieczny Centrum Wielospecjalistycznej Opieki Ambulatoryjnej z Ambulatoryjnym Osrodkiem Zabiegowym, Pulawy; Marek Konieczny, KO-MED Marek Konieczny Centrum Wielospecjalistycznej Opieki Ambulatoryjnej z Ambulatoryjnym Osrodkiem Zabiegowym, Pulawy; Marcin Kosinski, Centrum Medyczne OmniMed, Lodz; Grzegorz Kulkowski, Samodzielny Publiczny Zaklad Opieki Zdrowotnej, Ruda Śląska; Marcin Kunecki, Śląskie Centrum Osteoporozy, Katowice; Malgorzata Kurmaniak, Samodzielny Publiczny Zaklad Opieki Zdrowotnej, Ruda Śląska; Robert Lesniewski, Centralny Szpital Kliniczny MSW w Warszawie, Warszawa; Teresa Lominska, Centralny Szpital Kliniczny MSW w Warszawie, Warszawa; Beata Losa, Samodzielny Publiczny Zaklad Opieki Zdrowotnej, Ruda Śląska; Danuta Majkowska, Medyczne Centrum Diabetologiczno-Endokrynologiczno-Metaboliczne “Diab-Endo-Met”, Kraków; Maciej Malecki, SPZOZ Uniwersytecki Szpital w Krakowie, Kraków; Joanna Mirocka, Medyczne Centrum Diabetologiczno-Endokrynologiczno-Metaboliczne “Diab-EndoMet”, Kraków; Marcin Misztal, UNICARDIA Specjalistyczne Centrum Leczenia Chorob Serca i Naczyn & UNIMEDICA Specjalistyczne Centrum Medyczne, Kraków; Krzysztof Mruk, Medyczne Centrum Diabetologiczno-Endokrynologiczno-Metaboliczne “Diab-Endo-Met”, Kraków; Katarzyna Musialik, Oddział Nadciśnienia Tętniczego i Zaburzeń Metabolicznych, Katedra i Klinika Chorób Wewnętrznych, Zaburzeń Metabolicznych i Nadciśnienia Tętniczego Uniwersytetu Medycznego im. K. Marcinkowskiego w Poznaniu, Poznan; Henryka Olejniczak, Bydgoskie Centrum Diabetologii i Endokrynologii, Bydgoszcz; Piotr Opadczuk, Synexus Polska Sp, Warszawa; Jadwiga Peczynska, NZOZ Specjalistyczny Ośrodek Internistyczno-Diabetologiczny, Białystok; Maria Plinta, Medyczne Centrum Diabetologiczno-Endokrynologiczno-Metaboliczne “Diab-Endo-Met”, Kraków; Miroslawa Polaszewska-Muszynska, Bydgoskie Centrum Diabetologii i Endokrynologii, Bydgoszcz; Elzbieta Przech, Centrum Medyczne OmniMed, Lodz; Danuta Pupek-Musialik, Oddział Nadciśnienia Tętniczego i Zaburzeń Metabolicznych, Katedra i Klinika Chorób Wewnętrznych, Zaburzeń Metabolicznych i Nadciśnienia Tętniczego Uniwersytetu Medycznego im. K. Marcinkowskiego w Poznaniu, Poznan;Zofia Ruzga, Synexus Polska Sp, Wrocław; Zdzislawa Scibor, Centrum Medyczne OmniMed, Lodz; Anna Sidorowicz-Bialynicka, Synexus Polska Sp, Wrocław; Anna Siegel, Śląskie Centrum Osteoporozy, Katowice; Andrzej Stankiewicz, Medyczne Centrum Diabetologiczno-Endokrynologiczno-Metaboliczne “Diab-Endo-Met”, Kraków; Agnieszka Strzelecka-Sosik, KO-MED Marek Konieczny Centrum Wielospecjalistycznej Opieki Ambulatoryjnej z Ambulatoryjnym Osrodkiem Zabiegowym, Pulawy;Teresa Swierszcz, NZOZ Specjalistyczny Ośrodek Internistyczno-Diabetologiczny, Białystok; Monika Szulinska, Oddział Nadciśnienia Tętniczego i Zaburzeń Metabolicznych, Katedra i Klinika Chorób Wewnętrznych, Zaburzeń Metabolicznych i Nadciśnienia Tętniczego Uniwersytetu Medycznego im. K. Marcinkowskiego w Poznaniu, Poznan; Katarzyna Szymkowiak, Synexus Polska Sp, Wrocław; Iwona Trybul, SPZOZ Uniwersytecki Szpital w Krakowie, Kraków; Przemyslaw Witek, SPZOZ Uniwersytecki Szpital w Krakowie, Kraków; Iwona Wozniak, KO-MED Marek Konieczny Centrum Wielospecjalistycznej Opieki Ambulatoryjnej z Ambulatoryjnym Osrodkiem Zabiegowym, Pulawy; Jan Zambrzycki, Synexus Polska Sp, Warszawa; Grazyna Zarzycka-Lindner, Bydgoskie Centrum Diabetologii i Endokrynologii, Bydgoszcz; Dorota Zuradzka-Wajda, Medyczne Centrum Diabetologiczno-Endokrynologiczno-Metaboliczne “Diab-Endo-Met”, Kraków; Monika Zurawska-Klis, Centrum Medyczne OmniMed, Lodz.

*Republic of Korea*: Hwa Young Ahn, Seoul National University Bundang Hospital, Seongnam; Sang Ouk Chin, Kyung-hee University Medical Center, Seoul; Sung Hee Choi, Seoul National University Bundang Hospital, Seongnam; Suk Chon, Kyung-hee University Medical Center, Seoul; Kyung Ah Han, Eulji General Hospital, Seoul; Hak Chul Jang, Seoul National University Bundang Hospital, Seongnam; Ki Cheon Jeong, National Health Insurance Corporation Ilsan Hospital, Goyang; Seon Mee Kang, Seoul National University Bundang Hospital, Seongnam; Jin Woo Kim, Kyung-hee University Medical Center, Seoul; Hun-Sung Kim, The Catholic University of Korea, Seoul St. Mary's Hospital, Seoul; Soo Joong Kim, Kyung-hee University Medical Center, Seoul; Sung Woon Kim, Kyung-hee University Medical Center, Seoul; Young Seol Kim, Kyung-hee University Medical Center, Seoul; Eun Young Lee, National Health Insurance Corporation Ilsan Hospital, Goyang; Soo Lim, Seoul National University Bundang Hospital, Seongnam; Kyung Wan Min, Eulji General Hospital, Seoul; Joo Young Nam, National Health Insurance Corporation Ilsan Hospital, Goyang; Seung Joon Oh, Kyung-hee University Medical Center, Seoul; So Young Park, Kyung-hee University Medical Center, Seoul; Sang Youl Rhee, Kyung-hee University Medical Center, Seoul; Jung Ah Shin, The Catholic University of Korea, Seoul St. Mary's Hospital, Seoul; Jung Il Son, Kyung-hee University Medical Center, Seoul; Young Duk Song, National Health Insurance Corporation Ilsan Hospital, Goyang; Jeong Taek Woo, Kyung-hee University Medical Center, Seoul; Hae Kyung Yang, The Catholic University of Korea, Seoul St. Mary's Hospital, Seoul; Jeong Seon Yoo, National Health Insurance Corporation Ilsan Hospital, Goyang; Ji Won Yoon, Seoul National University Bundang Hospital, Seongnam; Kun-Ho Yoon, The Catholic University of Korea, Seoul St. Mary's Hospital, Seoul.

*Romania*: Rodica Avram, County Hospital Deva, Deva; Marioara Daniela Braicu, Clinical County Emergency Hospital, Craiova; Luminita Carlan, Bacau County Emergency Hospital, Bacau; Doina Catrinoiu, Emergency County Hospital, Constanta; Daniela Ciomos, Centrul Medical PULS, Târgu Mureș; Alina Ciorba, County Emergency Hospital Satu Mare, Satu Mare; Gheorghe Ghise, Clinical County Hospital Sibiu, Sibiu; Sigina Girgavu, Clinical County Emergency Hospital, Craiova; Cristian Guja, Institute of Diabetes, Nutrition and Metabolic Diseases, Bucharest; Doina Mihai, Institute of Diabetes, Nutrition and Metabolic Diseases, Bucharest; Maria Mota, Clinical County Emergency Hospital, Craiova; Simona Nicodim, Emergency County Hospital, Constanta; Laura Nistor, SC Consultmed SRL, Iasi; Delia Reurean Pintilei, SC Consultmed SRL, Iasi; Ella Pintilei, SC Consultmed SRL, Iasi; Noemi Pletea, Bacau County Emergency Hospital, Bacau; Alina Pop, County Emergency Hospital Satu Mare, Satu Mare; Mihaela Rosu, Clinical County Hospital, Timisoara; Octavian Savu, Institute of Diabetes, Nutrition and Metabolic Diseases, Bucharest; Viorel Serban, Clinical County Hospital, Timisoara; Alexandra Sima, Clinical County Hospital, Timisoara; Carmen Sitterli-Natea, Clinical County Hospital Sibiu, Sibiu; Gina Suciu, Centrul Medical PULS, Târgu Mureș; Monica Szabo, Centrul Medical PULS, Târgu Mureș; Iosif Szilagyi, County Emergency Hospital Satu Mare, Satu Mare; Bogdan Timar, Spitalul Clinic Judetean de Urgenta Timisoara, Timisoara; Adrian Vlad, Clinical County Hospital, Timisoara; Ionela Mihaela Vladu, Clinical County Emergency Hospital, Craiova.

*Russian Federation*: Anas Alfaraj, Central Clinical, Moscow; Veronika Dubova, Yaroslavl Regional Clinical Hospital, Yaroslavl; Irina Dvoryashina, First City Hospital Of Arkhangelsk, Arkhangelsk; Leylya Gaysina, Republic Clinical Hospital, GUZ, Tatarstan; Svetlana Gromova, GUZ Regional Clinical Hospital, Saratov; Ksenia Gudkova, Smolensk State Medical Institute, Smolensk; Svetlana Ivanova, Regional Clinical Hospital, Arkhangelsk; Irina Ivashkina, Penza Regional Clinical Hospital, Penza; Marina Kalashnikova, Propaedeutics of Internal Diseases Clinic, Moscow; Tatyana Kazankova, City Clinical Hospital №5, Barnaul; Elena Khaykina, Smolensk State Medical Institute, Smolensk; Olga Khaykina, Smolensk State Medical Institute, Smolensk; Tatiana Kiseleva, Republic Clinical Hospital, GUZ, Tatarstan; Ekaterina Komissarova, Penza Regional Clinical Hospital, Penza; Irina Kononenko, Institute Of Endocrinology, Moscow; Valeria Koreneva, Central Clinical, Moscow; Olga Koshcheeva, Central Clinical, Moscow; Larisa Koshel, Propaedeutics of internal diseases clinic, Moscow; Dina Kozachuk, Regional Clinical Hospital, Arkhangelsk; Tatiana Kufelkina, Republic Clinical Hospital, GUZ, Tatarstan; Marina Kunitsyna, GUZ Regional Clinical Hospital, Saratov; Natalia Likhodey, Propaedeutics of Internal Diseases Clinic, Moscow; Tatyana Lysenko, City Clinical Hospital №5, Barnaul; Olga Makarova, Tyumen Medical Academy, Tyumen Region; Anna Malceva, City Clinical Hospital №5, Barnaul; Svetlana Mikhailova, Regional Clinical Hospital, Arkhangelsk; Evgeniya Ogorodnikova, City Clinical Hospital №5, Barnaul; Irina Pavlikova, City Clinical Hospital №5, Barnaul; Elena Pekareva, Institute Of Endocrinology, Moscow; Anna Postoeva, First City Hospital Of Arkhangelsk, Arkhangelsk; Dmitry Reshedko, Smolensk State Medical Institute, Smolensk; Galina Reshedko, Smolensk State Medical Institute, Smolensk; Leonid Reshedko, Smolensk State Medical Institute, Smolensk; Angelika Rogaleva, Regional Clinical Hospital, Arkhangelsk; Larisa Rogova, Central Clinical, Moscow; Denis Rozanov, Yaroslavl Regional Clinical Hospital, Yaroslavl; Georgiy Runov, Hospital Of Semashko, Nizhny Novgorod; Irina Samylina, Penza Regional Clinical Hospital, Penza; Tatiana Semikina, GUZ Regional Clinical Hospital, Saratov; Marina Sergeeva-Kondrachenko, Penza Regional Clinical Hospital, Penza; Olga Shatskaya, Institute Of Endocrinology, Moscow; Marina Shestakova, Institute Of Endocrinology, Moscow; Olga Shimokhina, Penza Regional Clinical Hospital, Penza; Svetlana Smetanina, Tyumen Medical Academy, Tyumen Region; Maria Startseva, Regional Clinical Hospital, Arkhangelsk; Alexandra Strelkova, First City Hospital Of Arkhangelsk, Arkhangelsk; Lyudmila Suplotova, Tyumen Medical Academy, Tyumen Region; Larisa Suvorova, GUZ Regional Clinical Hospital, Saratov; Yulia Sych, Propaedeutics of internal diseases clinic, Moscow; Alfiya Valeeva, Kazan State Medical University (KSMU), Kazan; Farida Valeeva, Kazan State Medical University (KSMU), Kazan; Tatiana Venjkova, GUZ Regional Clinical Hospital, Saratov; Valentina Vinokurova, GUZ Regional Clinical Hospital, Saratov; Emma Voychik, Central Clinical, Moscow; Elena Yanovskaya, Yaroslavl Regional Clinical Hospital, Yaroslavl; Maria Yanovskaya, Yaroslavl Regional Clinical Hospital, Yaroslavl; Natalia Yarkova, Hospital Of Semashko, Nizhny Novgorod; Ekaterina Yarygina, Regional Clinical Hospital, Arkhangelsk; Natalia Yuzhakova, Tyumen Medical Academy, Tyumen Region; Tatiana Zakharova, Yaroslavl Regional Clinical Hospital, Yaroslavl; Olga Zanozina, Hospital Of Semashko, Nizhny Novgorod; Anatoly Zenovko, Central Clinical, Moscow; Svetlana Zhuk, Hospital Of Semashko, Nizhny Novgorod; Elena Zhukova, GUZ Regional Clinical Hospital, Saratov.

*Serbia*: Sandra Aleksic, Clinical Center of Serbia, Belgrade; Ana Bulatovic, Clinical Hospital Centre Zvezdara, Belgrade; Bogdan Buric, Clinical Hospital Centre Zvezdara, Belgrade; Goran Cvijovic, Clinical Center of Serbia, Belgrade; Marina Andjelic Jelic, Clinical Hospital Centre Zvezdara, Belgrade; Biljana Jojic, Clinical Hospital Centre Zvezdara, Belgrade; Aleksandra Jotic, Clinical Center of Serbia, Belgrade; Aleksandra Kendereski, Clinical Center of Serbia, Belgrade; Katarina Lalic, Clinical Center of Serbia, Belgrade; Nebojsa Lalic, Clinical Center of Serbia, Belgrade; Ljiljana Lukic, Clinical Center of Serbia, Belgrade; Marija Macesic, Clinical Center of Serbia, Belgrade; Milica Marjanovic Petkovic, Clinical Hospital Centre Zvezdara, Belgrade; Dragan Micic, Clinical Center of Serbia, Belgrade; Tanja Milicic, Clinical Center of Serbia, Belgrade; Ljliljana Popovic, Clinical Center of Serbia, Belgrade; Milica Prostran, Clinical Center of Serbia, Belgrade; Natasa Rajkovic, Clinical Center of Serbia, Belgrade; Jelena Seferovic, Clinical Center of Serbia, Belgrade; Sandra Singh, Clinical Center of Serbia, Belgrade; Radan Stojanovic, Clinical Hospital Centre Zvezdara, Belgrade; Ljubica Stosic, Clinical Center of Serbia, Belgrade; Miljanka Vuksanovic, Clinical Hospital Centre Zvezdara, Belgrade; Miroslava Zamaklar, Clinical Center of Serbia, Belgrade; Teodora Beljic Zivkovic, Clinical Hospital Centre Zvezdara, Belgrade; Svetlana Zoric, Clinical Center of Serbia, Belgrade.

*South Africa*: Nazimuddin Aboo, Centre for Diabetes and Endocrinology, Durban; Hendrik Willem Albertse, Rosepark Hospital, Fichardtpark; Aysha Badat, The Wits Donald Gordon Medical Centre, Johannesburg; Matthys Basson, Tiervlei Trial Centre, Cape Town; Ebrahim Bawa, Dr Lakha's Rooms, Lenasia South; Frederick Bester, Rosepark Hospital, Fichardtpark; Suzanne Blignaut, Tread Research, Cape Town; Susan Booysen, Tread Research, Cape Town; Fredricka Johanna Bosch, Rosepark Hospital, Fichardtpark; Lesley Burgess, Tread Research, Cape Town; Soraya Cassimjee, The Wits Donald Gordon Medical Centre, Johannesburg; Kathleen Coetzee, Tread Research, Cape Town; Jeannine Du Bois, Tiervlei Trial Centre, Cape Town; Johannes Engelbrecht, Mediclinic Vergelegen, Western Cape; Kathleen Finegan, Midrand Medical Centre, Midrand; Gilbert John Gibson, Rosepark Hospital, Fichardtpark; Somaya Hansa, The Wits Donald Gordon Medical Centre, Johannesburg; Alana Hemus, The Wits Donald Gordon Medical Centre, Johannesburg; Ignatius Petrus Immink, Rosepark Hospital, Fichardtpark; Andrew Jacovides, Midrand Medical Centre, Midrand; Pankaj Joshi, Louis Pasteur Medical Center, Pretoria; Shaifali Joshi, Suite 5 Diabetes Care Centre, Benoni; Cornelia Kapp, Union Hospital, Alberton; Setswakae Khoele-Machobane, Midrand Medical Centre, Midrand; Hendrik Johannes Uys Knox, Rosepark Hospital, Fichardtpark; Johanna Kok, Union Hospital, Alberton; Stephanus Komati, Louis Pasteur Medical Center, Pretoria; Evelyn Lai, The Wits Donald Gordon Medical Centre, Johannesburg; Deepak Lakha, Dr Lakha's Rooms, Lenasia South; Kenneilwe Lehloenyane, Tread Research, Cape Town; Akhter Goolam Mahomed, Louis Pasteur Medical Center, Pretoria; Ronel Meeding, The Wits Donald Gordon Medical Centre, Johannesburg; Rajendran Moodley, Netcare Umhlanga Medical Centre, Durban; Naeem Moosa, Moosa N, Lenasia; Jeanne Nel, Tiervlei Trial Centre, Cape Town; Haylene Nell, Tiervlei Trial Centre, Cape Town; Frederick Johannes Van Niekerk, Mediclinic Heart Hospital, Pretoria; Mahommed Omar, Suite 1 Parklands Medical Centre, Durban; Nagassree Pillay, Seadoone Medical Centre, Durban; Maria Pretorius, Tiervlei Trial Centre, Cape Town; Hans Prozesky, Tread Research, Cape Town; Shantakumari Ramduth, Midrand Medical Centre, Midrand; Johannes Roos, Mediclinic Vergelegen, Western Cape; Mahomed Sarvan, Netcare Umhlanga Medical Centre, Durban; Mary Seeber, Mediclinic Heart Hospital, Pretoria; Mirna Siebert, Tiervlei Trial Centre, Cape Town; Pillay Somasundram, Seadoone Medical Centre, Durban; Andreas Stavrides, Union Hospital, Alberton; Frederick Johannes Van Niekerk, Mediclinic Heart Hospital, Pretoria; Nadia Venter, Tiervlei Trial Centre, Cape Town; Shahid Wadvalla, Moosa N, Lenasia.

*Spain*: Josefina Olivares Alcolea, Hospital Son Llàtzer, Palma de Mallorca; Aránztzazu Álvarez de Arcaya Vicente, Hospital Universitario Clínico San Carlos, Madrid; Mª Beatriz Pérez Arroyo, Quirónsalud Madrid University Hospital, Madrid; Enrique Romero Bobillo, Hospital Clínico Universitario de Valladolid, Castilla y Leon; Mª Manuela Buño, Hospital de A Coruña, La Coruña; José N. Carreira Arias, Hospital de A Coruña, La Coruña; Miguel Camafort Babkowski, Hospital Clínic de Barcelona, Barcelona; Daniel Cepero García, Clinica San Pedro, Almería; Luis Masmiquel Comas, Hospital Son Llàtzer, Palma de Mallorca; María José Coves Figueras, Hospital Clínic de Barcelona, Barcelona; Carmen de la Cuesta Mayor, Nuevas Tecnologías en Diabetes y Endocrinología S.L, Sevilla; Mónica Domenech Feria-Carot, Hospital Clínic de Barcelona, Barcelona; Ana Mª Frade Fernández, Hospital de A Coruña, La Coruña; Manuel Ferreiro Gómez, Hospital de A Coruña, La Coruña; Clara García García, Nuevas Tecnologías en Diabetes y Endocrinología S.L, Sevilla; Emilio García Delgado, Hospital Universitario de Móstoles, Móstoles; Santiago Durán García, University Hospital Nuestra Señora de Valme, Sevilla; Luis A. Gómez Gómez, Hospital Son Llàtzer, Palma de Mallorca; Alfonso Soto González, Hospital de A Coruña, La Coruña; Cristina Hernán García, Hospital Clínico Universitario de Valladolid, Castilla y Leon Valladolid; Mª Ángeles Tapia Herrero, Hospital Universitario de Móstoles, Móstoles; Esteban Jodar Gimeno, Quirónsalud Madrid University Hospital, Madrid; Julia Quevedo Juanals, Hospital Son Llàtzer, Palma de Mallorca; Manuel López Jiménez, Hospital Universitario de Móstoles, Móstoles; Ferrán Masanes , Hospital Clínic de Barcelona, Barcelona; Ángel L. Marco Mur, Hospital Universitario de Móstoles, Móstoles; Margarita Navarro López, Hospital Clínic de Barcelona, Barcelona; Joana Nicolau Ramis, Hospital Son Llàtzer, Palma de Mallorca; Apolonia Gil Palmer, Hospital Son Llàtzer, Islas Baleares; Alfonso Calle Pascual, Hospital Universitario Clínico San Carlos, Madrid; Laura G. Romero Pérez, Hospital Universitario Clínico San Carlos, Madrid; Cristobal Morales Portillo, Nuevas Tecnologías en Diabetes y Endocrinología S.L, Sevilla; Sergio Prieto González, Hospital Clínic de Barcelona, Barcelona; Pedro Mezquita Raya, Clinica San Pedro, Almería; Rebeca Reyes García, Clinica San Pedro, Almería; Tomás Ripoll Vera, Hospital Son Llàtzer, Palma de Mallorca; Carmen Rodríguez Castro, Hospital Universitario de Móstoles, Móstoles; Irene Rodríguez Rodríguez, Hospital Son Llàtzer, Palma de Mallorca; Emilio Sacanella Meseguer, Hospital Clínic de Barcelona, Barcelona; Isabel Serrano Olmedo, Nuevas Tecnologías en Diabetes y Endocrinología S.L, Sevilla; Alfonso Lopez Soto, Hospital Clínic de Barcelona, Barcelona; Fernando Toba Alonso, Hospital de A Coruña, 22 La Coruña; Alberto Aliaga Verdugo, Nuevas Tecnologías en Diabetes y Endocrinología S.L, Sevilla; Josep Vidal Cortada, Hospital Clínic de Barcelona, Barcelona; Luis Vigil Medina, Hospital Universitario de Móstoles, Móstoles.

*Sweden*: Eva Ackefelt-Frick, Universitetssjukhuset Örebro, Örebro; Helena Alfredsson, Karolinska Trial Alliance, Stockholm; Erik Beling, Karolinska Trial Alliance, Stockholm; Peter Benedek, Karolinska Universitetssjukhuset, Stockholm; Milita Crisby, Karolinska Trial Alliance, Stockholm; Mozgan Dorkhan, Endokrinologiska kliniken, Malmo; Tomasz Drescik, Universitetssjukhuset Örebro, Örebro; Katarina Eeg-Olofsson, Lundberglaboratoriet för diabetesforskning, Sahlgrenska Universitetssjukhuset, Göteborg; Björn Eliasson, Lundberglaboratoriet för diabetesforskning, Sahlgrenska Universitetssjukhuset, Göteborg; Ken Eliasson, Universitetssjukhuset Örebro, Örebro; Mats Eriksson, Karolinska Universitetssjukhuset, Stockholm; Peter Fardelin, Universitetssjukhuset Örebro, Örebro; Anna Fredholm, Karolinska Trial Alliance, Stockholm; Anders Frid, Endokrinologiska kliniken, Malmo; Kurt Gerok-Andersson, Karolinska Universitetssjukhuset, Stockholm; Lars Hjelmaeus, Citydiabetes, Stockholm; Andreas Hufnagl, Karolinska Trial Alliance, Stockholm; Ewa Jasinska, Universitetssjukhuset Örebro, Örebro; Ewa Kowalska, Universitetssjukhuset Örebro, Örebro; Pierre Lafolie, Karolinska Trial Alliance, Stockholm; Otto Lindquist, Karolinska Trial Alliance, Stockholm; Martin Lundvall, Universitetssjukhuset Örebro, Örebro; Eva Melander, Universitetssjukhuset Örebro, Örebro; Camilla Nicander, Universitetssjukhuset Örebro, Örebro; Linda Moris, Karolinska Trial Alliance, Stockholm; Bengt-Olov Tengmark, Citydiabetes, Stockholm; Martin Ridderstråle, Endokrinologiska kliniken, Malmo; Ulrika Saphir, Karolinska Trial Alliance, Stockholm; Pia Skagerberg, Karolinska Trial Alliance, Stockholm; Christian Steczkó-Nilsson, Universitetssjukhuset Örebro, Örebro; Björn Strandell, Universitetssjukhuset Örebro, Örebro; Ylva Tomson, Karolinska Trial Alliance, Stockholm.

*Taiwan*: Jeng-Yeou Chen, Chung Gung Medical Foundation-Linkou Branch 5, Gueishan, Taoyuan; Yu-Cheng Chen, Changhua Christian Hospital, Changhua; Chun-Yen Chiang, Chi Mei Medical Center, Tainan Tsuei-Yuan Huang, Chi Mei Medical Center, Tainan; Chien-Wen Chou, Chi Mei Medical Center, Tainan; Chun-Wei Ho, Kaohsiung Medical University Hospital, Kaohsiung; Pi-Jung Hsiao, Kaohsiung Medical University Hospital, Kaohsiung; Ming-Chia Hsieh, Changhua Christian Hospital, Changhua; Ray-Sea Hsu, Chung Gung Medical Foundation-Linkou Branch 5, Gueishan, Taoyuan; Shang Ren Hsu, Changhua Christian Hospital, Changhua; Chung-Huei Huang, Chung Gung Medical Foundation-Linkou Branch 5, Gueishan, Taoyuan; Yu-Yao Huang, Chung Gung Medical Foundation-Linkou Branch 5, Gueishan, Taoyuan; Wei-Wen Hung, Kaohsiung Medical University Hospital, Kaohsiung; Mei-Yueh Lee, Kaohsiung Medical University Hospital, Kaohsiung; Yang-Ming Lee, Changhua Christian Hospital, Changhua; Chen-Wei Lin, Chung Gung Medical Foundation-Linkou Branch 5, Gueishan, Taoyuan; Chia-Hung Lin, Chung Gung Medical Foundation-Linkou Branch 5, Gueishan, Taoyuan; Kun-Der Lin, Kaohsiung Medical University Hospital, Kaohsiung; Shi-Dou Lin, Changhua Christian Hospital, Changhua; Shu-Fu Lin, Chung Gung Medical Foundation-Linkou Branch 5, Gueishan, Taoyuan; Miaw-Jene Liou, Chung Gung Medical Foundation-Linkou Branch 5, Gueishan, Taoyuan; Wen-Tsung Lu, Chung Gung Medical Foundation-Linkou Branch 5, Gueishan, Taoyuan; Shyi-Jang Shin, Kaohsiung Medical University Hospital, Kaohsiung; Hon-Ke Sia, Changhua Christian Hospital, Changhua; Mu-Hsuan Su, Kaohsiung Medical University Hospital, Kaohsiung; Shih-Li Su, Changhua Christian Hospital, Changhua; Jui-Hung Sun, Chung Gung Medical FoundationLinkou Branch 5, Gueishan, Taoyuan; Kai-Jen Tien, Chi Mei Medical Center, Tainan; Dong Hwa Tsai, Changhua Christian Hospital, Changhua; Sung-Sheng Tsai, Chung Gung Medical Foundation-Linkou Branch 5, Gueishan, Taoyuan; Shih-Te Tu, Changhua Christian Hospital, Changhua; Chih-Ching Wang, Chung Gung Medical Foundation-Linkou Branch 5, Gueishan, Taoyuan; Shu Yi Wang, Changhua Christian Hospital, Changhua; Chwen-Yi Yang, Chi Mei Medical Center, Tainan; Feng Chieh Yen, Chi Mei Medical Center, Tainan.

*Turkey*: Abdurrahman Acikgoz, Haseki Training and Research Hospital, Istanbul; Sema Akalin, Marmara University Medical Faculty, Istanbul; Safak Akin, Hacettepe University Medical School, Ankara; Baris Akinci, Dokuz Eylul University Medical Faculty, Izmir; Aysen Akkurt, School of Medicine, Uludag University, Bursa; Mujde Akturk, Gazi University Faculty of Medicine, Ankara; Nihan Alkis, School of Medicine, Uludag University, Bursa; Ilker Altun, Ege University Medical School, Izmir; Hasan Ali Altunbas, Akdeniz University Medical Faculty, Antalya; Yuksel Altuntas, Sisli Etfal Training and Research Hospital, Istanbul; Mustafa Araz, Gaziantep University Medical Faculty, Gaziantep; Sulbiye Aribas, Erciyes University Medical Faculty, Kayseri; Emre Arslan, Gazi University Faculty of Medicine, Ankara; Gulgun Arslan, Dr. Lutfi Kırdar Kartal Training and Research Hospital, Istanbul; Metin Arslan, Gazi University Faculty of Medicine, Ankara; Esra Hayriye Ataoglu, Haseki Training and Research Hospital, Istanbul; Faruk Ayan, Cerrahpasa Medical School, Istanbul University, Istanbul; Kadriye Aydin, Hacettepe University School of Medicine, Ankara; Berna Imge Aydogan, Ankara University School of Medicine, Ankara; Goksun Ayvaz, Gazi University Faculty of Medicine, Ankara; Muzeyyen Arslan Bahadir, Goztepe Training and Research Hospital, Istanbul Medeniyet University, Istanbul; Mustafa Kemal Balci, Akdeniz University Medical Faculty, Antalya; Mehtap Navdar Basaran, Ankara Numune Training and Research Hospital, Ankara; Nilgun Baskal, Ankara University School of Medicine, Ankara; Melike Zehra Bugra, Istanbul Faculty of Medicine, Istanbul University, Istanbul; Mehmet Calan, Dokuz Eylul University Medical Faculty, İzmir; Umit Cavdar, Dokuz Eylul University Medical Faculty, İzmir; Faik Cetin, Haseki Training and Research Hospital, Istanbul; Nese Cinar, Hacettepe University School of Medicine, Ankara; Mehmet Colbay, Gazi University Faculty of Medicine, Ankara; Abdurrahman Comlekci, Dokuz Eylul University Medical Faculty, İzmir; Selcuk Dagdelen, Hacettepe University School of Medicine, Ankara; Taner Damci, Cerrahpasa Medical School, Istanbul University, Istanbul; Vedat Davutoglu, Gaziantep University Medical Faculty, Gaziantep; Mustafa Demir, Dr. Lutfi Kırdar Kartal Training and Research Hospital, Istanbul; Tevfik Demir, Dokuz Eylul University Medical Faculty, İzmir; Oguzhan Deyneli, Marmara University Medical Faculty, Istanbul; Irem Dincer, Ankara University School of Medicine, Ankara; Burcu Dogan, Goztepe Training and Research Hospital, Istanbul Medeniyet University, Istanbul; Kadriye Yesim Kanipek Doker, Haseki Training and Research Hospital, Istanbul; Ismail Engin, Haseki Training and Research Hospital, Istanbul; Ayten Eraydin, Gaziantep University Medical Faculty, Gaziantep; Tomris Erbas, Hacettepe University School of Medicine, Ankara; Murat Faik Erdogan, Ankara University School of Medicine, Ankara; Canan Ersoy, School of Medicine, Uludag University, Bursa; Arzu Gedik, Dokuz Eylul University Medical Faculty, İzmir; Ferhat Gokay, Ankara Numune Training and Research Hospital, Ankara; Ozen Oz Gul, School of Medicine, Uludag University, Bursa; Serdar Guler, Ankara Numune Training and Research Hospital, Ankara; Tugba Gumus, Dokuz Eylul University Medical Faculty, Izmir; Elif Gunes, School of Medicine, Uludag University, Bursa; Mehmet Yavuz Gurler, Sisli Etfal Training and Research Hospital, Istanbul; Esra Hatipoglu, Cerrahpasa Medical School, Istanbul University, Istanbul; Hasan Ilkova, Florence Nightingale Hospital, Istanbul; Ozlem Turhan Iyidir, Gazi University Faculty of Medicine, Ankara; Giray Kabakci, Hacettepe University Medical School, Ankara; Berrin Karadag, Sisli Etfal Training and Research Hospital, Istanbul; Guzin Karatemiz, Sisli Etfal Training and Research Hospital, Istanbul; Alper Cagri Karci, Ankara Numune Training and Research Hospital, Ankara; Emine Kartal, Ege University Medical School, Izmir; Ergun Baris Kaya, Hacettepe University Medical School, Ankara; Caglar Keskin, Ankara University School of Medicine, Ankara; Ela Fatma Keskin, Cerrahpasa Medical School, Istanbul University, Istanbul; Gokcen Kocabas, Ege University Medical School, Izmir; Feride Kocak, Goztepe Training and Research Hospital, Istanbul Medeniyet University, Istanbul; Aylin Kamut Kol, Sisli Etfal Training and Research Hospital, Istanbul; Hakan Korkmaz, Gaziantep University Faculty of Medicine, Gaziantep; Ferit Kerim Kucukler, Ankara Numune Training and Research Hospital, Ankara; Banu Alpaslan Mesci, Goztepe Training and Research Hospital, Istanbul Medeniyet University, Istanbul; Aytekin Oguz, Istanbul Medeniyet University, Goztepe Training and Research Hospital, Istanbul; Ekrem Orbay, Dr. Lutfi Kırdar Kartal Training and Research Hospital, Istanbul; Hasan Oz, Dr. Lutfi Kırdar Kartal Training and Research Hospital, Istanbul; Nazan Demir Ozcan, Sisli Etfal Training and Research Hospital, Istanbul; Sadi Ozdem, Akdeniz University Medical Faculty, Antalya; Secil Ozisik, Dokuz Eylul University Medical Faculty, Izmir; Cigdem Ozkan, Gazi University Faculty of Medicine, Ankara; Muge Ozsan, Gaziantep University Medical Faculty, Gaziantep; Mucahit Ozyazar, Cerrahpasa Medical School, Istanbul University, Istanbul; Hayri Parlar, Florence Nightingale Hospital, Istanbul; Haluk Sargin, Dr. Lutfi Kırdar Kartal Training and Research Hospital, Istanbul; Mehmet Sargin, Dr. Lutfi Kırdar Kartal Training and Research Hospital, Istanbul; Ilhan Satman, Istanbul Faculty of Medicine, Istanbul University, Istanbul; Fusun Saygili, Ege University Medical School, Izmir; Alev Selek, Marmara University Faculty of Medicine, Istanbul; Yasin Simsek, Erciyes University Medical Faculty, Kayseri; Pinar Sisman, School of Medicine, Uludag University, Bursa; Kubra Solmaz, Haseki Training and Research Hospital, Istanbul; Cahide Soydas, Ege University Medical School, Izmir; Serkan Tatliagac, Florence Nightingale Hospital, Istanbul; Ismet Tamer, Dr. Lutfi Kırdar Kartal Training and Research Hospital, Istanbul; Sule Temizkan, Marmara University Medical Faculty, Istanbul; Cansin Tulunay, Ankara University School of Medicine, Ankara; Ercan Tuncel, School of Medicine, Uludag University, Bursa; Fulya Turker, Istanbul Faculty of Medicine, Istanbul University, Istanbul; Kursat Unluhizarci, Erciyes University Medical Faculty, Kayseri; Ugur Unluturk, Ankara University School of Medicine, Ankara; Meliha Melin Uygur, Marmara University Medical Faculty, Istanbul; Buket Vatansever, Dr. Lutfi Kırdar Kartal Training and Research Hospital, Istanbul; Dilek Yazici, Marmara University Medical Faculty, Istanbul; Dilek Gogas Yavuz, School of Medicine, Marmara University, Istanbul; Serkan Yener, Dokuz Eylul University Medical Faculty, İzmir; Mustafa Yenigun, Haseki Training and Research Hospital, Istanbul; Merve Yilmaz, Dokuz Eylul University Medical Faculty, İzmir.

*United Arab Emirates*: Saira Abbas, Diabetology Unit, Rashid Hospital, Dubai; Fatheya Alawadi, Dubai Hospital, Dubai; Azza Abdul Aziz, Dubai Hospital, Dubai; Alaaeldin Bashier, Dubai Hospital, Dubai; Khadija Hafidh, Rashid Hospital, Dubai; Ghaida Kaddaha, Rashid Hospital, Dubai; Fauzia Rashid, Dubai Hospital, Dubai.

*United Kingdom*: Prakash Abraham, Aberdeen Royal Infirmary, Aberdeen; Karen Adamson, St John’s Hospital, Livingston; Steve Atkin, Michael White Centre for Diabetes & Endocrinology, Hull Royal Infirmary, Hull; Myint Aye, Michael White Centre for Diabetes & Endocrinology, Hull Royal Infirmary, Hull; Mohammad Azam, Diabetes Centre, Birmingham Heartlands Hospital, Birmingham; S Bain, Clinical Trials Unit, Morriston Hospital, Morriston; AH Barnett, Diabetes Centre, Birmingham Heartlands Hospital, Birmingham; Srikanth Bellary, Diabetes Centre, Birmingham Heartlands Hospital, Birmingham; Ketan Dhatariya, University of East Anglia, Norwich; Mike Eaton, Diabetes Clinical Research Unit, Plymouth Science Park, Plymouth; Patrick English, Derriford Hospital, Plymouth; Jane Ewing, University of East Anglia, Norwich; Niall Furlong, Diabetes & Endocrinology Centre, Whiston Hospital, Preston; Martin Gibson, Clinical Science Building, Salford Royal Hospital Foundation Trust, Salford; Darren Green, Salford Royal NHS Foundation Trust, Salford; Roselle Herring, Cedar Centre, Royal Surrey County Hospital, Guildford; Victoria Hordern, The Royal Surrey County Hospital, Guildford; Alan Jaap, Royal Infirmary of Edinburgh, Edinburgh; Zeesham Javed, Michael White Centre for Diabetes & Endocrinology, Hull Royal Infirmary, Hull; Andrew Johnson, Southmead Hospital, Westbury on Trym; Judit Konya, Michael White Centre for Diabetes & Endocrinology, Hull Royal Infirmary, Hull; Sudesh Kumar, Diabetes and Metabolism Unit, Coventry & Warwick Hospital, Coventry; Robert Lindsay, BHF Glasgow Cardiovascular Research Centre, University of Glasgow, Glasgow; Alasdair Mackie, Diabetes Support Unit, Ninewells Hospital, Dundee; Stephen McGlynn, Salford Royal Hospital Foundation Trust, Salford; Joyce McKenzie, Diabetes Centre, The New Stobhill Hospital, Glasgow; Ann Millward, Derriford Hospital, Plymouth; N. Murthy, Warwickshire Institute for Diabetes, Endocrinology and Metabolism Centre, University Hospital Coventry & Warwickshire NHS Trust, Coventry; Richard Paisey, Torbay Hospital, Torquay; Ewan Pearson, Ninewells Hopital and Medical School, Dundee; Milan Piya, University Hospitals Coventry and Warwickshire NHS Trust, Coventry; Mike Ramell, Royal Devon & Exeter Hospital, Exeter; Doug Robertson, Diabetes Centre, Sandwell General Hospital, West Bromwich; David Russell-Jones, The Cedar Centre, Royal Surrey County Hospital, Guildford; Ponnusamy Saravanan, Diabetes and Endocrinology Centre, George Eliot Hospital NHS Trust, Nuneaton; Thozhukat Sathyapalan, Michael White Centre for Diabetes & Endocrinology, Hull Royal Infirmary, Hull; Jayadave Shakher, Diabetes Centre, Birmingham Heartlands Hospital, Birmingham; Hannah Shiels, Torbay Hospital, Torquay; Subash Sivaraman, University Hospitals Coventry and Warwickshire NHS Trust, Coventry; Jamie Smith, Torbay Hospital, Torquay; Upendram Srinivas-Shankar, Diabetes Centre, St. Helens Hospital, Merseyside; J Stokes, Derriford Hospital, Plymouth; Inessa Tracey, Diabetes Centre, Sandwell General Hospital, West Bromwich; Bijay Vaidya, Royal Devon & Exeter Hospital, Wonford; Michael Yee, Metabolic Medicine, St Mary's Hospital, London; Prasad Yemparala, Diabetes Centre, Birmingham Heartlands Hospital, Birmingham; James Walker, St John's Hospital, Livingston; Peter Wiggins, Castlemilk Health Centre, Glasgow; Jane Williams, Diabetes Centre, Hospital of St Cross, Rugby; John Wright, Cedar Centre, Royal Surrey County Hospital, Guildford; Carol Mackinnon, Castlemilk Group Practice, Glasgow; Janet Inkster, Aberdeen Royal Infirmary, Aberdeen; Javeed Zeeshan, Michael White Centre for Diabetes and Endocrinology, Hull Royal Infirmary, Hull; Christina Bejnariu, Michael White Centre for Diabetes and Endocrinology, Hull Royal Infirmary, Hull; Nagaraj Malipatil, Salford Royal NHS Foundation Trust, Salford; Sumithra Giritharan, Salford Royal NHS Foundation Trust, Salford; Kathryn Lonnen, Southmead Hospital, Bristol; Ioannis Kyrou, Diabetes and Metabolism Unit, Coventry & Warwick Hospital, Coventry.

*United States of America*: Sayed Aamir, University Specialty Clinics, Columbia; Michelle Ababa, Anaheim Clinical Trials, Anaheim; Marconi Abreu, UT Southwestern Medical Center, Dallas; Derick Adams, Lexington VA Medical Center, Lexington; Penny Adams, Station Medical Center, Altoona; Joy Aden, Northeast Clinical Research Center, Bethlehem; Diana Aguilar, Catalina Research Institute, Chino; Ana Aguillon, Facey Medical Group, Mission Hills; Afiya Ahmed, Apex Medical Research Inc, Chicago; Azazuddin Ahmed, Apex Medical Research Inc, Chicago; Bilal Ahmed, Central Florida Medical Associates, Orange City; Intekhab Ahmed, Thomas Jefferson University Hospitals, Philadelphia; Atif Akhtar, Northwest Heart Center, Tomball; Bruce Akright, Northeast Clinical Research Center, Bethlehem; Laura Akright, Northeast Clinical Research Center, Bethlehem; Cesar Albarracin, Corpus Christi Memorial Hospital, Corpus Christi; Sara Albert, FPA Clinical Research, Kissimmee; Shamasa Ali, Tulane University School of Medicine, New Orleans; Bushra Aliuddin, Apex Medical Research Inc, Chicago; Afrah Almasmary, Alzohaili Medical Consultants, Dearborn; Abdulmalek Al-Maweri, Alzohaili Medical Consultants, Dearborn; Opada Alzohaili, Medical Consultants, Dearborn; William Amador, University Specialty Clinics, Columbia; Maged Amine, Northwest Heart Center, Tomball; Sami Amini, Narbonne Medical, Lomite; Marshall Anderson, Kernodle Clinic Inc, Burlington; Linda Anderson, The Christ Hospital Lindner Research Center, Cincinnati; Robert Anderson, Veterans Affairs Medical Center, Omaha; Maria Andrews, Covenant Clinical Research, San Antonio; Jose Angel, Iowa Diabetes & Endocrinology Center, Des Moines; Wissam Anteer, Alzohaili Medical Consultants, Dearborn; Vincent Anthony, American Institute of Research, Los Angeles; Arturo Antillon, American Institute of Research, Los Angeles; Penny Anzures, Veterans Affairs Medical Center, Omaha; Sirlys Arcon-Rios, OUHSC: Diabetes and Endocrinology, Oklahoma City; David Arkin, Physicians Research Associates LLC, Lawrenceville; Bassam Arodak, OUHSC: Diabetes and Endocrinology, Oklahoma City; Louis Aronne, Comprehensive Weight Control Center, New York; Stephen Aronoff, Research Institute of Dallas, Dallas; Guadalupe Arreola, Facey Medical Group, Mission Hills; Sonia Arroyo, 400 North Medical Center, Michigan City; Sunil Asnani, Jersey Shore University Medical Center, Neptune; Gwendolyn Astudillo-Tee, Dignity Health - Chandler Regional Medical Center, Chandler; Susan Ault, Awasty Research Network, Marion; Barry Austin, Preferred Primary Care Physicians, Pittsburgh; Veronica Avila, Orange County Senior Care Clinical Trials, Tustin; Nicholas Avitabile, Tulane University School of Medicine, New Orleans; Vivek Awasty, Awasty Research Network, Marion; Vivek Awasty, OhioHealth Marion Area Physicians, Marion; Madona Azar, University of Oklahoma College of Medicine Internal Medicine, Oklahoma City; Ammara Aziz, OUHSC: Diabetes and Endocrinology, Oklahoma City; Pouya Bahrami, American Institute of Research, Los Angeles; Mirza Baig, Paramount Medical Research & Consulting, Cleveland; Kimberly Bailey, Christ Hospital Lindner Research Center, Cincinnati; Timothy Bailey, AMCR Institute Inc, Escondido; Mary Baker, University Of Oklahoma College Of Medicine, Oklahoma City; Narinder S. Bala, Bala and Khaira Medical Center, Fresno; Idelisse Balbes-Reyes, Eastern Consulting Group Inc, Humacao; David Baldwin, Rush University Medical Center, Chicago; Elisa Baldwin, Awasty Research Network, Marion; Tracy Balentine, Meridien Research, Tampa; Thomas Ballard, Mountain View Clinical Research, Greer; Kemal Baloch, Northwest Houston Cardiology, Houston; Salomon Banarer, Dallas Diabetes & Endocrine Center, Dallas; Cheryl Baney, Blair Medical Associates Inc, Station Medical Center, Altoona; Ajaz Banka, Tulane University School of Medicine, New Orleans; Linda Barber, Lexington VA Medical Center, Lexington; Mark Barber, Professional Clinical Research, Interlochen; Timothy Barker, Research Institute of the Carolinas, Mooresville; Kristie Barnes, Physicians East Endocrinology, Greenville; Otis Barnum, Natchitoches Medical Specialists, Natchitoches; Joel Barra, American Institute of Research, Los Angeles; Anthony Bartkowiak, Blair Medical Associates Inc, Altoona; Giovanni Baula, Westcoast Primary Care, St. Petersburg; Angela Bautista, AMCR Institute Inc, Escondido; Robert Bayliss, Internal Medicine Associates of Greenville, Greenville; Melissa Beaman, Facey Medical Group, Mission Hills; Karen Beatty, University of Louisville Physicians, Louisville; Judith Becker, Paramount Medical Research & Consulting, Cleveland; Laura Bedolla, AMCR Institute Inc, Escondido; Gulshan Begum, Medex Healthcare Research Inc., New York; Paula Belejchak, Preferred Primary Care Physicians, Pittsburgh; Amy Bell, University of Tennessee Health Science Center, Memphis; Magali Beltran, Radiant Research Inc, Chicago; Christine Belucher, Blair Medical Associates Inc, Altoona; Erin Bensfield, Orange County Senior Care Clinic Tustin; Julia Benton, Blair Medical Associates Inc, Altoona; Katherine Bergamo, UNC Diabetes Care Center, Chapel Hill; Richard Bergenstal, International Diabetes Center, Minneapolis; Bradford Bergman, Benefis Medical Group, Great Falls; Martha Berry, Arthritis & Diabetes Clinic, Monroe; Kirsten Bettino, Narbonne Medical, Lomita; Matthew Beyea, Clinical Study Center of Asheville, Asheville; Anuj Bhargava, Iowa Diabetes & Endocrinology Center, Des Moines; Arjun Bhattacharya, Medex HealthCare Research, St. Louis; Alistaire Bilas, Anaheim Clinical Trials, Anaheim; Lindsay Bischoff, Thomas Jefferson University Hospitals, Philadelphia; Lacey Bixler, OUHSC: Diabetes and Endocrinology, Oklahoma City; Susan Bizjack, Paramount Medical Research & Consulting, Cleveland; Roy Blank, Novant Health Southern Peidmont, Monroe; Robert Blankfield, Paramount Medical Research & Consulting, Cleveland; Louba Block, Thomas Jefferson University Hospitals, Philadelphia; James Bloodworth, Internal Medicine Associates of Greenville, Ann Arbor; Kerri Bloomberg, Dignity Health - Chandler Regional Medical Center, Chandler; Robert Bloomberg, Dignity Health - Chandler Regional Medical Center, Chandler; Joy Blustin, Facey Medical Group, Mission Hills; Ivica Boban, Thomas Jefferson University Hospitals, Philadelphia; Alicia Bolden, Maxine Hamilton PA, Fort Lauderdale; Otilia Boncu, Midwest Endocrinology, Crystal Lake; Patricia Bookless, Southern New Hampshire Diabetes and Endocrinology, Nashua; Christina Brassie, Internist Associates of Central New York Crouse Medical Practice, Manlius; Donald Brautigam, Great Lakes Medical Research, Westfield; Peter Bressler, North Texas Endocrine Center, Dallas; Rose Brewster, Innovative Research of West Florida, Clearwater; Christina Brown, Heritage Valley Medical Group, Beaver; Cynthia Brown, Southeastern Endocrine & Diabetes, Roswell; Debra Brown, Endocrine and Psychiatry Center, Houston; Flossine Brown, Union Memorial Hospital, Baltimore; Mary Bruskewitz, University of Wisconsin School of Medicine and Public Health, Madison; Dawn Bryant, Endocrine and Psychiatry Center, Houston; Cyndi Buchanan, Medex HealthCare Research, St. Louis; Nicole Buchanan, Blair Medical Associates Inc, Altoona; Genena Buck, Physicians East Endocrinology, Greenville; Sharon Buckley, OUHSC: Diabetes and Endocrinology, Oklahoma City; Jacqueline Bueno, Midwest Endocrinology, Crystal Lake; Deborah Burke, Innovative Research of West Florida, Clearwater; Kathryn Burton, Cincinnati VA Medical Center, Cincinnati; John Buse, UNC Diabetes Care Center, Chapel Hill; Sherry Buske, Iowa Diabetes & Endocrinology Center, Des Moines; William Byars, Mountain View Clinical Research, Greer; Robin Bye, Tulane University School of Medicine, New Orleans; Ronald Caldwell, Clinical Study Center of Asheville, Asheville; Krystle Calvin, 400 North Medical Center, Michigan City; Rolando Camacho, Monterey Bay Family Physicians, Watsonville; Edward Campbell, Research Institute of the Carolinas, Mooresville; Daniel Cannon, Clinical Study Center of Asheville, Asheville; Janette Cantrell, Tampa Clinical Research, Tampa; Jonathan Caplan, Florida Diabetes/Endocrine Center, Orlando; Carlos Cardenas, Northeast Clinical Research Center, Bethlehem; Jamie Carlton, Alzohaili Medical Consultants, Dearborn; Gandahari Carpio, Tulane University School of Medicine, New Orleans; Anne Carrol, Paramount Medical Research & Consulting, Cleveland; Laurie Cartwright, Orange County Senior Care Clinic, Tustin; Gerardo Casanova, Apex Medical Research Inc, Chicago; Lorena Castaneda, Martin Diagnostic Clinic, Tomball; Martha Castle, Internist Associates of Central New York Crouse Medical Practice, Manlius; LouAnn Castro, Northeast Clinical Research Center, Bethlehem; Jennifer Catangay, Linda Vista Health Care Center, San Diego; Sushela Chaidarun, Dartmouth-Hitchcock Medical Center, Lebanon; Joseph Chambers, Facey Medical Group, Mission Hills; Thomas Chambliss, Internal Medicine Associates of Greenville, Ann Arbor; Lokesh Chandra, Apex Medical Research Inc, Chicago; Alvin Chang, Orange County Senior Care Clinic, Tustin; Simon Chang, Orange County Senior Care Clinic, Tustin; Jordan Chappel, FPA Clinical Research, Kissimmee; Christopher Chappel, FPA Clinical Research, Kissimmee; Tierra Chappell, Maxine Hamilton PA, Fort Lauderdale; Carmina Charles, Medical University of South Carolina, Charleston; Alberto Chavira, AMCR Institute Inc, Escondido; Louis Chaykin, Meridien Research, St. Petersburg; Ellen Check, Louis Stokes Cleveland VA Medical Center, Cleveland; Lambert Chee, Diablo Clinical Research, Walnut Creek; Junping Chen, University of Oklahoma College of Medicine, Oklahoma City; Amanda Cherry, Physicians East, Greenville, NC; Aaron Chestnut, University Specialty Clinics, Columbia; June Chiarot, Great Lakes Medical Research, Westfield; Niyati Chiniwala, Thomas Jefferson University Hospitals, Philadelphia; Kristen Chionh, Baylor Research Institute, Dallas, TX; James Choe, OUHSC: Diabetes and Endocrinology, Oklahoma City; Mark Christiansen, Diablo Clinical Research, Walnut Creek; Steven Chrzanowski, Benefis Med Spa, Great Falls; Ellie Chuang, Southern New Hampshire Diabetes and Endocrinology, Nashua; Leonard Chuck, Diablo Clinical Research, Walnut Creek; Julie Clyatt, Florida Diabetes/Endocrine Center, Orlando; Barry Cohan, Great Falls Clinic, Great Falls; Barry Cohan, Benefis Med Spa, Great Falls; Robert Cohen, University of Cincinnati College of Medicine, Cincinnati; Richard Comi, Dartmouth-Hitchcock Medical Center, Lebanon; Angel Comulada-Rivera, Instituto De Endocrinologia Diabetes, Levittown; Kathi Conner, Harrison Community Hospital, Cadiz; Gordon Connor, Radiant Research Inc, Birmingham; Rosa Contreras, Anaheim Clinical Trials, Anaheim; Karen Cook, Physicians Research Associates LLC, Lawrenceville; Robin Cook, Novant Health Southern Piedmont, Monroe; Richard Cook, Preferred Primary Care Physicians, Uniontown; Clinton Corder, COR Clinical Research, Oklahoma City; Brenda Cornejo Sr., Catalina Research Institute, Chino; Lisa Cornette, Southern New Hampshire Diabetes and Endocrinology, Nashua; Guadelupe Cortes, Facey Medical Group, Mission Hills; Lenore Cortez, Southern New Hampshire Diabetes and Endocrinology, Nashua; Carole Cox, Crescent City Clinical Research, Metairie; Gabriela Cox, Louis Stokes Cleveland VA Medical Center, Cleveland; William Craig, Internal Medicine Associates of Greenville, Ann Arbor; Bethany Cramer, Louis Stokes Cleveland VA Medical Center, Cleveland; Carol Cromer, Tampa Clinical Research, Tampa; Michael Cromer, Tampa Clinical Research, Tampa; Robert Cuddihy, International Diabetes Center, Minneapolis; Dawn Culmer, UNC Diabetes Care Center, Chapel Hill; Dawn Culmer, UNC Diabetes Care Center, Chapel Hill; Hope Curran, Radiant Research Inc, Chicago; Miriam Curran, Suncoast Medical Center, St. Petersburg; Catherine Dadis, Benefis Med Spa, Great Falls; Samuel Dagogo-Jack, University of Tennessee Health Science Center, Memphis; Ismail Dairywala, Northwest Heart Center, Tomball; David D'Alessio, University of Cincinnati College of Medicine, Cincinnati; Gregory Damberg, International Diabetes Center, Minneapolis; Andy Dang, Facey Medical Group, Mission Hills; Karen Daniel, Endocrine and Psychiatry Center, Houston; Michael Davidson, Radiant Research Inc, Chicago; Trent Davis, AMCR Institute Inc, Escondido; John Dean, Clinical Study Center of Asheville, Asheville; Rowan DeBold, International Diabetes Center, Minneapolis; Peggy Deitz, Clinical Study Center of Asheville, Asheville; Maria Del, Pilar Solano Diabetes Research Institute University of Miami, Miami; David Delaney, Great Falls Clinic, Great Falls; Elizabeth Delgado, Anaheim Clinical Trials, Anaheim; Michael DeMicco, Anaheim Clinical Trials, Anaheim; Mary Ann DeMuro, University of Louisville Hospital, Louisville; Dina DeSalle, Heritage Valley Medical Group, Beaver; Cyrus Desouza, Veterans Affairs Medical Center, Omaha; Karthikeya Devireddy, KD Medical Group Inc, Columbia; Benjamin DeVries, Innovative Research of West Florida, Clearwater; Milana Dezube, UNC Diabetes Care Center, Chapel Hill; Isam Diab, Paramount Medical Research & Consulting, Cleveland; Amy Diesburg-Stanwood, Denver VA Medical Center, Denver; Julia Dilliard, North Texas Endocrine Center, Dallas; Jessica Dilling, Blair Medical Associates Inc, Altoona; Jaime Diner, UNC Diabetes Care Center, Chapel Hill; Katherine Dishongh, John L. McClellan Memorial Veterans Hospital, Little Rock; Regina Dodis, Norwalk Medical Group, Norwalk; Christina Doing, Mercy Medical Research Institute, Springfield; Warren Doll, Union Memorial Hospital, Baltimore; Amanda Donoho, Holston Medical Group, Kingsport; Daniel Donovan, Mount Sinai Hospital, New York; Nathan Doremus, American Institute of Research, Los Angeles; Steven Dorfman, Research Institute Of Dallas, Dallas; Pinal Doshi, Pioneer Medical Group, Cerritos; Jean Dostou, UNC Diabetes Care Center, Chapel Hill; Jean Dostou, Highgate Specialty Center, Durham; Delaine Douglas, Grunberger Diabetes Institute, Bloomfield Hills; Sara Douglass, University of Colorado School of Medicine, Denver; Desiree Douglas, Meridien Research, St. Petersburg; Michelle Dowell, Meridien Research, St. Petersburg; Emily Drazich, Great Falls Clinic, Great Falls; Erika Driver, Radiant Research Inc, Chicago; Haiming Du, University of Tennessee Health Science Center, Memphis; Robert DuBose III, Internal Medicine Associates of Greenville Ann Arbor; Michelle Duclos, UNC Diabetes Care Center, Chapel Hill; Michelle Duclos, UNC Diabetes Care Center, Chapel Hill; Kelly Dunn, Tampa Clinical Research, Tampa; Terry Dunnam, Research Institute Of Dallas, Dallas; Nancy Durham, Mountain View Clinical Research, Greer; Lyndsey Dye, Lexington VA Medical Center, Lexington; Donald Eagerton, Carolina Health Specialists, Myrtle Beach; Sotonte Ebenibo, University of Tennessee Health Science Center, Memphis; Chimaroke Edeoga, University of Tennessee Health Science Center, Memphis; Gina Edwards, Panacea Clinical Research, San Antonio; James Ekwensi, University of Tennessee Health Science Center, Memphis; Imad El Asmar, American Institute of Research, Los Angeles; Nabil El Sayad, Narbonne Medical, Lomita; Christopher Eliopoulos, UK HealthCare Kentucky Clinic, Lexington; Myriam Elkosseifi, OUHSC: Diabetes and Endocrinology, Oklahoma City; Ryanne Elmer, OUHSC: Diabetes and Endocrinology, Oklahoma City; Miles Elmore, Clinical Study Center of Asheville, Asheville; Diane Elson, University of Wisconsin School of Medicine and Public Health, Madison; Louna El-Zein, University Specialty Clinics, Columbia; Laurie Emmert, Meridien Research, St. Petersburg; Lee Erbe, Medical University of South Carolina, Charleston; Susie Estes, Endocrine and Psychiatry Center, Houston; Lorie Estrada, Baylor Research Institute, Dallas, TX; Aristides Estrada, Internal Medicine of Morris County, Dover; Tricia Eveleigh, Crouse Medical Practice, Syracuse; Brian Everhart, Heritage Valley Medical Group, Beaver; Fred Faas, John L. McClellan Memorial Veterans Hospital, Little Rock; Carri Faircloth, Research Institute of the Carolinas, Mooresville; Mildred Farmer, Meridien Research, Brooksville; Karen Fehr, Suncoast Medical Center, St. Petersburg; Tanya Ferguson, Orange County Senior Care Clinic, Tustin; Joytika Fernandes, Medical University of South Carolina, Charleston; Kristin Ferree, Diabetes & Endocrinology Consultants, Morehead; Beth Ferrington, Arthritis & Diabetes Clinic, Monroe; Stacey Fitzgibbons, Crouse Medical Practice, Syracuse; Margeret Fitzhugh, Natchitoches Medical Specialists, Natchitoches; Rosaliee Fitzsimmons, Suncoast Medical Center, St. Petersburg; Donna Flanders, North Texas Endocrine Center, Dallas; Maryalice Flores, Northeast Clinical Research Center, Bethlehem; Edith Flores, Facey Medical Group, Mission Hills; John Flores, Facey Medical Group, Mission Hills; Maryalice Flores, Northeast OB/GYN Associates Schertz; Christine Florida, Anaheim Clinical Trials, Anaheim; Jacob Flynn, Professional Clinical Research, Interlochen; Pink Folmar, Radiant Research Inc, Birmingham; Ray Forbes, Crouse Medical Practice, Syracuse; Wanissa Ford, Rush University Medical Center, Chicago; Michael Fowler, Vanderbilt University Medical Center, Nashville; Ann Fraker, Greater Baltimore Medical Center, Baltimore; Spencer Francis, Physicians Group, Little Rock; Edgardo Franco-Cotto, Eastern Consulting Group Inc, Humacao; Corina Fratila, Greater Baltimore Medical Center, Baltimore; Martiza Fuentes, Suncoast Medical Center, St. Petersburg; Robert Galagan, Tulane University School of Medicine, New Orleans; Allison Galloway, OUHSC: Diabetes and Endocrinology, Oklahoma City; Michelle Garcia, American Institute of Research, Los Angeles; Ronald Garcia, Covenant Clinical Research, San Antonio; Martha Garriott, University of Tennessee Health Science Center, Memphis; Joseph Garza, Northeast Clinical Research Center, Bethlehem; Nicole Gass, Apex Medical Research Inc, Chicago; Sabrena Gates, Emory Clinic at Emory Saint Joseph's, Atlanta; Sarah Gates, Louis Stokes Cleveland VA Medical Center, Cleveland; Mary Geary, Innovative Research of West Florida, Clearwater; Katharine Geiger, Blair Medical Associates Inc, Altoona; Jennifer Geishauser, Blair Medical Associates Inc, Altoona; Anthony Giglio, Mercy Medical Research Institute, Springfield; Matthew Gilbert, University of Vermont Medical Center, Burlington; Sarah Godwin, Physicians East Endocrinology, Greenville; Bebe Goetter, Eastern Shore Medical Specialists, Fairhope; April Goley, UNC Diabetes Care Center, Chapel Hill; Laura Golici, UT Southwestern Medical Center, Dallas; Elisabeth Gomori, Medex Healthcare Research, New York; Jody Gonzales, Benefis Med Spa, Great Falls; Ashwini Gore, Medical University of South Carolina, Charleston; Timothy Gorman, Great Lakes Medical Research, Westfield; Albina Gosmanova, University of Oklahoma College of Medicine, Oklahoma City; Ketan Goswami, Physicians Research Associates LLC, Lawrenceville; Ann Gotham, University of Vermont Medical Center, Burlington; James Govoni, Panacea Clinical Research, San Antonio; Steven Graddick, Internal Medicine Associates of Greenville, Ann Arbor; Tiffany Grant, Radiant Research Inc, Chicago; Amanda Greca, OUHSC: Diabetes and Endocrinology, Oklahoma City; Carrie Green, DCOL Center for Clinical Research, Longview; Kathleen Greenbaum, Christiana Medical Aid Unit, Newark; James Greenwald, Medex Healthcare Research, New York; Daniel Grover, Internal Medicine Associates of Greenville, Ann Arbor; George Grunberger, Grunberger Diabetes Institute, Bloomfield Hills; Michael Guice, American Institute of Research, Los Angeles; David Guirao, Internal Medicine Associates of Greenville, Ann Arbor; Vijayasudha Gunna, Southeastern Endocrine & Diabetes, Roswell; Nina Guseva, Southern New Hampshire Diabetes and Endocrinology, Nashua; Thu Ha, Linda Vista Health Care Center, San Diego; Anjani Hagan, Louis Stokes Cleveland VA Medical Center, Cleveland; Shelton Hager, Holston Medical Group, Kingsport; Amina Haggag, Anaheim Clinical Trials, Anaheim; Michelle Haggar, Tulane University School of Medicine, New Orleans; Maxine Hamilton, Maxine Hamilton PA, Fort Lauderdale; Melinda Hamilton, Medex HealthCare Research, St. Louis; Pearlena Hamlet, St Johns Health System Inc, Springfield; Judy Hammond, Carolina Health Specialists, Myrtle Beach; Ashley Hansen, Optimum Clinical Research, Salt Lake City; Wendy Harrell, Mountain View Clinical Research, Greer; Elizabeth Harris, UNC Diabetes Care Center, Chapel Hill; Kathi Harris, OhioHealth Marion Area Physicians, Marion; Mary Harris, Naidu Clinic, Odessa; Lindsay Harrison, University of Texas Southwestern Medical Center, Dallas; Israel Hartman, Dr. Israel A. Hartman MD Clinical Practice, Dallas; Adrienne Hatch, Meridien Research, Brooksville; Daniel Hayes, University of Michigan Comprehensive Cancer Center, Ann Arbor; Michael Hayes, Awasty Research Network, Marion; Judy Heath, Internal Medicine Associates of Greenville, Ann Arbor; Rob Heineman, University of Nebraska Medical Center, Omaha, NE; April Heinzman, Facey Medical Group, Mission Hills; Mary Hendrick, Meridien Research, St. Petersburg; Roberta Herbst, Professional Clinical Research, Interlochen; Kathie Hermayer, Medical University of South Carolina, Charleston; Janet Hibbard, Lexington VA Medical Center, Lexington; WD Hill, Northeast Clinical Research Center, Bethlehem; Belinda Hilliard, AM Diabetes & Endocrinology Center, Bartlett; Matthew Hix, University Specialty Clinics, Columbia; Brian Hoch, Medex Healthcare Research, New York; Priscilla Hollander, Baylor Endocrine Center, Dallas; Zella Holmes, Mercy Medical Research Institute, Springfield; Catherine Horobetz, University of Tennessee Health Science Center, Memphis; Rivkah Horowitz, Greater Baltimore Medical Center, Baltimore; Paul Hsieh, Orange County Senior Care Clinic, Tustin; Sue Hsieh, Dignity Health - Chandler Regional Medical Center, Chandler; Wynn Htun, Tulane University School of Medicine, New Orleans; Jimmy Huang, American Institute of Research, Los Angeles; Christine Huber, Christ Hospital Lindner Research Center, Cincinnati; Tina Hudson, DCOL Center for Clinical Research, Longview; Sulmarur Huizar, Facey Medical Group, Mission Hills; Beatrice Hull, Medical University of South Carolina, Charleston; Jenny Hull, Preferred Primary Care Physicians, Pittsburgh; Kimberly Hummer, OUHSC: Diabetes and Endocrinology, Oklahoma City; Ripudaman Hundal, Christiana Medical Aid Unit, Newark; Gloria Hunt, Awasty Research Network, Marion; Vickie Hunt, Medical University of South Carolina, Charleston; Phillip Hutchinson, University Specialty Clinics, Columbia; Jai Hwang, Internal Medicine Associates of Greenville, Ann Arbor; Anthony Iannamorelli, Preferred Primary Care Physicians, Uniontown; Lisa Iannuzzi, Endocrine Associates of Long Island, Smithtown; Michelle Ingram, Veterans Affairs Medical Center, Omaha; Nazia Iram, Northwest Houston Cardiology, Houston; Faramarz Ismail-Beigi, University Hospitals Case Medical Center, Cleveland; Faramarz Ismail-Beigi, CWRU School of Medicine, Cleveland; Serge Jabbour, Thomas Jefferson University Hospitals, Philadelphia; Timothy Jackson, Heritage Valley Medical Group, Beaver; Luzmaria Jaen, Paramount Medical Research & Consulting, Cleveland; Vandana Jain, Radiant Research Inc, Chicago; Roya Jannesari, AMCR Institute Inc, Escondido; Victoria Januski, Physicians East Endocrinology, Greenville; Usha Japa, Tulane University School of Medicine, New Orleans; Kelly Jarvis, Louis Stokes Cleveland VA Medical Center, Cleveland; Lindsay Jayson, Research Institute of the Carolinas, Mooresville; Richard Jensen, Benefis Medical Group, Great Falls; Donni Jester, Southeastern Endocrine & Diabetes, Roswell; Christine Jocko, Crouse Medical Practice, Syracuse; Carol Johnson, Carol M Johnson MD LLC, Alabaster; Mandi Johnson, AM Diabetes & Endocrinology Center, Bartlett; Megan Johnson, Washington State University, Spokane; Kelly Johnston, 400 North Medical Center, Michigan City; Dan Jones, Harrison Community Hospital, Cadiz; Jocelyn Jones, Rush University Medical Center, Chicago; Terry Jordan, Blair Medical Associates Inc, Altoona; Mario Juarez, Panacea Clinical Research, San Antonio; Abhishake Kaapuraala, Iowa Diabetes & Endocrinology Center, Des Moines; Angela Kain, Robley Rex VAMC, Louisville; Valerie Kaiser, Awasty Research Network, Marion; Kent Kamradt, Radiant Research Inc, Chicago; Peggy Karatoprakli, Veterans Affairs Medical Center, Omaha; Marjan Karegar, Robley Rex VAMC, Louisville; Chrisi Karounos, Lexington VA Medical Center, Lexington; Dennis Karounos, Lexington VA Medical Center, Lexington; Harischandra Karunaratne, Florida Heart Group, Orlando; Bonnie Katalenich, Tulane University School of Medicine, New Orleans; Kristen Katic, Preferred Primary Care Physicians, Uniontown; Michelle Katz, North Texas Endocrine Center, Dallas; Gulsharn Kaur, Bala and Khaira Medical Center, Fresno; Ashley Kawa, Louis Stokes Cleveland VA Medical Center, Cleveland; Caroline Keib, Crouse Medical Practice, Syracuse; Gayle Keider, Oakland Medical Research Center, Troy; David Kem, University of Oklahoma College of Medicine, Oklahoma City; Ryan Kennedy, UK HealthCare Kentucky Clinic, Lexington; Barbara Kenney, Apex Medical Research Inc, Chicago; Dean Kereiakes, Christ Hospital Lindner Research Center, Cincinnati; Mohamed Ketana, American Institute of Research, Los Angeles; Lindsey Kettinger, Medical University of South Carolina, Charleston; Ajit Khaira, Bala and Khaira Medical Center, Fresno; Amna Khan, Tulane University School of Medicine, New Orleans; Khaleda Khan, American Institute of Research, Los Angeles; Meena Khan, Greater Baltimore Medical Center, Baltimore; Muneer Khan, OUHSC: Diabetes and Endocrinology, Oklahoma City; Teck Khoo, Mercy Medical Center, Des Moines; Narine Khrlobyan, Facey Medical Group, Mission Hills; James Kilgore, Clinical Research Consultants Inc, Hoover; Grace Kim, Facey Medical Group, Mission Hills; Sarah Kimble, Medical University of South Carolina, Charleston; Maureen Kinsley, Jersey Shore University Medical Center, Neptune; Timothy Kitchen, Great Lakes Medical Research, Westfield; Michelle Klick, Crouse Medical Practice, Syracuse; Wendy Kniffen, Dallas Diabetes & Endocrine Center, Dallas; Rebecca Knight, Pioneer Medical Group, Cerritos; Dorothy Kodzwa, Medical University of South Carolina, Charleston; Troy Koenig, FPA Clinical Research, Kissimmee; Kateryna Komarovskiy, Robley Rex VAMC, Louisville; Yuthana Kong, Anaheim Clinical Trials, Anaheim; David Koontz, Internal Medicine Associates of Greenville, Ann Arbor; Sathya Krishnasamy, Robley Rex VAMC, Louisville; Sathya Krishnasamy, Louisville VA Medical Center, Louisville; Elizabeth Krueger, Radiant Research Inc, Chicago; Lisa Kuechenmeister, Veterans Affairs Medical Center, Omaha; Ann Kuehl, Apex Medical Research Inc, Chicago; Kevin Kuettel, Anaheim Clinical Trials, Anaheim; David Kugler, Endocrine Associates of Long Island, Smithtown; Tanya Kulow, University Hospitals Case Medical Center, Cleveland; Tanya Kulow, Louis Stokes Cleveland VA Medical Center, Cleveland; Igor Kupriyanchik, Grunberger Diabetes Institute, Rochester, MI; Tulsidas Kuruvanka, Northwest Houston Cardiology, Houston; Donald Kushner, Preferred Primary Care Physicians, Pittsburgh; Elise Kwon, Facey Medical Group, Mission Hills; Sooho Kwon, Medical University of South Carolina, Charleston; Michael Kyle, Radiant Research Inc, Chicago; Lauren LaBryer, OUHSC: Diabetes and Endocrinology, Oklahoma City; Joseph Labuda, Preferred Primary Care Physicians, Uniontown; Julie Lafave, Oakland Medical Research Center, Troy; Jacques Laguerre, Novant Health Southern Piedmont, Monroe; Alison Laliberte, Southern New Hampshire Diabetes and Endocrinology, Nashua; James Lane, OUHSC: Diabetes and Endocrinology, Oklahoma City; Christine Langel, Mercy Medical Center, Des Moines; Danielle Lann, Jersey Shore University Medical Center, Neptune; Joseph Largay, UNC Diabetes Care Center, Chapel Hill; Kashif Latif, AM Diabetes & Endocrinology Center, Bartlett; Tammi Latus, DCOL Center for Clinical Research, Longview; Jereta Lawrence, Arthritis & Diabetes Clinic, Monroe; Gregory Ledger, Mercy Medical Research Institute, Springfield; Francis Gil Lee, Greater Baltimore Medical Center, Baltimore; Elizabeth Lee, Anaheim Clinical Trials, Anaheim; Jonathan Leffert, North Texas Endocrine Center, Dallas; Matthew Leinung, Albany Medical Center, Albany; M. James Lenhard, Christiana Medical Aid Unit, Newark; Joseph Lentino, Radiant Research Inc, Chicago; Julissa Leon, Baylor Endocrine Center, Dallas; Molly Leonard, University of Colorado School of Medicine, Denver; Nancy Letassy, OUHSC: Diabetes and Endocrinology, Oklahoma City; Kathryn Leuck, Research Institute of Dallas, Dallas; Philip Levin, Greater Baltimore Medical Center, Baltimore; Dennis Levinson, Apex Medical Research Inc, Chicago; Melissa Lewis, Physicians East Endocrinology, Greenville; Timothy Light, Innovative Research of West Florida, Clearwater; Jonea Lim, OUHSC: Diabetes and Endocrinology, Oklahoma City; Ronald Lindamood, Internal Medicine Associates of Greenville, Ann Arbor; Ildiko Lingvay, UT Southwestern Medical Center, Dallas; Janie Lipps, Vanderbilt University Medical Center, Nashville; Anna Lisa, Chavana Northeast Clinical Research Center, Bethlehem; Yolanda Livingston, Mountain View Clinical Research, Greer; Lee Llamas, Anaheim Clinical Trials, Anaheim; Ryan Loesch, University of Colorado School of Medicine, Denver; Tanya Long, Alzohaili Medical Consultants, Dearborn; Robert Looby, Harrison Community Hospital, Cadiz; Carlos Lopez, New YorkPresbyterian University Hospital of Columbia, New York; Timothy Lorenz, Oakland Medical Research Center, Troy; Dragana Lovre, Tulane University School of Medicine, New Orleans; Peter Lu, Physicians Research Associates LLC, Lawrenceville; Kathryn Lucas, Diabetes & Endocrinology Consultants, Morehead; Gabriela Luevano, Narbonne Medical, Lomita; Mary Luidens, Albany Medical Endocrinology Albany; Blanca Luna, Speedway Family Practice Stanley F Stockhammer Jr, Deland; Louis Luttrell, Medical University of South Carolina, Charleston; Timothy Lyons, OUHSC: Diabetes and Endocrinology, Oklahoma City; Maria MacAdams, Covenant Medical Center, Lubbock; Michael MacAdams, Covenant Medical Center, Lubbock; David Mack, Medex Healthcare Research, New York; Mellie Mack, Awasty Research Network, Marion; Marcia Madden, International Diabetes Center, Minneapolis; Robert Madder, Heritage Valley Medical Group, Beaver; Shiyanka Madireddy, Dynamed Clinical Research, Houston; Laura Mae, Pearlman Radiant Research Inc, Chicago; Aparna Mahakala, Physicians Research Associates LLC, Lawrenceville; Hiralal Maheshwari, Midwest Endocrinology, Crystal Lake; Hussain Malbari, Martin Diagnostic Clinic, Tomball; Norman Maldonado, American Institute of Research, Los Angeles; Michelle Mallitz, Meridien Research, St. Petersburg; Mustafa Mandviwala, Northwest Heart Center, Tomball; Kara Mann, Dallas Diabetes & Endocrine Center, Dallas; Milena Mardahay, Medex Healthcare Research, New York; Jaime Marino, Apex Medical Research Inc, Chicago; Annis Marney, University of Vermont Medical Center, Burlington; Lisa Marshall, Southern New Hampshire Diabetes and Endocrinology, Nashua; Adriana Martin, Medex HealthCare Research, St. Louis; Earl Martin, Martin Diagnostic Clinic, Tomball; Geraldine Martinez, Catalina Research Institute, Chino; Gilbert Martinez, Catalina Research Institute, Chino; Salomon Martinez-Miss, Catalina Research Institute, Chino; Phyllis Marx, Radiant Research Inc, Chicago; Leslie Massara, Thomas Jefferson University Hospitals, Philadelphia; Momina Mastoor, Union Memorial Hospital, Baltimore; Glenn Matfin, International Diabetes Center, Minneapolis; Amita Maturu, University of Colorado School of Medicine, Denver; Peter Maurides, Internal Medicine Associates of Greenville, Ann Arbor; Michael May, Vanderbilt University Medical Center, Nashville; Ronald Mayfield, Mountain View Clinical Research, Greer; Bobby Maynard, Great Falls Clinic, Great Falls; Angela Mazza, Florida Diabetes/Endocrine Center, Orlando; Kathy McCann, International Diabetes Center, Minneapolis; James McCoy, University Specialty Clinics, Columbia; Todd McCoy, FPA Clinical Research, Kissimmee; Mary Kate McCullen, Thomas Jefferson University Hospitals, Philadelphia; Clayton McDaniel, Monterey Bay Family Physicians, Watsonville; Anne-Marie McDaniel, Monterey Bay Family Physicians, Watsonville; Michael McDermott, University of Colorado Hospital - Anschutz Inpatient Pavilion, Aurora; Andrew McDonald, Internal Medicine Associates of Greenville, Ann Arbor; Camille McDonald, Novant Health Southern Piedmont, Monroe; Roberta McDuffie, Tulane University School of Medicine, New Orleans; Brandi McMasters, Naidu Clinic, Odessa; Corey McMurray, Awasty Research Network, Marion; Terri Medlin, Diabetes & Endocrinology Consultants, Morehead; Monya Meinel, Radiant Research Inc, Chicago; Iris Mendez, Covenant Medical Center, Lubbock; Judson Menefee, Eastern Shore Medical Specialists, Fairhope; Melissa Meredith, University of Wisconsin School of Medicine and Public Health, Madison; Marcus Merriweather, FPA Clinical Research, Kissimmee; James Mersey, Greater Baltimore Medical Center, Baltimore; Christine Messino, Clinical Study Center of Asheville, Asheville; Stephen Meyer, Tampa Clinical Research, Tampa; Linda Meyers, Medical University of South Carolina, Charleston; Donna Michael, Heritage Valley Medical Group, Beaver; Catherine Midyett, Arthritis & Diabetes Clinic, Monroe; Audrey Miklius, Research Institute of Dallas, Dallas; Emily Milford, Radiant Research Inc, Chicago; Bonnie Miller, Internal Medicine Associates of Greenville, Ann Arbor; Harold Miller, Crescent City Clinical Research, Metairie; Melissa Milligan, Awasty Research Network, Marion; Anita Minor, Medex HealthCare Research, St. Louis; Bresta Miranda-Palma, University of Miami Diabetes Treatment Center, Miami; Nicole Mirarchi, Thomas Jefferson University Hospitals, Philadelphia; Saritha Mittadodla, OUHSC: Diabetes and Endocrinology, Oklahoma City; Janette Mittle, Tampa Clinical Research, Tampa; Ann Moffat, Monterey Bay Family Physicians, Watsonville; Stephen Mohaupt, Catalina Research Institute, Chino; Kamran Mohiuddin, Northwest Heart Center, Tomball; Sri Mokshagundam, Robley Rex VAMC, Louisville; Susan Monaco, Anaheim Clinical Trials, Anaheim; Ronald Monsaert, Christiana Medical Aid Unit, Newark; Cynthia Montano-Pereira, Catalina Research Institute, Chino; Austin Montgomery, Medex HealthCare Research, St. Louis; Kelly Moody, Clinical Study Center of Asheville, Asheville; Mia Moon, Catalina Research Institute, Chino; Deborah Moore, Christiana Medical Aid Unit, Newark; Laura Moore, University Hospitals Case Medical Center, Cleveland; Laura Moore, Louis Stokes Cleveland VA Medical Center, Cleveland; Emily Morawski, Holston Medical Group, Kingsport; Cynthia Moreau, Tulane University School of Medicine, New Orleans; David Morin, Holston Medical Group, Kingsport; Carmen Moscoa, AMCR Institute Inc, Escondido; Chelsey Motzkin, Medex Healthcare Research, New York; Richard Mueller, Medex Healthcare Research, New York; Christina Munoz, Rush University Medical Center, Chicago; Miguel Munoz, Southeastern Endocrine & Diabetes, Roswell; Anjana Myneni, Grunberger Diabetes Institute, Bloomfield Hills; Bahar Naderi, Facey Medical Group, Mission Hills; Prathima Nagireddy, Grunberger Diabetes Institute, Bloomfield Hills; Jayaram Naidu, Naidu Clinic, Odessa; Raja Naidu, Naidu Clinic, Odessa; Savita Naik, Medex Healthcare Research, New York; Roberta Naimark, Clinical Study Center of Asheville, Asheville; Maria Nardicchi, Grunberger Diabetes Institute, Bloomfield Hills; Ikeadi Ndukwu, 400 North Medical Center, Michigan City; Christian Neller, Tampa Clinical Research, Tampa; Lisa Netten-Foster, Iowa Diabetes & Endocrinology Center, Des Moines; Joshua Neumiller, Washington State University, Spokane; Tirado New, York-Presbyterian University Hospital of Columbia, New York; Susan Newman, Great Lakes Medical Research, Westfield; Tabitha Newton, Instituto De Endocrinologia Diabetes, Levittown; BaoAn Nguyen, Veterans Affairs Medical Center, Omaha; Brent Nicol, The Diabetes Center, Murrells Inlet; Philip Nicol, The Diabetes Center, Murrells Inlet; Loretta Ninivaggi, Jersey Shore University Medical Center, Neptune; Kevin Niswender, Vanderbilt University Medical Center, Nashville; Lana Norman, Diablo Clinical Research, Walnut Creek; Gary Noworatzky, Dr. Israel A. Hartman MD Clinical Practice Dallas; Ebenzer Nyenwe, University of Tennessee Health Science Center, Memphis; Heather O'Brien, Physicians East, Greenville, NC; Thomas O'Connell, UNC Diabetes Care Center, Chapel Hill; Wendy Oden, DCOL Center for Clinical Research Longview; Adeniyi Odugbesan, Physicians Research Associates LLC, Lawrenceville; Michael Oliver, Heritage Valley Medical Group, Beaver; Tonya Oliver, 400 North Medical Center, Michigan City; Carly Olmeda, Tulane University School of Medicine, New Orleans; Christine O'Neil, Southern New Hampshire Diabetes and Endocrinology, Nashua; Ruth Oremus, Lexington VA Medical Center, Lexington; Tania Ortega, American Institute of Research, Los Angeles; Sonia Ortiz-Santos, Instituto De Endocrinologia Diabetes, Levittown; Tracey Osborn, Innovative Research of West Florida, Clearwater; Sailatha Padmanabhan, University of Oklahoma College of Medicine, Oklahoma City; Olivia Papacostea, UT Southwestern Medical Center, Dallas; Inna Park, Medex HealthCare Research, St. Louis; Anna Parker, Anaheim Clinical Trials, Anaheim; Kristine Parker, Medical University of South Carolina, Charleston; R. Parker, University Specialty Clinics, Columbia; Christine Patel, University Hospitals Case Medical Center, Cleveland; Christine Patel, Louis Stokes Cleveland VA Medical Center, Cleveland; Minesh Patel, 400 North Medical Center, Michigan City; Rakesh Patel, Endocrine and Psychiatry Center, Houston; Roshni Patel, Novant Health Southern Piedmont, Monroe; Marisol Patino, Wilshire Oncology Medical Group, Corona; Sara Patterson, Benefis Medical Group, Great Falls; Katrina Paulson, Benefis Medical Group, Great Falls; Alejandro Paz, AMCR Institute Inc, Escondido; Riga Pemba, Facey Medical Group, Mission Hills; Constance Pepe, Thomas Jefferson University Hospitals, Philadelphia; Jose Perez, FPA Clinical Research, Kissimmee; Tamra Perez, Robley Rex VAMC, Louisville; Debbie Perry, KD Medical Group Inc, Columbia; Bunny Phillips, Mountain View Clinical Research, Greer; Julie Phillips, Medical Group, Kingsport; Alicia Pickett, University Hospitals Case Medical Center, Cleveland; Alicia Pickett, Louis Stokes Cleveland VA Medical Center, Cleveland; Mark Pinson, Medex Healthcare Research, St. Louis; Robin Pitzer, Northeast Clinical Research Center, Bethlehem; Madhuri Poduri, UT Southwestern Medical Center, Dallas; Jennifer Poehls, University of Wisconsin School of Medicine and Public Health, Madison; Tony Poteat, Internal Medicine Associates of Greenville, Ann Arbor; Lisa Powell, Alzohaili Medical Consultants, Dearborn; Siripurapu Prasad, OhioHealth Marion Area Physicians, Marion; Richard Pratley, University of Vermont Medical Center, South Burlington; Richard Pratley, Florida Diabetes/Endocrine Center, Orlando; Jonathan Prevost, Medical Associates of New York, New York; Evelyn Price, Panacea Clinical Research, San Antonio; Diane Priest, OUHSC: Diabetes and Endocrinology, Oklahoma City; Luz Prieto, University of Miami, Miami; Tarlock Purewal, Awasty Research Network, Marion; Raman Purighalla, Preferred Primary Care Physicians, Pittsburgh; Uma Purighalla, Preferred Primary Care Physicians, Pittsburgh; Mark Quadrel, Internal Medicine of Morris County, Dover; Ambreen Qureshi, UK HealthCare Kentucky Clinic, Lexington; Rani Radhamma, Mercy Medical Research Institute, Springfield; Eman Rafla, Internal Medicine of Morris County, Dover; Hussein Rajab, Medical University of South Carolina Charleston; Ramesh Ramalingam, University of Nebraska Medical Center, Omaha, NE; Alexandra Ramirez, North Texas Endocrine Center, Dallas; Julie Ramirez, American Institute of Research, Los Angeles; Karina Ramirez, Anaheim Clinical Trials, Anaheim; Maria Ramirez, Medical University of South Carolina, Charleston; Martin Randall, Grunberger Diabetes Institute, Rochester, MI; Uma Rangaraj, Arthritis & Diabetes Clinic, Monroe; Veitla Rao, OUHSC: Diabetes and Endocrinology, Oklahoma City; Pat Rasmussen, Midwest Endocrinology, Crystal Lake; Neda Rasouli, University of Colorado Denver – Veterans Hospital, Aurora; Neda Rasouli, Denver VA Medical Center, Denver; Anita Ray, North Texas Endocrine Center, Dallas; Shannon Ray, Whiteville Medical Associates, Whiteville; John Reed, Southeastern Endocrine & Diabetes, Roswell; Lucy Rems, Anaheim Clinical Trials, Anaheim; Karen Renaud, Tampa Clinical Research, Tampa; Marie Reno, Medex HealthCare Research, St. Louis; Maria Resnick, Great Lakes Medical Research, Westfield; Jane Reusch, Denver VA Medical Center, Denver; L. Reynolds, University of Kentucky Medical Center, Lexington; Kimberly Rhoton, Medical University of South Carolina, Charleston; Jackson Rhudy, Optimum Clinical Research, Salt Lake City; Cassie Ricci, OUHSC: Diabetes and Endocrinology, Oklahoma City; Lucian Rice, Clinical Study Center of Asheville, Asheville; Antoinette Richardson, Vanderbilt University Medical Center, Nashville; Lynn Richardson, Louis Stokes Cleveland VA Medical Center, Cleveland; Lynn Richardson, Louis Stokes Cleveland VA Medical Center, Cleveland; Heather Rickard, Mountain View Clinical Research, Greer; Michael Rickels, Diabetes Endocrine, Spruce; Dennis Riff, Advanced Clinical Research Institute, Anaheim; Nancy Rightenour, Blair Medical Associates Inc, Altoona; Joseph Risser, Linda Vista Health Care Center, San Diego; Abid Rizvi, Mercury Pharma Services, Houston; Ali Rizvi, University Specialty Clinics, Columbia; Jennifer Robertson, Mercy Medical Research Institute, Springfield; Annette Robinson, University of Louisville Physicians, Louisville; Randall Robinson, Mercy Medical Research Institute, Springfield; Marion Rockwell, Blair Medical Associates Inc, Altoona; JuanPablo Rodriguez, The Diabetes Research Center, Fletcher Allen Health Care, South Burlington, VT; Mayra Rodriguez, FPA Clinical Research, Kissimmee; Martha Rojas, Anaheim Clinical Trials, Anaheim; Wendy Rojas, Pioneer Medical Group, Cerritos; Leslie Rooker-Morris, Dallas Diabetes & Endocrine Center, Dallas; Connie Root, Vanderbilt University Medical Center, Nashville; Muriel Rose, Monterey Bay Family Physicians, Watsonville; Richard Rosenberg, New York-Presbyterian University Hospital of Columbia, New York; Julio Rosenstock, Dallas Diabetes & Endocrine Center, Dallas; Marilynn Roth, University of Vermont Medical Center, South Burlington; Rachel Ruby, Monterey Bay Family Physicians, Watsonville; Richard Sachson, Endocrine Associates of Dallas, Dallas; Paul Sack, Union Memorial Hospital, Baltimore; R. Kent Sadler, Northeast Clinical Research Center, Bethlehem; Subhash Sahai, Iowa Diabetes & Endocrinology Center, Des Moines; Jennifer Salazar, OUHSC: Diabetes and Endocrinology, Oklahoma City; Manjula Salgam, Albany Medical Center, Albany; Aditya Samal, Northwest Houston Cardiology, Houston; Anil Samson, Apex Medical Research Inc, Chicago; Rebecca Sanagorski, Denver VA Medical Center, Denver; Angela Sanchez, Dr. Israel A. Hartman MD Clinical Practice, Dallas; Jay Sandberg, Oakland Medical Research Center, Troy; Marvin Sanderson, Physicians Group, Little Rock; Jaime Sandoval, Corpus Christi Memorial Hospital, Corpus Christi; Esther Santiago, FPA Clinical Research, Kissimmee; Tabby Sapp, Southeastern Endocrine & Diabetes, Roswell; Jacqueline Saunders, Mountain View Clinical Research, Greer; Joseph Schill, Research Institute of Dallas, Dallas; Charles Schott, AMCR Institute Inc, Escondido; Robert Schreiman, Orange County Senior Care Clinic, Tustin; Deborah Schu, Crouse Medical Practice, Syracuse; Kristy Schuh, Baylor Endocrine Center, Dallas; Mark Schutta, Diabetes Endocrine, Spruce; Jane Schwartz, Christ Hospital Lindner Research Center, Cincinnati; Laurie Schweppe, Meridien Research, St. Petersburg; Hal Scofield, University of Oklahoma College of Medicine, Oklahoma City; Anita Scribner, DCOL Center for Clinical Research, Longview; Jennifer Seal, 400 North Medical Center, Michigan City; John Sealock, Medex Healthcare Research, New York; Bruce Seaton, Research Institute of the Carolinas, Mooresville; Theresa Sedlak-Hanslik, Paramount Medical Research & Consulting, Cleveland; Kathleen Seekins, Panacea Clinical Research, San Antonio; Marianne Segal, Innovative Research of West Florida, Clearwater; Stacey Seggelke, University of Colorado Hospital - Anschutz Inpatient Pavilion, Aurora; Stephanie Semenza, Great Falls Clinic, Great Falls; Patricia Sentman, Meridien Research, Tampa; Marian Serra, Optimum Clinical Research, Salt Lake City; Prakash Seshadri, Christiana Medical Aid Unit, Newark; Eduardo Sevilla, Diablo Clinical Research, Walnut Creek; Shamik Shah, Grunberger Diabetes Institute, Bloomfield Hills; Kristen Shaheen, Physicians East Endocrinology, Greenville; Michael Shanik, Endocrine Associates of Long Island, Smithtown; Jessica Shaw, COR Clinical Research, Oklahoma City; Michelle Sheets, 400 North Medical Center, Michigan City; Carol Shellabarger, Southeastern Endocrine & Diabetes, Roswell; Jay Sher, Jersey Shore University Medical Center, Neptune; Jeanette Shippey, Southern New Hampshire Diabetes and Endocrinology, Nashua; Vijay Shivaswamy, Veterans Affairs Medical Center, Omaha; Mansur Shomali, Union Memorial Hospital, Baltimore; David Shore, Physicians Research Associates LLC, Lawrenceville; Pranavkumar Shroff, Apex Medical Research Inc, Chicago; Taha Siddiqui, Apex Medical Research Inc, Chicago; Angela Siegwald, University of Louisville Physicians, Louisville; Robert Silver, Southern New Hampshire Diabetes and Endocrinology, Nashua; Debra Simmons, Utah Diabetes Endocrinology Center, Salt Lake City; Robyn Simons, Internal Medicine Center, Mobile; Abdulhadi Sinan, Alzohaili Medical Consultants, Dearborn; Manmeet Singh, Tulane University School of Medicine, New Orleans; Sirinart Sirinvaravong, University Specialty Clinics, Columbia; Jennifer Skero, Covenant Medical Center, Lubbock; Judith Slover-Zipf, Jersey Shore University Medical Center, Neptune; Sarah Small, Novant Health Southern Piedmont, Monroe; Bridgette Smith, Kernodle Clinic Inc, Burlington; Kristy Smith, Mountain View Clinical Research, Greer; Megan Smith, Novant Health Southern Piedmont, Monroe; Jennifer Sohl, Crouse Medical Practice, Syracuse; Sarah-Helen Solarz, Louis Stokes Cleveland VA Medical Center, Cleveland; Sarah-Helen Solarz, University Hospitals Case Medical Center, Cleveland; Daniel Soler, Catalina Research Institute Chino; Ajay Sood, University Hospitals Case Medical Center, Cleveland; Nicoletta Sora, Medical University of South Carolina, Charleston; Annie Souchet, Apex Medical Research Inc, Chicago; Jeremy Soule, Medical University of South Carolina, Charleston; Jeffrey Sparks, Kernodle Clinic Inc, Burlington; Linda Spector, Southern New Hampshire Diabetes and Endocrinology, Nashua; Richard Speicher, Central Florida Medical Associates, Deland; Lori Spillers, Medical University of South Carolina, Charleston; Traci Spivey, Northeast Clinical Research Center, Bethlehem; Nina Springer, Preferred Primary Care Physicians, Uniontown; Heidi Sprouse, Blair Medical Associates Inc, Altoona; Jennifer St. John, OUHSC: Diabetes and Endocrinology, Oklahoma City; Amy Stacey, DCOL Center for Clinical Research, Longview; Helen Stacey, Diablo Clinical Research, Walnut Creek; Mollie Stafford, Clinical Study Center of Asheville, Asheville; Eva Stagner, DCOL Center for Clinical Research, Longview; Karen Staples, Carolina Health Specialists, Myrtle Beach; Emily Steadman, Radiant Research Inc, Chicago; Robert Steed, Southeastern Endocrine & Diabetes, Roswell; Gerald Steeves, Blair Medical Associates Inc, Altoona; Helmut Steinberg, University of Tennessee Health Science Center, Memphis; Carol Stell, Tulane University School of Medicine, New Orleans; Edward Stirman, Holston Medical Group, Kingsport; Karl Straub, John L. McClellan Memorial Veterans Hospital, Little Rock; Elinor Strock, International Diabetes Center, Minneapolis; Marian Sue, Kirkman UNC Diabetes Care Center, Chapel Hill; Orlando Suris, Northeast Clinical Research Center, Bethlehem; Terri Sutton, Diabetes & Endocrinology Consultants, Morehead; Isam Tabbah, OhioHealth Marion Area Physicians, Marion; Mitali Talsania, OUHSC: Diabetes and Endocrinology, Oklahoma City; Rocky Tang, New YorkPresbyterian University Hospital of Columbia, New York; Jessica Tapia, Southeastern Endocrine & Diabetes, Roswell; Kelly Taylor, Medical University of South Carolina, Charleston; Rebecca Taylor-Hancher, Preferred Primary Care Physicians, Uniontown; Rachel Teator, Baylor Endocrine Center, Dallas; Memello Tekateka, Radiant Research Inc, Chicago; Brian Temple, Medex Healthcare Research, New York; Karen Temple, Kernodle Clinic Inc, Burlington; Marsha Teodori, Rush University Medical Center, Chicago; Patricia Tharp, Tampa Clinical Research, Tampa; Tina Thethi, Tulane University School of Medicine, New Orleans; Pierre Theuma, Mercy Medical Center, Des Moines; Sarah Thomas, Radiant Research Inc, Chicago; Anna Thottan, University of Vermont Medical Center, South Burlington; James Thrasher, Physicians Group, Little Rock; Lesa Thrasher, Physicians Group, Little Rock; Monika Tiemeyer, Jersey Shore University Medical Center, Neptune; Margaret Tiktin, Louis Stokes Cleveland VA Medical Center, Cleveland; Margaret Tiktin, University Hospitals Case Medical Center, Cleveland; Irene Tinney, Naidu Clinic, Odessa; Timothy Tobin, Diagnostic Clinic of Longview, Longview; Shivani Toma, North Texas Endocrine Center, Dallas; Maritza Tovar, Suncoast Medical Center, St. Petersburg; Judith Townsend, Comprehensive Weight Control Center, New York; Constance Trantow, University of Wisconsin School of Medicine and Public Health, Madison; Henry Traylor, Whiteville Medical Associates, Whiteville; Miguel Trevino, Innovative Research of West Florida, Clearwater; Michael Troy, Northeast Clinical Research Center, Bethlehem; Darrell Trumper, Accurate Clinical Research, Houston; Jennifer Tryggestad, University of Colorado Hospital - Anschutz Inpatient Pavilion, Aurora; Carol Tucker, Grunberger Diabetes Institute, Bloomfield Hills; Juliana Turner, Clinical Study Center of Asheville, Asheville; Robert Turney, Kernodle Clinic Inc, Burlington; Cindy Tuten, Clinical Study Center of Asheville, Asheville; Joanna Tyzack, Greater Baltimore Medical Center, Baltimore; Lauren Ullo, Suncoast Medical Center, St. Petersburg; Chantal Underkofler, Denver VA Medical Center, Denver; Jeffrey Unger, Catalina Research Institute, Chino; Ramon Urdanetta, Florida Diabetes/Endocrine Center, Orlando; Vanessa Valdivia, Anaheim Clinical Trials, Anaheim; Sharon Valenti, Crouse Medical Practice, Syracuse; Anna Vanderheiden, UT Southwestern Medical Center, Dallas; Megan Vanderlinde-Wood, OUHSC: Diabetes and Endocrinology, Oklahoma City; Chandrasekhar Varma, AMCR Institute Inc, Escondido; Eloisa Vasquez, Anaheim Clinical Trials, Anaheim; Maripaz Vazquez, Rush University Medical Center, Chicago; David Vickery, Clinical Study Center of Asheville, Asheville; Betty Villafuerte, University of Louisville Physicians, Louisville; Claudia Villegas, Catalina Research Institute, Moreno; Jessica Vivar, Orange County Senior Care Clinic, Tustin; Krishnamoorthy Vivekananthan, Northwest Houston Cardiology, Houston; Glen Vo, Maxine Hamilton PA, Fort Lauderdale; Katarina Vukojicic, UNC Diabetes Care Center, Chapel Hill; Amy Wachter, Christiana Medical Aid Unit, Newark; Dain Wahl, Christ Hospital Lindner Research Center, Cincinnati; Jonathan Waitmann, Comprehensive Weight Control Center, New York; Debra Walker, Robley Rex VAMC, Louisville; John Walsh, AMCR Institute Inc, Escondido; Kimberly Walsh, Dartmouth-Hitchcock Medical Center, Lebanon; Anita Walton, Linda Vista Health Care Center, San Diego; Aileen Wang, Tulane University School of Medicine, New Orleans; Karla Wardell, Physicians Research Associates LLC, Lawrenceville; Mark Warren, Physicians East Endocrinology, Greenville; Michael Warren, Tampa Clinical Research, Tampa; Susan Watkins, North Texas Endocrine Center, Dallas; Jean Watkinson, Preferred Primary Care Physicians, Pittsburgh; Myra Watts, Medical Group, Kingsport; Veena Watwe, Endocrine and Psychiatry Center, Houston; Nancy Weaver, Blair Medical Associates Inc, Altoona; Robert Weber, Monterey Bay Family Physicians, Watsonville; Catherine Wedick, Comprehensive Weight Control Center, New York; Debra Weeks, Washington State University, Spokane; Larissa Weeks, Washington State University, Spokane; Kathleen Weindorff, DCOL Center for Clinical Research, Longview; Richard Weinstein, Diablo Clinical Research, Walnut Creek; Sarah Weiss, Meridien Research, Sarasota; Kelly Wenger, Naidu Clinic, Odessa; Marlene Wentworth, Radiant Research Inc, Chicago; Amanda Werner, Louis Stokes Cleveland VA Medical Center, Cleveland; Mary West, Naidu Clinic, Odessa; Sheila Whelan, Alzohaili Medical Consultants, Dearborn; Bee White, Catalina Research Institute, Chino; Judith White, Holston Medical Group, Kingsport; Melanie Whitmire, University Specialty Clinics, Columbia; Rochelle Whittington, Atlanta Diabetes Associates, Atlanta; Jessica Wical, Suncoast Medical Center, St. Petersburg; Christine Wigley, University of Tennessee Health Science Center, Memphis; Francesca Wilkins, Tulane University School of Medicine, New Orleans; Katharine Will, Blair Medical Associates Inc, Altoona; Aimee Williams, Diabetes & Endocrinology Consultants, Morehead; Lou Ellen Wilson, Facey Medical Group, Mission Hills; Meredith Wince, Medical University of South Carolina, Charleston; Sara Wine, Professional Clinical Research, Interlochen; Peter Winkle, Anaheim Clinical Trials, Anaheim; Connie Winner, Benefis Medical Group, Great Falls; Jonathan Wise, Crescent City Clinical Research, Metairie; Melanie Witte, University of Wisconsin School of Medicine and Public Health, Madison; Jackie Wittenmyer, Paramount Medical Research & Consulting, Cleveland; Cynthia Wood, Christ Hospital Lindner Research Center, Cincinnati; Ruth Wood, Mountain View Clinical Research, Greer; Chivers Woodruff, Radiant Research Inc, Birmingham; Bryan Worthington, Internal Medicine Associates of Greenville, Ann Arbor; Donny Wynn, OUHSC: Diabetes and Endocrinology, Oklahoma City; Carol Wysham, Washington State University, Spokane; Patricia Xavier, Martin Diagnostic Clinic, Tomball; Susana Yela, Catalina Research Institute, Chino; Lydia Yenoby, Tulane University School of Medicine, New Orleans; Laura Young, UNC Diabetes Care Center, Chapel Hill; Nadia Younus, Endocrine and Psychiatry Center, Houston; Veronica Yourell, Southern New Hampshire Diabetes and Endocrinology, Nashua; Musaab Zaid, Alzohaili Medical Consultants, Dearborn; Imran Zubair, Optimum Clinical Research, Salt Lake City.
